# Supplementary material for: Comprehensive molecular profiling of 718 Multiple Myelomas reveals significant differences in mutation frequencies between African and European descent cases
Source: PubMed Central journal article supplement (PMC5699827; doi:10.1371/journal.pgen.1007087), 2017-11-22
Supplement: pgen.1007087.s008.pdf [file pgen.1007087.s008.pdf]

**S3 Table.** Clinical Outline, Treatment summary, and karyotype summary

| Demographics                 | African-American | Caucasian       | p-value (Fisher's) |
|------------------------------|------------------|-----------------|--------------------|
| <b>GENDER</b>                |                  |                 |                    |
| Male                         | 59.8% (76/127)   | 62.4% (369/591) | 0.585              |
| Female                       | 40.1% (51/127)   | 37.5% (222/591) | 0.585              |
| <b>AGE(years)</b>            |                  |                 |                    |
| 25-39                        | 3.1% (4/127)     | 1.7% (10/591)   | 0.282              |
| 40-49                        | 11% (14/127)     | 4.6% (27/591)   | 0.004              |
| 50-59                        | 21.3% (27/127)   | 24.5% (145/591) | 0.433              |
| 60-69                        | 38.6% (49/127)   | 37.9% (224/591) | 0.886              |
| 70-79                        | 14.2% (118/127)  | 22.3% (132/591) | 0.040              |
| 80-89                        | 11% (14/127)     | 8.1% (48/591)   | 0.291              |
| 90-99                        | 0.8% (1/127)     | 0.8% (5/591)    | 0.948              |
| <b>Treatment</b>             |                  |                 |                    |
| IMiDs                        | 6.3% (8/127)     | 5.4% (32/591)   | 0.694              |
| Carfilzomib                  | 1.6% (2/127)     | 1.7% (10/591)   | 0.926              |
| Bortezomib                   | 25.2% (32/127)   | 28.4% (168/591) | 0.462              |
| Bortezomib/IMiDs             | 57.5% (73/127)   | 56.5% (334/591) | 0.842              |
| Carfilzomib/IMiDs            | 5.5% (7/127)     | 4.9% (29/591)   | 0.777              |
| Carfilzomib/Bortezomib       | 0.7% (1/127)     | 0.5% (3/591)    | 0.701              |
| Carfilzomib/IMiDs/Bortezomib | 3.1% (4/127)     | 2.5% (15/591)   | 0.697              |
| <b>Karyotype</b>             |                  |                 |                    |
| Hyperdiploid                 | 53.5% (68/127)   | 55.8% (303/591) | 0.642              |
| Nonhyperdiploid              | 46.4% (59/127)   | 48.7% (288/591) | 0.642              |
