# Supplementary material for: Comprehensive molecular profiling of 718 Multiple Myelomas reveals significant differences in mutation frequencies between African and European descent cases
Source: PubMed Central journal article supplement (PMC5699827; doi:10.1371/journal.pgen.1007087), 2017-11-22
Supplement: pgen.1007087.s009.pdf [file pgen.1007087.s009.pdf]

**S4 Table. Summary of Significantly Mutated Genes**

| GeneName  | African-American (Percent Mutation; n=127) | Caucasian (Percent Mutation n=591) | p-value (Fisher's) |
|-----------|--------------------------------------------|------------------------------------|--------------------|
| KRAS      | 26.8%                                      | 23.7%                              | 0.463              |
| NRAS      | 22.8%                                      | 21.3%                              | 0.707              |
| FAM46C    | 12.6%                                      | 8.3%                               | 0.093              |
| RYR1*     | 9.4%                                       | 4.9%                               | 0.045              |
| DIS3      | 7.9%                                       | 10.0%                              | 0.465              |
| RPL10*    | 4.7%                                       | 1.0%                               | 0.003              |
| PTCHD3*   | 4.7%                                       | 1.0%                               | 0.003              |
| BCL7A*    | 3.9%                                       | 0.8%                               | 0.007              |
| SPEF2*    | 3.9%                                       | 0.8%                               | 0.001              |
| SP140     | 3.9%                                       | 2.5%                               | 0.610              |
| BRAF      | 3.9%                                       | 8.3%                               | 0.092              |
| MAX       | 3.9%                                       | 2.2%                               | 0.319              |
| TRAF3     | 3.9%                                       | 6.9%                               | 0.430              |
| LRP1B     | 3.9%                                       | 6.6%                               | 0.257              |
| PRKD2     | 3.9%                                       | 2.4%                               | 0.319              |
| MYH13*    | 3.9%                                       | 0.8%                               | 0.007              |
| ABI3BP*   | 3.9%                                       | 1.0%                               | 0.015              |
| BRWD3*    | 3.9%                                       | 0.8%                               | 0.007              |
| GRM7*     | 3.9%                                       | 1.0%                               | 0.015              |
| AUTS2*    | 3.9%                                       | 1.2%                               | 0.028              |
| PARP4*    | 3.9%                                       | 1.0%                               | 0.015              |
| PLD1*     | 3.1%                                       | 0.3%                               | 0.002              |
| ANKRD26*  | 3.1%                                       | 0.2%                               | 0.0002             |
| SETD2     | 3.1%                                       | 2.5%                               | 0.697              |
| SAMHD1    | 2.4%                                       | 1.9%                               | 0.608              |
| CSMD3     | 3.1%                                       | 6.4%                               | 0.153              |
| DDX17*    | 3.1%                                       | 0.7%                               | 0.016              |
| STXBP4*   | 3.1%                                       | 0.0%                               | 0.00001            |
| RB1       | 2.4%                                       | 1.0%                               | 0.152              |
| CYLD      | 1.6%                                       | 2.5%                               | 0.518              |
| TP53*     | 1.6%                                       | 6.3%                               | 0.035              |
| HIST1H4B  | 1.6%                                       | 0.3%                               | 0.090              |
| TBC1D29   | 0.8%                                       | 1.7%                               | 0.452              |
| ZNF292    | 0.8%                                       | 2.9%                               | 0.172              |
| PABPC1    | 0.8%                                       | 2.7%                               | 0.226              |
| RPL5      | 0.8%                                       | 1.4%                               | 0.522              |
| FAM111B   | 0.0%                                       | 0.2%                               | 0.643              |
| FBXO4     | 0.0%                                       | 0.5%                               | 0.422              |
| TRIAP1    | 0.0%                                       | 0.2%                               | 0.643              |
| TGDS      | 0.0%                                       | 1.5%                               | 0.162              |
| KDM3B     | 0.0%                                       | 2.5%                               | 0.070              |
| HIST1H2BH | 0.0%                                       | 0.8%                               | 0.299              |
| WDR45     | 0.0%                                       | 1.0%                               | 0.255              |
| IRF4*     | 0.0%                                       | 3.2%                               | 0.041              |

\* = p<0.05
