# Supplementary material for: Comprehensive molecular profiling of 718 Multiple Myelomas reveals significant differences in mutation frequencies between African and European descent cases
Source: PLoS Genet. 2017 Nov 22;13(11):e1007087. doi: 10.1371/journal.pgen.1007087 (PMC5699827; doi:10.1371/journal.pgen.1007087)
Supplement: S2 Table — (RNAseq) used in this study. (XLSX) [file pgen.1007087.s007.xlsx]

## Sheet: SequencingStats
	S2 Table. Seqeuncing statistics matrix for Whole exome Seqeuncing (WES), and RNA sequencing (RNAseq) used in this study
				WES TUMOR
	Samples	picardTools.alignmentStats.PF_HQ_ALIGNED_BASES.PAIR	picardTools.hsStats.MEAN_TARGET_COVERAGE	picardTools.hsStats.PCT_TARGET_BASES_10X	picardTools.hsStats.PCT_TARGET_BASES_20X	picardTools.hsStats.PCT_TARGET_BASES_30X	picardTools.hsStats.PCT_TARGET_BASES_40X	picardTools.hsStats.PCT_TARGET_BASES_50X	picardTools.hsStats.PCT_TARGET_BASES_100X
	MMRF_1016	13528940565	101.489	0.983952	0.958255	0.91116	0.843464	0.762523	0.380342
	MMRF_1020	16613911942	107.757	0.985912	0.967148	0.932642	0.881624	0.817344	0.448028
	MMRF_1021	13092432378	87.6992	0.980915	0.948012	0.887317	0.802991	0.705965	0.302442
	MMRF_1029	13984248315	90.1407	0.979821	0.944562	0.882967	0.801289	0.708756	0.318174
	MMRF_1030	13740325078	90.0815	0.979777	0.949585	0.893713	0.814195	0.720543	0.31932
	MMRF_1031	12988199036	84.982	0.950243	0.913456	0.858609	0.785636	0.699789	0.276449
	MMRF_1032	16712611298	117.289	0.946313	0.917189	0.884674	0.844659	0.795551	0.490042
	MMRF_1037	17050116723	109.727	0.956906	0.932682	0.90005	0.855462	0.799485	0.428934
	MMRF_1038	15267693465	98.9209	0.956203	0.929898	0.893514	0.842862	0.7791	0.366715
	MMRF_1045	18990537934	139.656	0.986676	0.973787	0.951442	0.917775	0.872945	0.573133
	MMRF_1048	14229635072	113.119	0.982946	0.963264	0.928117	0.876739	0.812499	0.452828
	MMRF_1049	14525261829	113.769	0.981382	0.952868	0.904166	0.838988	0.764677	0.430489
	MMRF_1054	13254296469	102.836	0.981642	0.959896	0.92073	0.862147	0.788384	0.399137
	MMRF_1055	12082158245	97.6711	0.981412	0.94941	0.893505	0.818531	0.732869	0.357671
	MMRF_1068	15536879677	105.591	0.950269	0.921491	0.88687	0.84466	0.794323	0.458557
	MMRF_1073	20122616879	150.764	0.987022	0.974526	0.952391	0.919148	0.875268	0.59351
	MMRF_1077	15433219621	90.0322	0.949452	0.911317	0.862333	0.801421	0.730875	0.346192
	MMRF_1082	17379632621	87.7608	0.951591	0.915463	0.868637	0.809059	0.739932	0.336515
	MMRF_1085	14442959344	102.658	0.980144	0.952534	0.905142	0.840459	0.76456	0.397219
	MMRF_1086	19063885431	121.486	0.954116	0.928302	0.89781	0.860567	0.81683	0.534189
	MMRF_1089	38319430104	81.6613	0.984426	0.957881	0.911132	0.845024	0.765515	0.292165
	MMRF_1090	16202997647	103.482	0.983577	0.96133	0.919355	0.857091	0.780328	0.39506
	MMRF_1092	18445227066	107.468	0.956477	0.927077	0.890404	0.844315	0.789203	0.442745
	MMRF_1098	15654787870	118.196	0.985583	0.966448	0.932431	0.883409	0.822421	0.477583
	MMRF_1100	10431338911	68.9226	0.945819	0.88865	0.797199	0.681769	0.55807	0.172622
	MMRF_1107	14630048084	75.4827	0.946489	0.888028	0.795649	0.68238	0.567344	0.206014
	MMRF_1108	15051335044	93.3044	0.981619	0.950976	0.894869	0.817254	0.728291	0.337186
	MMRF_1112	16843743464	135.486	0.988048	0.974624	0.949913	0.912038	0.861918	0.552205
	MMRF_1127	13404880939	82.2901	0.981283	0.946683	0.882825	0.795126	0.694664	0.285169
	MMRF_1129	16444965521	89.8187	0.950902	0.906168	0.836844	0.751436	0.659581	0.289998
	MMRF_1131	15096190741	50.9646	0.973226	0.919307	0.80972	0.654969	0.481181	0.03286
	MMRF_1137	16454539980	111.275	0.986147	0.966898	0.931825	0.880316	0.815003	0.455873
	MMRF_1143	20477558294	151.372	0.989702	0.979814	0.962107	0.934669	0.897569	0.627034
	MMRF_1148	13436076823	90.3432	0.979198	0.943076	0.880053	0.797652	0.705799	0.321135
	MMRF_1151	13130284915	79.1872	0.947564	0.890233	0.803466	0.699243	0.590746	0.22811
	MMRF_1152	14502498549	82.8568	0.95219	0.905612	0.830982	0.734943	0.630787	0.249269
	MMRF_1153	18744180671	154.047	0.989508	0.980087	0.961391	0.932319	0.89374	0.63157
	MMRF_1155	15005255899	86.7398	0.98299	0.953365	0.899139	0.823965	0.735601	0.324759
	MMRF_1157	21901386877	157.521	0.988839	0.980707	0.966003	0.942937	0.911132	0.661301
	MMRF_1164	13732924747	90.8032	0.981479	0.954259	0.903029	0.827991	0.737162	0.324451
	MMRF_1167	16516402889	118.358	0.984455	0.959415	0.91715	0.860711	0.794899	0.461917
	MMRF_1169	21975050499	151.867	0.989293	0.97559	0.950862	0.914724	0.869599	0.601414
	MMRF_1171	12404593820	81.0429	0.980992	0.947326	0.885297	0.800531	0.702982	0.273869
	MMRF_1178	13865535114	111.812	0.982058	0.958811	0.918987	0.863081	0.795116	0.438922
	MMRF_1179	21566408129	172.409	0.988547	0.978978	0.962165	0.93714	0.904328	0.673732
	MMRF_1180	12521778655	82.4653	0.981546	0.952361	0.898397	0.821124	0.72791	0.291866
	MMRF_1184	18921185774	158.942	0.989223	0.980614	0.964316	0.938529	0.903352	0.648753
	MMRF_1185	14751181675	99.6674	0.986626	0.969408	0.93711	0.887943	0.823597	0.424633
	MMRF_1188	13605689833	75.5686	0.982107	0.949354	0.88733	0.800097	0.696616	0.242172
	MMRF_1189	10522977544	70.3077	0.944332	0.888233	0.799477	0.687422	0.567076	0.180935
	MMRF_1195	11290541643	75.4527	0.945148	0.885437	0.793888	0.683116	0.569525	0.20831
	MMRF_1202	14112501638	108.868	0.981333	0.958161	0.918083	0.861505	0.792459	0.428412
	MMRF_1205	19376417782	121.759	0.987126	0.974133	0.950335	0.912592	0.861127	0.524729
	MMRF_1216	22815811896	181.444	0.986291	0.977357	0.963931	0.944456	0.918294	0.70863
	MMRF_1231	14969140441	111.604	0.944753	0.915963	0.883519	0.842173	0.789943	0.465636
	MMRF_1232	14750794608	95.0589	0.981898	0.952158	0.899013	0.82523	0.739494	0.35771
	MMRF_1250	15492081129	101.191	0.980232	0.947946	0.892751	0.821061	0.740791	0.381069
	MMRF_1251	16859821947	61.7385	0.937318	0.897773	0.836084	0.749327	0.643603	0.106384
	MMRF_1257	14786728796	77.9379	0.942753	0.900974	0.839773	0.761058	0.670079	0.257442
	MMRF_1267	10537548476	75.5653	0.920934	0.875765	0.812869	0.73199	0.638915	0.236769
	MMRF_1269	18771144607	129.535	0.956926	0.934932	0.909004	0.876866	0.83703	0.544777
	MMRF_1270	12206625797	83.8241	0.979652	0.948618	0.891829	0.814319	0.72474	0.311484
	MMRF_1274	18738649415	126.375	0.944848	0.923619	0.897659	0.863985	0.822518	0.547215
	MMRF_1283	15165561726	93.5146	0.983985	0.960044	0.91363	0.845537	0.762211	0.362439
	MMRF_1284	13024994311	95.7947	0.978953	0.946858	0.892051	0.818137	0.732925	0.355892
	MMRF_1285	19582563731	158.932	0.989695	0.98084	0.963879	0.937227	0.90193	0.653678
	MMRF_1286	14550035135	104.582	0.984298	0.961267	0.919718	0.859312	0.784624	0.400851
	MMRF_1309	17390221155	122.741	0.985023	0.967517	0.936051	0.889695	0.83116	0.492949
	MMRF_1311	13620663696	44.4019	0.92901	0.866069	0.757334	0.603147	0.41385	0.00753
	MMRF_1318	17310823630	141.672	0.986374	0.972268	0.948619	0.913692	0.868716	0.578646
	MMRF_1323	11915563518	83.6181	0.981398	0.951147	0.895464	0.817474	0.724377	0.300584
	MMRF_1327	13029529285	89.5405	0.937029	0.895055	0.841915	0.775489	0.699524	0.342441
	MMRF_1328	12274352017	86.8848	0.982479	0.954797	0.903693	0.831564	0.745134	0.3154
	MMRF_1331	12639267326	83.1304	0.98261	0.94962	0.890213	0.809501	0.716666	0.300787
	MMRF_1332	17984767756	148.655	0.99027	0.979295	0.958165	0.926108	0.884907	0.618003
	MMRF_1338	9495623567	55.6531	0.972717	0.907247	0.78943	0.640795	0.493386	0.098964
	MMRF_1339	15855407022	28.4537	0.943129	0.730246	0.419811	0.181963	0.067818	0.000635
	MMRF_1342	9712261690	60.2852	0.964147	0.878104	0.751913	0.615953	0.491708	0.146225
	MMRF_1344	16424842486	94.2505	0.983911	0.962005	0.919365	0.854626	0.773065	0.361942
	MMRF_1348	12273548176	55.108	0.980715	0.937375	0.845188	0.709105	0.550267	0.048447
	MMRF_1349	20104194933	154.911	0.985239	0.973203	0.954205	0.926939	0.891017	0.636258
	MMRF_1352	10013752627	56.0381	0.974155	0.914451	0.803231	0.658564	0.509107	0.094951
	MMRF_1354	7037193638	52.114	0.95492	0.841719	0.684424	0.529173	0.400182	0.102449
	MMRF_1355	17024041683	138.474	0.985878	0.970691	0.945166	0.908044	0.860477	0.562529
	MMRF_1356	11377631553	77.5714	0.977469	0.933209	0.862315	0.773363	0.675964	0.271433
	MMRF_1358	21697430692	136.7	0.986011	0.972076	0.948082	0.911978	0.864412	0.556841
	MMRF_1360	22711392812	91.6882	0.984483	0.964444	0.928238	0.874351	0.804119	0.37421
	MMRF_1361	18474192341	148.833	0.984587	0.970898	0.948159	0.915073	0.872958	0.599525
	MMRF_1365	11386598552	79.1892	0.980634	0.949913	0.893419	0.813535	0.717267	0.273107
	MMRF_1371	16914506564	80.781	0.981188	0.948727	0.892253	0.81573	0.724886	0.28803
	MMRF_1377	21201395152	103.596	0.982928	0.960909	0.92371	0.871557	0.808064	0.454996
	MMRF_1380	11348064820	73.1236	0.975523	0.925174	0.840485	0.736458	0.626333	0.22596
	MMRF_1383	14008654052	85.3847	0.978581	0.938823	0.873657	0.789574	0.695842	0.306558
	MMRF_1386	9194068587	73.4603	0.975138	0.92852	0.84577	0.737065	0.620042	0.2187
	MMRF_1388	12390958624	81.6632	0.977215	0.934443	0.860734	0.767921	0.668013	0.276249
	MMRF_1389	13977068225	85.1161	0.982469	0.958243	0.910713	0.838085	0.746631	0.304658
	MMRF_1393	14750194291	123.125	0.981611	0.961667	0.928255	0.880473	0.821127	0.489934
	MMRF_1395	8850428026	73.0314	0.969111	0.906468	0.808493	0.694353	0.581488	0.219235
	MMRF_1401	19850281091	159.379	0.986738	0.975307	0.956655	0.9295	0.894047	0.645311
	MMRF_1407	17951729804	112.485	0.987867	0.9739	0.948201	0.907949	0.853719	0.489653
	MMRF_1408	13481146458	81.5909	0.97969	0.945749	0.883385	0.797178	0.698232	0.280511
	MMRF_1413	15909250481	132.028	0.981313	0.960897	0.927707	0.882212	0.827148	0.521453
	MMRF_1423	15328206989	106.039	0.983777	0.957436	0.911621	0.850194	0.778397	0.428694
	MMRF_1424	17295314880	135.818	0.984208	0.968687	0.942652	0.905018	0.85742	0.558512
	MMRF_1425	14479320277	118.048	0.98396	0.962632	0.925545	0.872735	0.808617	0.467076
	MMRF_1426	15363024390	116.407	0.982522	0.961916	0.926052	0.874242	0.809964	0.460481
	MMRF_1431	16550604621	118.892	0.986754	0.968992	0.936069	0.886984	0.824411	0.477483
	MMRF_1432	18827252800	147.898	0.98491	0.969496	0.94425	0.908304	0.863629	0.587844
	MMRF_1433	8990908687	72.1844	0.971168	0.915185	0.822744	0.709313	0.59238	0.208297
	MMRF_1434	16704164509	134.171	0.985129	0.971857	0.949034	0.914559	0.868418	0.55744
	MMRF_1436	16609760922	129.962	0.984543	0.967711	0.939354	0.898357	0.846098	0.528912
	MMRF_1439	17792010757	145.036	0.985485	0.972639	0.951135	0.919488	0.877915	0.598112
	MMRF_1445	16374488883	119.189	0.983128	0.963024	0.927977	0.878373	0.817845	0.485194
	MMRF_1446	18564496254	136.508	0.986044	0.972263	0.9491	0.91482	0.870051	0.570838
	MMRF_1447	14202664921	110.147	0.981403	0.953063	0.905215	0.840883	0.766574	0.419648
	MMRF_1450	16840470229	133.64	0.983822	0.96674	0.937539	0.895945	0.844194	0.540477
	MMRF_1451	14861735719	121.097	0.983909	0.962892	0.926276	0.87505	0.813645	0.484838
	MMRF_1453	17733327115	107.039	0.985028	0.962732	0.921346	0.862326	0.790873	0.422652
	MMRF_1454	15492820062	125.861	0.983486	0.966187	0.936155	0.892955	0.838166	0.511946
	MMRF_1460	18902170587	150.754	0.985376	0.971602	0.949205	0.916761	0.875182	0.606215
	MMRF_1461	15959888502	130.29	0.985741	0.970312	0.943991	0.905433	0.855636	0.538855
	MMRF_1466	13372299707	102.641	0.979608	0.951736	0.902669	0.834573	0.754175	0.385145
	MMRF_1474	17795622912	140.637	0.986021	0.970879	0.944724	0.906765	0.858308	0.562933
	MMRF_1484	11465557271	90.8997	0.982785	0.953612	0.899107	0.820647	0.727433	0.320573
	MMRF_1485	14709179424	92.6871	0.982031	0.949925	0.892309	0.812964	0.721539	0.330142
	MMRF_1486	18376130572	112.63	0.986936	0.971315	0.942619	0.899209	0.84241	0.487682
	MMRF_1489	14036849308	116.178	0.982148	0.95744	0.915013	0.855997	0.786358	0.445894
	MMRF_1491	16278195001	106.53	0.982094	0.95519	0.906974	0.841005	0.76457	0.406732
	MMRF_1496	15972764161	109.766	0.981371	0.956507	0.914435	0.856945	0.788919	0.440225
	MMRF_1497	6842487210	57.855	0.959754	0.869381	0.73521	0.5916	0.462197	0.130013
	MMRF_1499	11081614946	79.715	0.973707	0.920749	0.830663	0.721827	0.61321	0.254501
	MMRF_1500	14685552033	88.3035	0.983021	0.957325	0.909439	0.838491	0.751041	0.330013
	MMRF_1501	23824451460	147.862	0.986513	0.973556	0.951299	0.91841	0.875551	0.594154
	MMRF_1502	16014551772	101.989	0.980148	0.949577	0.896618	0.825607	0.74444	0.377633
	MMRF_1505	17105706215	117.608	0.986371	0.970501	0.942076	0.900004	0.845075	0.502433
	MMRF_1506	10286536618	77.0339	0.974118	0.919949	0.831353	0.725251	0.616934	0.238524
	MMRF_1511	12447536213	97.1161	0.98265	0.953463	0.900006	0.825235	0.738396	0.352931
	MMRF_1516	12520223091	94.9653	0.982706	0.956984	0.908527	0.837499	0.751278	0.345362
	MMRF_1518	15044605042	121.939	0.983325	0.963116	0.927269	0.87553	0.81196	0.47944
	MMRF_1519	12287126741	101.123	0.978953	0.946021	0.891971	0.821274	0.741346	0.377389
	MMRF_1520	15448121990	111.83	0.984517	0.961349	0.91917	0.860328	0.790006	0.438466
	MMRF_1522	13627781055	107.858	0.982051	0.960936	0.922055	0.863718	0.790532	0.414585
	MMRF_1523	17538012936	118.634	0.986009	0.968947	0.937761	0.891305	0.83199	0.485874
	MMRF_1525	17314495069	124.375	0.986687	0.972815	0.947422	0.907941	0.855213	0.521929
	MMRF_1531	24079198434	174.781	0.9887	0.979759	0.96501	0.943254	0.914088	0.692313
	MMRF_1533	15179189387	108.873	0.981698	0.955447	0.909749	0.84771	0.77589	0.426062
	MMRF_1534	10956815473	82.8324	0.978733	0.943281	0.878762	0.789825	0.687986	0.276777
	MMRF_1535	14692831246	27.7097	0.947219	0.729815	0.397043	0.156331	0.051431	0.000491
	MMRF_1538	13027359129	101.448	0.983973	0.957441	0.908498	0.839395	0.757543	0.37888
	MMRF_1539	17039531642	135.483	0.986032	0.973282	0.950902	0.917186	0.871937	0.563722
	MMRF_1540	16236232336	129.176	0.98545	0.971852	0.947889	0.910928	0.861174	0.535083
	MMRF_1541	16405702105	103.824	0.98627	0.969287	0.937522	0.888688	0.824118	0.434225
	MMRF_1542	12536781557	99.8641	0.980778	0.955164	0.909435	0.843962	0.76424	0.378013
	MMRF_1543	16263285786	123.587	0.984963	0.965471	0.930771	0.882008	0.822276	0.49891
	MMRF_1546	20706683857	165.236	0.989643	0.979085	0.959604	0.930569	0.893003	0.645567
	MMRF_1547	18983637124	147.777	0.990222	0.979996	0.959846	0.928207	0.885676	0.605916
	MMRF_1550	12879647908	103.656	0.980497	0.951758	0.901918	0.83378	0.754246	0.387969
	MMRF_1555	16153575888	111.405	0.985932	0.967653	0.933008	0.881485	0.815664	0.453225
	MMRF_1556	10703057814	84.4661	0.98192	0.948587	0.886159	0.798135	0.696258	0.282324
	MMRF_1560	17086829438	134.452	0.986112	0.970714	0.943763	0.904205	0.853774	0.544956
	MMRF_1564	13007879369	90.5348	0.981757	0.950129	0.892702	0.813373	0.722444	0.332809
	MMRF_1565	19332265174	135.008	0.987716	0.977498	0.959596	0.93095	0.890246	0.582459
	MMRF_1568	15424651782	107.932	0.984911	0.96511	0.928688	0.874945	0.807178	0.438502
	MMRF_1569	14378965472	100.278	0.984759	0.959818	0.913372	0.847071	0.76674	0.388101
	MMRF_1570	12146007626	98.3179	0.980597	0.956205	0.910556	0.842791	0.759269	0.363882
	MMRF_1572	12591669680	99.75	0.980602	0.951543	0.900028	0.829614	0.748698	0.376427
	MMRF_1573	11558162214	93.02	0.978968	0.94859	0.892986	0.814777	0.723904	0.333718
	MMRF_1574	13586306723	109.342	0.981267	0.957145	0.91447	0.854499	0.782396	0.421357
	MMRF_1576	18051823894	126.233	0.987252	0.973011	0.946311	0.905824	0.853483	0.530661
	MMRF_1577	13794322865	110.924	0.980962	0.959423	0.921104	0.865124	0.795483	0.433079
	MMRF_1579	14907843930	118.685	0.984077	0.966513	0.934786	0.887238	0.825823	0.473858
	MMRF_1580	15476500498	123.587	0.98335	0.966455	0.938138	0.896334	0.842203	0.508338
	MMRF_1583	11900393784	96.8513	0.976601	0.941248	0.88159	0.80495	0.721315	0.357704
	MMRF_1586	11377953517	91.9756	0.978315	0.947049	0.891769	0.815439	0.726378	0.330029
	MMRF_1587	18415866677	143.913	0.986468	0.973128	0.950559	0.916893	0.873681	0.591393
	MMRF_1588	16762549419	110.564	0.985938	0.967973	0.935268	0.886414	0.823577	0.462115
	MMRF_1589	20189270221	145.857	0.9872	0.97527	0.955017	0.924382	0.883443	0.600513
	MMRF_1593	18879243282	149.453	0.986231	0.972108	0.948541	0.914977	0.872292	0.597587
	MMRF_1595	13376176803	105.767	0.98014	0.954488	0.909498	0.847108	0.77318	0.407866
	MMRF_1596	23280559988	173.849	0.98835	0.978472	0.961937	0.937372	0.905093	0.674758
	MMRF_1597	15292338597	118.018	0.986081	0.965923	0.929194	0.876081	0.810442	0.469113
	MMRF_1598	18628312335	146.839	0.986981	0.974992	0.953998	0.922261	0.879934	0.5951
	MMRF_1601	15860865950	114.821	0.985002	0.970205	0.943975	0.902668	0.846012	0.48115
	MMRF_1603	13670403357	108.747	0.982775	0.959248	0.917731	0.859009	0.787884	0.424927
	MMRF_1605	17578371553	134.462	0.984546	0.969034	0.94213	0.903147	0.853684	0.549493
	MMRF_1607	15163306265	106.074	0.984446	0.963039	0.924406	0.868225	0.797722	0.426183
	MMRF_1608	16267128068	118.546	0.986189	0.967288	0.933292	0.883709	0.821633	0.478806
	MMRF_1610	14521147413	103.093	0.985989	0.965392	0.927067	0.870591	0.799569	0.417547
	MMRF_1613	19426636437	154.811	0.986033	0.972239	0.948829	0.915431	0.873266	0.607132
	MMRF_1614	17369729851	139.3	0.985441	0.966496	0.934459	0.889916	0.835516	0.537511
	MMRF_1617	18973717603	149.291	0.988255	0.976479	0.955854	0.925268	0.88488	0.606315
	MMRF_1618	18912077013	149.264	0.986276	0.972358	0.948304	0.913171	0.868389	0.587426
	MMRF_1621	18297915081	145.22	0.985863	0.968824	0.939758	0.899006	0.84895	0.561575
	MMRF_1622	19772037900	118.349	0.988144	0.973391	0.945117	0.90188	0.845197	0.50353
	MMRF_1624	20781935045	138.859	0.986907	0.971462	0.944219	0.904815	0.855463	0.557557
	MMRF_1625	18840743461	151.718	0.987632	0.973252	0.94884	0.913388	0.868417	0.592597
	MMRF_1627	20135381448	136.5	0.985415	0.971465	0.947359	0.911495	0.864328	0.55769
	MMRF_1628	13503042404	95.8068	0.9814	0.953206	0.902493	0.831422	0.747828	0.361924
	MMRF_1629	16269566018	112.485	0.985761	0.967244	0.933216	0.882937	0.818996	0.460346
	MMRF_1630	16135483081	112.118	0.983839	0.962627	0.924536	0.868846	0.799621	0.435181
	MMRF_1633	16950943237	124.151	0.984039	0.966713	0.935773	0.889285	0.829754	0.491838
	MMRF_1634	16215861772	129.667	0.986187	0.968276	0.937105	0.892628	0.837757	0.523512
	MMRF_1637	16940441116	119.334	0.984302	0.967159	0.936323	0.891149	0.833156	0.489088
	MMRF_1638	17119228132	138.216	0.988972	0.976741	0.953932	0.918401	0.8712	0.568017
	MMRF_1639	10677305701	72.2475	0.971921	0.918807	0.828238	0.715043	0.598134	0.210522
	MMRF_1640	13526009266	98.2039	0.980354	0.945481	0.886171	0.80864	0.722402	0.356135
	MMRF_1641	13775676942	94.0045	0.979386	0.94338	0.881361	0.799059	0.707209	0.331431
	MMRF_1642	14248392901	91.3955	0.983471	0.957484	0.909648	0.840449	0.755392	0.346385
	MMRF_1643	14186159808	96.8609	0.981554	0.949916	0.893808	0.816514	0.728189	0.347954
	MMRF_1644	15975946584	109.291	0.982861	0.959968	0.91949	0.861109	0.789073	0.420755
	MMRF_1645	17354822133	140.983	0.985277	0.972346	0.951437	0.920665	0.879595	0.590515
	MMRF_1646	15485835569	111.054	0.982682	0.958273	0.915966	0.856883	0.786036	0.431195
	MMRF_1647	13858997824	97.3041	0.984027	0.960968	0.918949	0.856713	0.778516	0.37712
	MMRF_1650	14887589152	98.6666	0.984778	0.96554	0.929325	0.873283	0.800651	0.397937
	MMRF_1651	13260558437	107.863	0.980269	0.949793	0.899764	0.834003	0.759231	0.409811
	MMRF_1652	12386468849	98.9752	0.979985	0.951628	0.90165	0.831242	0.748016	0.363808
	MMRF_1654	14486151691	96.4141	0.984196	0.960871	0.918052	0.854862	0.776504	0.380288
	MMRF_1655	13412026526	95.401	0.982638	0.954415	0.902919	0.830729	0.745302	0.363201
	MMRF_1656	13130903386	104.778	0.979502	0.951168	0.90277	0.836806	0.759627	0.394985
	MMRF_1659	20061529286	152.332	0.984116	0.971112	0.95004	0.919269	0.879242	0.610227
	MMRF_1662	15710023309	110.527	0.984984	0.963913	0.926331	0.872444	0.805352	0.448333
	MMRF_1664	19900770020	153.477	0.986846	0.975174	0.956025	0.927984	0.891199	0.633188
	MMRF_1665	13486903797	110.143	0.979472	0.951578	0.904465	0.84044	0.766149	0.415949
	MMRF_1667	14083509279	98.3863	0.984224	0.962925	0.921949	0.859567	0.780499	0.381747
	MMRF_1668	19450843599	150.765	0.986995	0.974882	0.95441	0.924084	0.884425	0.617285
	MMRF_1670	15488158093	106.355	0.985852	0.965168	0.926742	0.870001	0.798836	0.425654
	MMRF_1671	16511463159	114.828	0.987715	0.971524	0.941186	0.894867	0.834451	0.475306
	MMRF_1672	18154216349	124.911	0.984578	0.966883	0.935933	0.89112	0.834868	0.513537
	MMRF_1676	14454859540	96.5994	0.983903	0.958623	0.910451	0.840977	0.757005	0.3691
	MMRF_1677	21505070423	149.042	0.988087	0.978247	0.96213	0.937756	0.904354	0.642733
	MMRF_1678	16823155743	106.942	0.98597	0.967808	0.934668	0.884588	0.819764	0.446885
	MMRF_1680	17182682290	122.6	0.984532	0.966996	0.936377	0.891568	0.836077	0.511042
	MMRF_1682	16343988065	109.071	0.985808	0.967959	0.93574	0.887436	0.82456	0.455574
	MMRF_1683	16910069242	123.026	0.983987	0.966263	0.935522	0.891069	0.83465	0.498063
	MMRF_1686	13280431916	90.2082	0.98237	0.956314	0.905864	0.831002	0.739997	0.333988
	MMRF_1687	15707753981	109.978	0.985556	0.96708	0.933375	0.88335	0.819445	0.453845
	MMRF_1689	20144531706	149.94	0.985818	0.971801	0.948676	0.915519	0.873533	0.605629
	MMRF_1690	16342283769	109.812	0.984778	0.966353	0.932067	0.879711	0.812662	0.44865
	MMRF_1695	16653132529	120.011	0.9857	0.968897	0.939169	0.894956	0.837845	0.49198
	MMRF_1698	16923842157	116.526	0.985977	0.971502	0.944668	0.901891	0.844233	0.490541
	MMRF_1700	15777353920	108.704	0.985453	0.962184	0.919832	0.861148	0.791281	0.436537
	MMRF_1703	16713223384	114.425	0.986873	0.971156	0.942712	0.899277	0.842031	0.482515
	MMRF_1705	16961529187	110.218	0.986639	0.970843	0.942336	0.898436	0.840172	0.473684
	MMRF_1706	15640606325	107.963	0.986687	0.967918	0.933127	0.881252	0.815035	0.443617
	MMRF_1710	17032993215	121.399	0.988214	0.976848	0.954767	0.918504	0.867899	0.51982
	MMRF_1713	18711114812	141.545	0.983629	0.968075	0.941716	0.903837	0.85604	0.566475
	MMRF_1714	14551377268	102.078	0.983047	0.957823	0.912706	0.848676	0.771678	0.391827
	MMRF_1715	20222828570	165.402	0.985485	0.97503	0.958753	0.93482	0.903181	0.66957
	MMRF_1716	15880626401	107.187	0.984294	0.965484	0.930784	0.877802	0.809814	0.437664
	MMRF_1717	16175064804	86.4154	0.983168	0.956627	0.905964	0.832127	0.741834	0.313409
	MMRF_1718	32394231586	262.723	0.990318	0.98556	0.979699	0.971989	0.961994	0.868103
	MMRF_1719	14918596784	111.122	0.982559	0.958714	0.917121	0.858255	0.786698	0.430142
	MMRF_1720	18110525988	145.525	0.986035	0.973922	0.954325	0.925171	0.886152	0.607728
	MMRF_1721	16157479586	115.662	0.985133	0.967266	0.935385	0.887999	0.827489	0.474149
	MMRF_1722	19053839483	142.936	0.985836	0.973484	0.953792	0.924582	0.88547	0.60469
	MMRF_1723	19720854940	123.045	0.986498	0.971558	0.944153	0.902968	0.85007	0.523933
	MMRF_1725	16861630766	118.921	0.986724	0.970001	0.939743	0.895203	0.838635	0.501154
	MMRF_1726	17359742276	114.918	0.985608	0.963843	0.924437	0.869002	0.802247	0.458068
	MMRF_1727	17725416383	124.668	0.986206	0.971452	0.946155	0.907564	0.856085	0.520092
	MMRF_1730	18233522820	130.379	0.985881	0.970209	0.942925	0.902812	0.851469	0.535421
	MMRF_1731	16070505376	111.851	0.985182	0.968504	0.937971	0.891614	0.831134	0.467272
	MMRF_1733	15884134703	110.495	0.984541	0.961704	0.921305	0.863633	0.793285	0.435028
	MMRF_1735	20700609506	133.239	0.987641	0.974248	0.949753	0.912038	0.862197	0.548419
	MMRF_1736	17530484815	123.26	0.985819	0.967873	0.936068	0.890853	0.834681	0.508343
	MMRF_1738	15372164151	108.306	0.981579	0.957546	0.914941	0.855373	0.784183	0.423856
	MMRF_1739	21093057787	131.057	0.987232	0.97541	0.953317	0.918422	0.87066	0.552937
	MMRF_1740	15865927674	116.25	0.989048	0.974477	0.944918	0.89894	0.838493	0.48328
	MMRF_1744	18293864501	117.436	0.985805	0.970038	0.940662	0.89654	0.839582	0.491451
	MMRF_1746	16040941420	113.005	0.984718	0.968632	0.939645	0.894864	0.835502	0.469948
	MMRF_1749	16748648214	120.399	0.984688	0.965529	0.931112	0.880235	0.817521	0.488092
	MMRF_1750	16585917965	111.767	0.985784	0.970346	0.941937	0.897754	0.838638	0.469866
	MMRF_1753	16090576051	111.228	0.986959	0.970254	0.939861	0.893685	0.833145	0.467962
	MMRF_1755	17389287203	134.543	0.986062	0.969993	0.942199	0.90173	0.850225	0.542138
	MMRF_1758	21955542027	159.634	0.986766	0.975652	0.957139	0.92962	0.893249	0.640016
	MMRF_1759	17045582583	123.473	0.986168	0.970129	0.941063	0.897364	0.841078	0.505211
	MMRF_1760	21778403700	173.265	0.990353	0.982914	0.970013	0.949997	0.922065	0.696322
	MMRF_1761	15923053402	112.153	0.984431	0.962649	0.924045	0.868735	0.800969	0.449372
	MMRF_1763	19972394701	124.31	0.988192	0.975191	0.951238	0.91451	0.865842	0.543069
	MMRF_1766	16422474280	110.438	0.985426	0.967002	0.933951	0.88445	0.820592	0.457186
	MMRF_1768	13120509769	96.1391	0.977988	0.943301	0.88572	0.810806	0.726077	0.355975
	MMRF_1773	15672476466	117.73	0.984806	0.96574	0.932663	0.884808	0.824576	0.478501
	MMRF_1774	17063828974	117.496	0.986645	0.971513	0.943749	0.901534	0.846007	0.496928
	MMRF_1775	18453145757	133.376	0.987051	0.972508	0.947257	0.909503	0.860159	0.549014
	MMRF_1777	16869010092	120.603	0.983774	0.967373	0.938847	0.895583	0.838833	0.49718
	MMRF_1778	16053707853	114.81	0.98494	0.96646	0.932934	0.883511	0.821581	0.468128
	MMRF_1780	13842600110	95.7798	0.98333	0.958063	0.911709	0.844488	0.76221	0.362405
	MMRF_1781	18322130529	119.585	0.986218	0.971449	0.944306	0.902857	0.848706	0.508982
	MMRF_1782	16588980123	117.943	0.983399	0.965113	0.933351	0.88719	0.828251	0.484621
	MMRF_1783	17475156196	117.5	0.988062	0.972577	0.944085	0.901038	0.845331	0.502306
	MMRF_1784	19857977497	122.502	0.988092	0.974252	0.94871	0.909538	0.858052	0.52692
	MMRF_1786	20846533477	153.732	0.987064	0.976295	0.958113	0.930728	0.893798	0.627543
	MMRF_1787	20503304625	138.498	0.988326	0.976193	0.954897	0.922592	0.879627	0.584072
	MMRF_1790	19820831535	134.305	0.986921	0.976208	0.958595	0.93095	0.891794	0.585657
	MMRF_1792	18541694561	127.124	0.984787	0.968948	0.941067	0.899425	0.845704	0.523949
	MMRF_1793	18505714142	126.828	0.986785	0.972485	0.946721	0.908196	0.857613	0.535475
	MMRF_1794	15757316223	104.823	0.985891	0.966226	0.930186	0.877061	0.810174	0.432907
	MMRF_1795	17471839590	125.753	0.98445	0.966323	0.934699	0.888894	0.831505	0.508089
	MMRF_1796	17810517655	124.929	0.986077	0.972029	0.947083	0.908301	0.856423	0.520036
	MMRF_1797	17603477748	122.056	0.986393	0.970247	0.942011	0.899987	0.845892	0.512352
	MMRF_1801	14749466396	102.22	0.985287	0.963895	0.924205	0.866701	0.795241	0.412804
	MMRF_1802	17867026841	112.079	0.986792	0.967931	0.932853	0.881203	0.816096	0.46071
	MMRF_1803	20390400327	127.698	0.987964	0.974349	0.949366	0.912029	0.863366	0.553724
	MMRF_1807	15066358134	92.3781	0.984491	0.957518	0.907415	0.836387	0.751425	0.354216
	MMRF_1808	17037942674	122.141	0.985628	0.96814	0.937725	0.892527	0.834279	0.49373
	MMRF_1810	16805816112	122.971	0.983819	0.964529	0.931471	0.884507	0.826571	0.500317
	MMRF_1814	12962799874	93.556	0.97918	0.944074	0.882709	0.800784	0.708787	0.333653
	MMRF_1815	16656023948	119.399	0.984249	0.965821	0.933523	0.887046	0.828636	0.48977
	MMRF_1816	12958784127	87.7106	0.979916	0.943098	0.878009	0.792862	0.698735	0.313029
	MMRF_1819	16154509020	31.2268	0.966763	0.826274	0.526921	0.231799	0.075276	0.000387
	MMRF_1820	16787225883	106.633	0.986263	0.970629	0.940642	0.892761	0.828113	0.443996
	MMRF_1822	17389140095	127.657	0.984797	0.969526	0.943515	0.905182	0.855215	0.533009
	MMRF_1824	20732637240	140.863	0.987067	0.976688	0.959507	0.932738	0.894889	0.603256
	MMRF_1825	15896313840	116.884	0.98269	0.961713	0.925521	0.874225	0.811124	0.469579
	MMRF_1830	13252429320	101.976	0.979718	0.950077	0.898976	0.829995	0.750365	0.382839
	MMRF_1831	15858139385	111.141	0.984758	0.962087	0.921083	0.862589	0.791924	0.435633
	MMRF_1832	14211111364	96.1115	0.984135	0.960669	0.917048	0.854153	0.776492	0.379806
	MMRF_1833	14841498870	100.256	0.982673	0.954239	0.905161	0.838537	0.760589	0.390121
	MMRF_1834	16487984373	104.185	0.985353	0.967744	0.933667	0.880005	0.809867	0.422262
	MMRF_1835	17967872941	131.155	0.98769	0.975384	0.953921	0.920917	0.876217	0.559817
	MMRF_1838	18323452789	126.411	0.987397	0.973806	0.950387	0.914612	0.866227	0.534465
	MMRF_1839	16088116445	107.472	0.98415	0.963769	0.925632	0.869023	0.798856	0.432061
	MMRF_1841	18304152497	114.696	0.985261	0.969454	0.940308	0.896059	0.838159	0.486004
	MMRF_1842	15714938881	108.471	0.985456	0.966941	0.93346	0.88385	0.820424	0.45003
	MMRF_1846	14647271571	101.389	0.983293	0.957625	0.912287	0.848958	0.773374	0.40086
	MMRF_1847	15582618833	108.35	0.98359	0.961294	0.921573	0.865362	0.797791	0.439903
	MMRF_1850	16257861816	103.874	0.985526	0.965239	0.927736	0.871817	0.801207	0.422663
	MMRF_1851	12002586924	82.6396	0.979763	0.941861	0.87472	0.784301	0.681941	0.272986
	MMRF_1855	13722431114	90.4479	0.980216	0.951444	0.900129	0.8284	0.742979	0.339256
	MMRF_1856	14153622305	97.0491	0.983719	0.96213	0.922429	0.862735	0.786189	0.38205
	MMRF_1857	15766305780	108.711	0.984803	0.9646	0.928209	0.874409	0.806815	0.440799
	MMRF_1858	15017404230	101.179	0.983921	0.959903	0.916609	0.85529	0.78125	0.402523
	MMRF_1859	16807569204	117.308	0.987164	0.969307	0.935692	0.886218	0.823797	0.476892
	MMRF_1860	17472463712	128.246	0.987906	0.973563	0.947572	0.908206	0.856256	0.529629
	MMRF_1861	16147200782	113.341	0.985212	0.968405	0.937559	0.889135	0.82543	0.456374
	MMRF_1862	20155499573	136.147	0.986592	0.975682	0.957559	0.929412	0.889918	0.587019
	MMRF_1865	14965120875	110.156	0.98444	0.963393	0.924731	0.868083	0.79781	0.434284
	MMRF_1866	10085536587	80.5198	0.975954	0.929795	0.851768	0.752216	0.645839	0.262969
	MMRF_1867	15168801421	99.7503	0.984109	0.964585	0.927051	0.869105	0.794211	0.397428
	MMRF_1871	14646160826	104.753	0.982785	0.95649	0.90941	0.843519	0.765431	0.400129
	MMRF_1873	16591077255	103.924	0.983243	0.957754	0.912115	0.85052	0.77936	0.423088
	MMRF_1876	17785216670	128.494	0.987127	0.972422	0.944883	0.903671	0.850389	0.526161
	MMRF_1879	16931639171	108.441	0.986103	0.969509	0.939424	0.893825	0.834005	0.461653
	MMRF_1880	18836490599	131.357	0.986056	0.972759	0.94916	0.912116	0.86198	0.539097
	MMRF_1881	15806511967	103.064	0.98475	0.964178	0.926572	0.870611	0.800333	0.418561
	MMRF_1882	15399302864	104.44	0.984541	0.962973	0.923663	0.865447	0.79291	0.414552
	MMRF_1886	15403217832	102.46	0.984654	0.963043	0.923767	0.866278	0.793964	0.405387
	MMRF_1888	14955307099	118.092	0.983679	0.962412	0.923845	0.867683	0.798869	0.457184
	MMRF_1889	20643796007	145.194	0.986687	0.974839	0.954986	0.925331	0.885438	0.603176
	MMRF_1890	17026921021	122.001	0.984869	0.965673	0.929887	0.87799	0.814535	0.48449
	MMRF_1891	17960855743	122.603	0.986757	0.970168	0.940587	0.896869	0.840646	0.502681
	MMRF_1893	18721972962	139.246	0.988284	0.974416	0.949538	0.912422	0.864566	0.565368
	MMRF_1895	13374621408	94.2219	0.981921	0.95152	0.896357	0.819351	0.729979	0.346987
	MMRF_1897	15054085868	33.9739	0.968867	0.850203	0.612556	0.316555	0.112322	0.001097
	MMRF_1900	16846701505	125.321	0.986739	0.968159	0.934162	0.884502	0.823026	0.496518
	MMRF_1906	16811274228	114.158	0.986457	0.970694	0.942122	0.898983	0.842202	0.484257
	MMRF_1908	18603440168	138.474	0.986093	0.970497	0.943119	0.90325	0.853098	0.554728
	MMRF_1910	20538732193	102.412	0.985993	0.971755	0.945594	0.903981	0.846637	0.452412
	MMRF_1911	20652920819	140.43	0.98817	0.976646	0.957092	0.927442	0.88765	0.602313
	MMRF_1912	15389246137	87.4261	0.984796	0.962086	0.918487	0.851908	0.766857	0.328304
	MMRF_1915	21320782952	145.038	0.987033	0.976874	0.9601	0.933937	0.897248	0.614361
	MMRF_1916	14016698459	109.181	0.983775	0.960804	0.918494	0.856898	0.781841	0.422884
	MMRF_1917	16720609880	110.907	0.98632	0.97041	0.941558	0.897909	0.840359	0.476011
	MMRF_1918	16938217015	133.193	0.986207	0.971712	0.945962	0.907274	0.856334	0.541069
	MMRF_1921	16726976738	110.172	0.98587	0.967842	0.934697	0.885064	0.82137	0.456883
	MMRF_1922	13023796422	89.3679	0.981467	0.94678	0.885197	0.802373	0.708595	0.322387
	MMRF_1923	18242736391	74.3978	0.98584	0.965	0.918501	0.840777	0.73629	0.219966
	MMRF_1927	17559498007	112.143	0.987209	0.971488	0.942429	0.898229	0.840299	0.479097
	MMRF_1928	23559257459	157.262	0.988989	0.979534	0.964013	0.940475	0.908276	0.658973
	MMRF_1929	27822393758	204.247	0.989093	0.982347	0.971679	0.956019	0.935057	0.762346
	MMRF_1930	21872462905	153.801	0.989285	0.977959	0.957652	0.927425	0.888088	0.625766
	MMRF_1931	12934812208	101.874	0.981748	0.952118	0.899579	0.827673	0.744742	0.383654
	MMRF_1932	15228856415	107.041	0.984045	0.958651	0.913469	0.851196	0.77756	0.417302
	MMRF_1939	24317272747	172.869	0.990223	0.981605	0.966725	0.944051	0.913229	0.677351
	MMRF_1940	7606429073	59.0845	0.962788	0.876549	0.74402	0.600947	0.474331	0.141152
	MMRF_1945	20494427921	128.69	0.987693	0.977261	0.958378	0.927943	0.88486	0.565002
	MMRF_1953	15610622413	94.3825	0.985128	0.965717	0.929446	0.872956	0.798102	0.373951
	MMRF_1955	16172664982	100.965	0.985831	0.968341	0.934552	0.881835	0.812905	0.413393
	MMRF_1957	17508641954	110.445	0.987257	0.970685	0.939764	0.89246	0.8303	0.457004
	MMRF_1963	16334773195	103.857	0.985395	0.963723	0.92286	0.863719	0.792596	0.426811
	MMRF_1965	20072570203	139.548	0.98569	0.971847	0.947867	0.912376	0.866887	0.572062
	MMRF_1967	20897922855	140.623	0.988021	0.97537	0.953515	0.92129	0.878719	0.589664
	MMRF_1970	19119839570	128.797	0.987577	0.972729	0.946038	0.906117	0.854226	0.530689
	MMRF_1971	13089132573	102.956	0.981862	0.954018	0.90406	0.834126	0.751668	0.384818
	MMRF_1972	17930240245	122.947	0.986105	0.96848	0.937092	0.89109	0.833109	0.498437
	MMRF_1974	18618755015	115.664	0.987212	0.972855	0.946988	0.907339	0.854057	0.501564
	MMRF_1977	20812552995	144.501	0.987949	0.975395	0.953548	0.920812	0.877496	0.588083
	MMRF_1978	17773737381	134.901	0.986907	0.973955	0.950297	0.91355	0.86425	0.548882
	MMRF_1981	16215326279	114.055	0.98227	0.956483	0.911151	0.848914	0.776279	0.431933
	MMRF_1982	16000991765	127.065	0.98499	0.96642	0.932369	0.883046	0.821643	0.495672
	MMRF_1985	15954818183	111.223	0.984018	0.96401	0.927974	0.874274	0.806655	0.439623
	MMRF_1986	14142832992	109.709	0.984354	0.959278	0.914739	0.852311	0.777817	0.423107
	MMRF_1991	17146449532	133.242	0.986765	0.968954	0.938004	0.89414	0.840144	0.532194
	MMRF_1992	18721831727	131.28	0.986291	0.973567	0.951725	0.91745	0.870175	0.545289
	MMRF_1994	15716829320	112.22	0.983861	0.962439	0.924372	0.869388	0.801071	0.437191
	MMRF_1995	14695850836	114.782	0.984762	0.96112	0.91941	0.860558	0.789517	0.444193
	MMRF_1997	21895988765	166.053	0.989405	0.97918	0.96169	0.935458	0.900477	0.652627
	MMRF_1998	18899398413	127.525	0.987415	0.973646	0.94929	0.912582	0.863884	0.539845
	MMRF_1999	14970067077	116.772	0.984607	0.964652	0.927714	0.873043	0.804822	0.457465
	MMRF_2000	19060832238	129.139	0.98762	0.974539	0.951537	0.91688	0.870502	0.549672
	MMRF_2001	15695505453	118.398	0.985409	0.963106	0.923614	0.868804	0.802781	0.467902
	MMRF_2002	18560565100	127.192	0.986074	0.968567	0.93796	0.893986	0.839649	0.524807
	MMRF_2005	19733435169	137.244	0.986917	0.975375	0.955833	0.925765	0.884637	0.58402
	MMRF_2006	20734893847	154.985	0.988628	0.977055	0.956767	0.926774	0.887516	0.623922
	MMRF_2007	13862684666	98.9915	0.983956	0.960043	0.916104	0.851458	0.771312	0.37225
	MMRF_2012	17810275305	137.26	0.986138	0.971144	0.944456	0.905136	0.854626	0.548532
	MMRF_2013	14803121425	107.915	0.985665	0.962874	0.922394	0.865292	0.795046	0.42924
	MMRF_2014	15070772196	116.841	0.984061	0.961577	0.921774	0.866118	0.798827	0.456807
	MMRF_2015	18862587471	143.978	0.98788	0.97416	0.949819	0.914497	0.869701	0.587134
	MMRF_2016	22190729708	175.948	0.98929	0.979654	0.963398	0.939076	0.907159	0.679616
	MMRF_2017	14407215597	108.545	0.985867	0.965354	0.927409	0.871623	0.80181	0.433731
	MMRF_2018	18851818210	127.914	0.986941	0.97156	0.943721	0.902114	0.848425	0.524119
	MMRF_2019	15574101289	121.112	0.983889	0.965328	0.93313	0.886155	0.826893	0.490544
	MMRF_2021	17046072750	124.039	0.9879	0.972997	0.945887	0.904771	0.850589	0.516211
	MMRF_2024	18390977320	146.332	0.988764	0.979012	0.960735	0.93175	0.891611	0.605961
	MMRF_2026	10833710925	87.5124	0.977064	0.935378	0.864903	0.773381	0.67403	0.301995
	MMRF_2035	15847337186	124.331	0.98537	0.963536	0.925384	0.872979	0.8104	0.486774
	MMRF_2038	17683802297	120.592	0.985046	0.970444	0.944075	0.902779	0.847396	0.502254
	MMRF_2039	14646967444	107.415	0.984342	0.957144	0.908773	0.843805	0.768651	0.417061
	MMRF_2041	15028159601	118.159	0.983447	0.961398	0.923304	0.870203	0.805353	0.466063
	MMRF_2043	18453270619	142.51	0.987065	0.970884	0.942785	0.902507	0.851903	0.556639
	MMRF_2047	17768991781	138.291	0.987001	0.971336	0.943405	0.902264	0.849595	0.542764
	MMRF_2050	14001509259	102.411	0.98312	0.957597	0.910466	0.842929	0.763116	0.393159
	MMRF_2054	17274560837	133.932	0.986789	0.970295	0.941028	0.898338	0.844684	0.534607
	MMRF_2055	15939960165	125.031	0.982881	0.959499	0.919618	0.866705	0.805154	0.490299
	MMRF_2056	22667792612	162.208	0.988727	0.980652	0.966809	0.945601	0.916216	0.680354
	MMRF_2057	16179516208	113.93	0.98476	0.967195	0.935559	0.887042	0.823508	0.458636
	MMRF_2058	12526848570	98.6967	0.980099	0.942699	0.881547	0.803804	0.718622	0.365259
	MMRF_2059	15912731580	123.126	0.98632	0.967818	0.934345	0.886371	0.826464	0.491648
	MMRF_2061	15346729419	104.845	0.983641	0.962983	0.924748	0.867354	0.794905	0.414415
	MMRF_2062	19738775310	150.722	0.98639	0.972331	0.947594	0.912074	0.86796	0.600744
	MMRF_2063	15019550283	115.318	0.98382	0.958087	0.913847	0.853577	0.782399	0.441588
	MMRF_2068	17877518518	143.944	0.986937	0.972969	0.947743	0.910331	0.862317	0.572349
	MMRF_2072	16343846317	121.698	0.984592	0.96291	0.925046	0.872768	0.809951	0.483749
	MMRF_2074	18095472806	138.217	0.985529	0.967271	0.935875	0.89213	0.838833	0.540642
	MMRF_2076	9528931230	74.7726	0.970243	0.907267	0.808263	0.694057	0.583503	0.23161
	MMRF_2079	36288197094	272.911	0.991549	0.986937	0.980033	0.970143	0.956838	0.841548
	MMRF_2080	15798557233	123.445	0.98451	0.965452	0.930741	0.879342	0.814985	0.480632
	MMRF_2081	19882799005	138.323	0.985749	0.971278	0.945262	0.907259	0.859436	0.570224
	MMRF_2082	20082313502	156.575	0.985906	0.970982	0.945244	0.908348	0.861874	0.586118
	MMRF_2083	15836187152	109.134	0.985424	0.968095	0.935736	0.886591	0.823021	0.453071
	MMRF_2085	18270380282	139.947	0.987179	0.974939	0.953321	0.920277	0.875641	0.577471
	MMRF_2087	13832650609	108.314	0.982406	0.953012	0.902903	0.835906	0.759519	0.41145
	MMRF_2089	15441448394	112.251	0.984664	0.962474	0.922057	0.865124	0.796041	0.443897
	MMRF_2090	19355897645	146.094	0.987172	0.972019	0.946094	0.908701	0.861625	0.574293
	MMRF_2091	19365623587	153.114	0.986706	0.97344	0.950328	0.916442	0.873392	0.60029
	MMRF_2093	17263909895	132.134	0.986489	0.972601	0.947942	0.910724	0.861289	0.54472
	MMRF_2095	13041305548	102.464	0.982066	0.955763	0.908531	0.841421	0.761154	0.389136
	MMRF_2098	20464096521	155.852	0.988593	0.975391	0.951683	0.917145	0.873329	0.600372
	MMRF_2101	18820126460	144.767	0.986323	0.972756	0.948719	0.912263	0.864402	0.569962
	MMRF_2102	19083974420	135.162	0.988518	0.976265	0.954582	0.921655	0.877226	0.571576
	MMRF_2106	21578226333	164.884	0.987209	0.976417	0.958137	0.931243	0.895716	0.647835
	MMRF_2107	17094441409	133.215	0.983226	0.958922	0.9182	0.864533	0.802837	0.501544
	MMRF_2112	18919858190	145.973	0.987033	0.972971	0.94903	0.914452	0.870198	0.588448
	MMRF_2113	13957920121	91.8054	0.982639	0.95461	0.903207	0.831417	0.746551	0.352062
	MMRF_2114	13439305091	103.911	0.980648	0.954333	0.908612	0.844989	0.768591	0.396866
	MMRF_2115	43021232701	302.755	0.99158	0.987559	0.981799	0.973686	0.96276	0.868601
	MMRF_2116	22324291797	173.956	0.988744	0.978372	0.96087	0.935247	0.90157	0.664594
	MMRF_2118	39266840845	290.945	0.991043	0.986616	0.980566	0.972245	0.961256	0.866993
	MMRF_2119	10958080535	85.4883	0.97627	0.932714	0.859482	0.766244	0.666467	0.294181
	MMRF_2124	26655629377	196.188	0.98875	0.981156	0.969157	0.951585	0.927969	0.739911
	MMRF_2125	10384688957	83.421	0.977675	0.934579	0.860279	0.763887	0.660412	0.281045
	MMRF_2126	16231795922	126.434	0.985763	0.965834	0.930833	0.881113	0.820223	0.496414
	MMRF_2128	21210047453	165.679	0.987569	0.97684	0.958335	0.93013	0.892217	0.632456
	MMRF_2129	13125358689	105.632	0.982908	0.957175	0.909302	0.840723	0.759447	0.398434
	MMRF_2132	16224276539	117.73	0.985835	0.964879	0.926907	0.873953	0.810077	0.475304
	MMRF_2137	9214254510	75.6008	0.97378	0.91864	0.827043	0.714953	0.602385	0.235776
	MMRF_2138	13849242274	108.261	0.983051	0.9574	0.912439	0.84962	0.774493	0.418365
	MMRF_2140	9293020002	71.8801	0.974159	0.920342	0.825737	0.707771	0.589244	0.214135
	MMRF_2141	12768944351	101.799	0.982415	0.954074	0.903361	0.832772	0.750012	0.38101
	MMRF_2143	16756215551	121.639	0.987613	0.971267	0.940796	0.894968	0.835697	0.497816
	MMRF_2144	14896845494	114.022	0.98439	0.961911	0.922856	0.868352	0.801686	0.455538
	MMRF_2147	13844999370	100.564	0.985211	0.962422	0.919899	0.857329	0.779831	0.391074
	MMRF_2150	10380327739	83.5651	0.973146	0.924583	0.845958	0.748881	0.646764	0.277635
	MMRF_2151	37049296907	261.98	0.990718	0.985564	0.977888	0.966869	0.952237	0.833163
	MMRF_2152	25820123071	193.004	0.988163	0.978672	0.962872	0.939987	0.910691	0.712571
	MMRF_2153	13242950873	100.212	0.984795	0.961173	0.917663	0.854497	0.776166	0.389326
	MMRF_2159	32847857747	231.674	0.990236	0.98549	0.978887	0.969492	0.956544	0.83154
	MMRF_2160	17737825988	128.013	0.987296	0.969826	0.938014	0.891742	0.8336	0.510688
	MMRF_2166	21341547733	149.286	0.98696	0.973996	0.950448	0.915686	0.871707	0.604079
	MMRF_2167	18713750140	132.987	0.986498	0.970046	0.940419	0.897879	0.845621	0.542152
	MMRF_2168	15824411688	102.874	0.985972	0.965607	0.927261	0.87037	0.798069	0.412648
	MMRF_2170	23754302565	159.866	0.987857	0.97726	0.958097	0.929122	0.891346	0.646276
	MMRF_2172	36187369239	247.441	0.990168	0.98568	0.979084	0.969611	0.956631	0.842931
	MMRF_2173	12046975133	89.9152	0.980423	0.94648	0.885507	0.802382	0.70826	0.326646
	MMRF_2174	14709378142	101.283	0.984094	0.961208	0.918312	0.856061	0.780118	0.401526
	MMRF_2176	11845555248	87.7668	0.980055	0.944924	0.88194	0.797955	0.70363	0.318618
	MMRF_2180	16215337743	114.714	0.985305	0.96791	0.934955	0.884853	0.820383	0.466419
	MMRF_2181	21036539659	130.09	0.986378	0.970513	0.941481	0.899	0.84653	0.54156
	MMRF_2183	23431493069	185.547	0.9886	0.980637	0.96751	0.94754	0.920123	0.707664
	MMRF_2185	18931737422	152.97	0.990066	0.980669	0.963306	0.935891	0.898251	0.625723
	MMRF_2186	22550315424	149.235	0.988597	0.979934	0.964885	0.941528	0.909046	0.649209
	MMRF_2190	27681854056	193.52	0.989439	0.983345	0.974048	0.960297	0.940984	0.763454
	MMRF_2191	15687670356	106.169	0.983591	0.958006	0.912506	0.850181	0.776814	0.421056
	MMRF_2194	15429348009	112.988	0.985696	0.964532	0.926744	0.872426	0.806136	0.454633
	MMRF_2195	16292050245	117.762	0.986059	0.965929	0.929572	0.877133	0.81262	0.471747
	MMRF_2196	17841554037	118.422	0.98684	0.973451	0.949005	0.910509	0.857979	0.509743
	MMRF_2197	16327675702	121.348	0.9865	0.967581	0.933493	0.884338	0.822833	0.487365
	MMRF_2198	14536174042	111.869	0.983357	0.954434	0.905457	0.841314	0.768858	0.433074
	MMRF_2199	17134134868	118.376	0.986719	0.971257	0.941494	0.895578	0.835375	0.489605
	MMRF_2200	12821663512	94.668	0.982441	0.949742	0.891623	0.813674	0.725681	0.352076
	MMRF_2201	11755665919	82.7428	0.982577	0.950087	0.889077	0.803302	0.703358	0.289708
	MMRF_2204	19382446145	149.979	0.98857	0.976553	0.955467	0.923663	0.881914	0.607798
	MMRF_2207	16448784474	131.581	0.986753	0.968701	0.936493	0.890859	0.834114	0.523921
	MMRF_2209	16562046851	122.635	0.984517	0.963924	0.927853	0.877277	0.816066	0.489532
	MMRF_2211	15329355042	108.847	0.985287	0.960782	0.915662	0.853731	0.781857	0.433516
	MMRF_2213	13658338610	103.807	0.981055	0.950663	0.898984	0.831053	0.753554	0.398158
	MMRF_2214	14294293563	106.851	0.983308	0.957607	0.912005	0.848797	0.773874	0.414628
	MMRF_2215	18971258645	144.372	0.986712	0.972661	0.948315	0.912507	0.866264	0.574135
	MMRF_2216	17152682740	122.419	0.986973	0.967871	0.93293	0.882619	0.820108	0.486132
	MMRF_2217	15872321377	116.935	0.985407	0.963204	0.923805	0.868787	0.802777	0.462338
	MMRF_2220	17422164347	140.848	0.985698	0.970523	0.944302	0.906272	0.858086	0.563819
	MMRF_2222	19551701388	135.499	0.986709	0.973017	0.948152	0.910805	0.861872	0.557616
	MMRF_2223	18794836813	150.581	0.987732	0.975577	0.954098	0.922364	0.881361	0.610353
	MMRF_2224	17283171998	141.872	0.987774	0.97277	0.946311	0.907703	0.858871	0.56626
	MMRF_2225	18083314183	151.897	0.98671	0.973468	0.950699	0.917413	0.873954	0.600071
	MMRF_2226	15536902405	120.761	0.984796	0.961306	0.920844	0.865425	0.799421	0.470861
	MMRF_2228	16765805494	130.602	0.985824	0.967472	0.935629	0.89043	0.834426	0.521292
	MMRF_2229	17400171169	141.686	0.9875	0.972731	0.946635	0.908233	0.859397	0.564145
	MMRF_2230	16762965913	119.781	0.986579	0.972088	0.945161	0.903585	0.848034	0.501407
	MMRF_2232	14947348141	104.216	0.984804	0.962034	0.919321	0.857628	0.782386	0.409678
	MMRF_2238	15368864636	107.39	0.984473	0.959526	0.914795	0.852759	0.778739	0.421719
	MMRF_2239	14878981037	119.456	0.985791	0.968026	0.933527	0.881327	0.815581	0.486613
	MMRF_2240	17888554938	118.465	0.987395	0.972123	0.943785	0.900621	0.843539	0.49417
	MMRF_2245	17060083320	140.327	0.986192	0.970574	0.942938	0.902738	0.851648	0.554969
	MMRF_2246	18382879180	126.1	0.986644	0.970388	0.940152	0.895394	0.838571	0.511982
	MMRF_2250	16447862438	121.832	0.984654	0.965662	0.932271	0.884757	0.825996	0.496635
	MMRF_2251	19087880998	144.178	0.987137	0.975734	0.955828	0.92517	0.883571	0.594957
	MMRF_2253	22825043071	138.462	0.987991	0.976713	0.956322	0.924955	0.883088	0.588436
	MMRF_2257	16336434460	132.423	0.987455	0.97187	0.943717	0.902106	0.848963	0.53573
	MMRF_2258	17996971887	125.385	0.986398	0.968591	0.935673	0.887175	0.826686	0.499695
	MMRF_2266	15946854940	110.724	0.984303	0.957925	0.911865	0.850789	0.780259	0.436243
	MMRF_2267	16835137871	112.454	0.986083	0.970147	0.939724	0.892085	0.828873	0.46269
	MMRF_2268	16464032375	134.365	0.987581	0.971891	0.943873	0.902909	0.850861	0.543244
	MMRF_2269	17316285205	134.71	0.985052	0.968585	0.939939	0.899194	0.848873	0.549
	MMRF_2270	16023736750	127.96	0.984145	0.963149	0.927121	0.87805	0.819943	0.509878
	MMRF_2271	18339118512	115.021	0.986208	0.969168	0.936993	0.889081	0.828404	0.478175
	MMRF_2272	26336081425	159.831	0.989773	0.980954	0.965471	0.941371	0.908686	0.661414
	MMRF_2273	14144747627	118.03	0.98408	0.961275	0.919872	0.861346	0.791677	0.461896
	MMRF_2279	12536136874	97.5283	0.979959	0.943251	0.881432	0.802188	0.71489	0.357495
	MMRF_2281	22559764912	120.872	0.987856	0.973673	0.946316	0.904904	0.850922	0.516654
	MMRF_2284	13741186374	86.9797	0.981562	0.94696	0.883582	0.797469	0.700086	0.309046
	MMRF_2286	15990571021	123.551	0.987087	0.972679	0.94481	0.902136	0.846142	0.512259
	MMRF_2288	18752730960	145.414	0.985656	0.972079	0.94925	0.91549	0.871408	0.584452
	MMRF_2289	14504885989	87.9324	0.983356	0.952345	0.894716	0.814967	0.722619	0.322208
	MMRF_2290	15732217571	101.723	0.983234	0.956123	0.907112	0.839931	0.761134	0.395526
	MMRF_2291	18123495809	121.085	0.987791	0.970996	0.939412	0.891999	0.831893	0.492007
	MMRF_2293	18635524159	155.231	0.987531	0.972493	0.946705	0.910317	0.865056	0.598763
	MMRF_2297	18568258099	144.25	0.986764	0.97253	0.948762	0.914272	0.869771	0.582017
	MMRF_2300	17088469846	142.544	0.987549	0.97259	0.946222	0.908142	0.859773	0.568536
	MMRF_2301	16328757492	132.246	0.986088	0.965793	0.930528	0.882215	0.824756	0.521205
	MMRF_2302	16981268732	133.024	0.984819	0.965347	0.932144	0.88618	0.83033	0.522798
	MMRF_2305	25537689668	205.518	0.990481	0.983757	0.973181	0.957538	0.936514	0.763289
	MMRF_2306	12861293601	101.193	0.982257	0.953463	0.90264	0.832303	0.750341	0.383075
	MMRF_2307	19494450324	161.288	0.98869	0.976779	0.95637	0.926366	0.887627	0.633264
	MMRF_2308	18867455321	147.959	0.987986	0.977395	0.957987	0.92806	0.888199	0.611412
	MMRF_2310	20186649541	129.043	0.988455	0.97444	0.948389	0.909598	0.860138	0.550262
	MMRF_2313	17014042762	140.341	0.984717	0.965255	0.932171	0.886997	0.832826	0.542722
	MMRF_2314	17775053486	143.982	0.986739	0.969898	0.940589	0.899437	0.849038	0.561792
	MMRF_2316	17080776966	110.002	0.987458	0.970879	0.939386	0.891477	0.82905	0.459615
	MMRF_2317	22083578561	180.081	0.989339	0.980503	0.965955	0.944556	0.916032	0.698887
	MMRF_2324	16361317127	127.298	0.986557	0.968374	0.936052	0.889477	0.831482	0.508566
	MMRF_2326	14053907212	110.777	0.982815	0.956083	0.910314	0.848212	0.775594	0.425649
	MMRF_2327	16548692392	134.514	0.987205	0.971172	0.942746	0.901546	0.849535	0.543825
	MMRF_2328	22578345131	184.404	0.989237	0.97878	0.960959	0.93487	0.901414	0.680827
	MMRF_2329	16933491257	113.117	0.986253	0.966195	0.929651	0.876779	0.811344	0.459915
	MMRF_2330	14822562689	117.517	0.982514	0.957351	0.914676	0.856368	0.78804	0.454295
	MMRF_2331	16927080995	130.684	0.984866	0.968662	0.940509	0.899656	0.847647	0.53307
	MMRF_2333	19063355866	149.25	0.985898	0.973608	0.953282	0.923225	0.883438	0.605758
	MMRF_2335	16886636318	138.988	0.986012	0.968559	0.93838	0.895151	0.841612	0.545949
	MMRF_2336	15162420089	123.787	0.985114	0.966099	0.931502	0.880823	0.817934	0.488196
	MMRF_2339	14983026882	123.546	0.984918	0.965624	0.93126	0.881988	0.820853	0.492939
	MMRF_2341	18194704948	143.257	0.98689	0.972128	0.946978	0.910456	0.86444	0.575897
	MMRF_2344	16689461921	130.823	0.987276	0.972663	0.944779	0.903202	0.849921	0.538073
	MMRF_2352	15045339033	118.864	0.98366	0.959222	0.917698	0.861657	0.796582	0.469423
	MMRF_2353	19395787325	152.42	0.987001	0.973964	0.952031	0.920068	0.878484	0.605384
	MMRF_2362	16274216176	128.222	0.984841	0.965896	0.933767	0.888255	0.831744	0.511577
	MMRF_2363	15479793768	124.068	0.982981	0.963022	0.929387	0.881961	0.823544	0.496653
	MMRF_2364	18046380734	146.426	0.987219	0.971128	0.943372	0.904213	0.855603	0.57232
	MMRF_2365	17153006224	141.087	0.986558	0.972048	0.946253	0.907925	0.858722	0.563181
	MMRF_2366	19529676916	153.179	0.985864	0.972068	0.948598	0.914278	0.870189	0.594214
	MMRF_2368	17953208021	146.502	0.987152	0.973332	0.948429	0.911246	0.863404	0.579518
	MMRF_2373	17562608844	136.341	0.986453	0.968745	0.937905	0.894509	0.841612	0.541518
	MMRF_2378	18395827877	144.53	0.983856	0.966778	0.937935	0.897594	0.848288	0.564052
	MMRF_2379	16819157732	138.352	0.986434	0.967699	0.935211	0.889937	0.835236	0.539871
	MMRF_2380	16928449834	140.284	0.986936	0.969648	0.939563	0.897608	0.846209	0.555234
	MMRF_2384	17140842475	136.137	0.985771	0.971101	0.945267	0.906748	0.857254	0.553003
	MMRF_2386	12552728046	104.027	0.981696	0.951544	0.899472	0.829238	0.748608	0.395674
	MMRF_2388	18489752528	145.54	0.986559	0.973179	0.949674	0.915078	0.870313	0.583873
	MMRF_2397	18361918420	143.202	0.988062	0.974481	0.950525	0.915319	0.869334	0.577003
	MMRF_2400	15924253838	131.772	0.984558	0.963116	0.92636	0.876089	0.816227	0.509235
	MMRF_2401	21111145461	165.232	0.990091	0.981299	0.965438	0.940665	0.907318	0.666079
	MMRF_2402	17357429737	135.904	0.988147	0.973493	0.946128	0.905	0.852111	0.547947
	MMRF_2404	20477202312	159.026	0.987022	0.971607	0.945864	0.910535	0.867547	0.613751
	MMRF_2407	19384582066	150.919	0.986218	0.970107	0.942855	0.904645	0.857923	0.585859
	MMRF_2409	19722453323	160.121	0.987362	0.972768	0.947708	0.912635	0.869402	0.620473
	MMRF_2410	15246562094	117.536	0.982008	0.956257	0.913295	0.855305	0.787325	0.452715
	MMRF_2413	19835317627	157.848	0.987838	0.97464	0.952503	0.92065	0.880006	0.619176
	MMRF_2419	16912469370	135.822	0.986169	0.96763	0.935177	0.889536	0.833658	0.53371
	MMRF_2422	17385149962	143.887	0.985908	0.968318	0.938673	0.897489	0.847253	0.56069
	MMRF_2425	15855490182	128.542	0.9847	0.964126	0.92877	0.879554	0.820421	0.506951
	MMRF_2426	19027111147	153.81	0.985531	0.969865	0.942847	0.904727	0.857677	0.58472
	MMRF_2427	17020484082	134.101	0.989322	0.97751	0.95464	0.918015	0.868211	0.553551
	MMRF_2428	19165668672	156.138	0.986447	0.971281	0.945684	0.90994	0.865103	0.601026
	MMRF_2429	15625904503	127.398	0.98488	0.961788	0.922493	0.870288	0.809235	0.497416
	MMRF_2433	18494687927	149.3	0.987807	0.975595	0.954508	0.92322	0.882106	0.604647
	MMRF_2436	15062055015	120.689	0.986418	0.970433	0.939238	0.89205	0.832607	0.495992
	MMRF_2438	17331863790	137.912	0.987566	0.974486	0.949606	0.911755	0.862757	0.563204
	MMRF_2440	15890185017	126.119	0.982813	0.959645	0.920609	0.867606	0.804802	0.488642
	MMRF_2442	24332834505	195.684	0.990795	0.984446	0.973838	0.957675	0.935198	0.744255
	MMRF_2444	15506541581	125.364	0.985129	0.96595	0.931621	0.88246	0.822113	0.501463
	MMRF_2446	17687838409	140.863	0.988204	0.977191	0.955697	0.920786	0.87275	0.574309
	MMRF_2449	18610535722	151.676	0.988035	0.978027	0.960407	0.93303	0.895751	0.627437
	MMRF_2452	16756275527	130.149	0.987394	0.971723	0.943683	0.902268	0.849111	0.530658
	MMRF_2455	12905901644	105.346	0.979525	0.943558	0.884977	0.810731	0.729644	0.389723
	MMRF_2456	17962380587	147.955	0.989205	0.979155	0.961291	0.933409	0.895124	0.617604
	MMRF_2457	20105471862	163.227	0.989119	0.981826	0.969273	0.949311	0.920476	0.675546
	MMRF_2461	19885441687	157.713	0.989341	0.981789	0.968163	0.945769	0.913384	0.653944
	MMRF_2464	17734315401	143.932	0.987087	0.974446	0.950933	0.915031	0.868211	0.579157
	MMRF_2465	16377645043	129.688	0.98817	0.977476	0.956993	0.922633	0.873375	0.545862
	MMRF_2468	15030270714	120.519	0.987731	0.971887	0.941271	0.894612	0.834205	0.496476
	MMRF_2469	19501571687	157.608	0.988396	0.977198	0.958152	0.929964	0.892968	0.632932
	MMRF_2471	18824773941	153.337	0.989325	0.97862	0.95859	0.927514	0.885827	0.609985
	MMRF_2472	17141388811	134.338	0.98656	0.971373	0.94463	0.905464	0.855315	0.551073
	MMRF_2473	16229796016	134.515	0.987596	0.975333	0.952295	0.915646	0.866011	0.553046
	MMRF_2475	18742638161	146.869	0.989686	0.979904	0.961469	0.9322	0.892196	0.610156
	MMRF_2476	21964876917	177.216	0.990692	0.983907	0.972063	0.95351	0.927436	0.712611
	MMRF_2477	17684145717	144.461	0.985425	0.970537	0.944801	0.908086	0.861755	0.575544
	MMRF_2478	20140014173	161.186	0.990071	0.982288	0.968987	0.947983	0.918172	0.671112
	MMRF_2480	23885089669	191.74	0.991142	0.985685	0.976595	0.96242	0.942268	0.758097
	MMRF_2485	19728091454	155.79	0.988544	0.979954	0.965011	0.941531	0.908682	0.648596
	MMRF_2486	18512808424	149.401	0.987873	0.977177	0.9583	0.928198	0.88676	0.60709
	MMRF_2487	17831151513	145.322	0.988244	0.976507	0.955856	0.924017	0.881387	0.595008
	MMRF_2488	18100888611	144.465	0.989391	0.978858	0.959522	0.929211	0.88801	0.600231
	MMRF_2489	22455133120	182.991	0.990191	0.98265	0.96962	0.949502	0.922041	0.707328
	MMRF_2490	17992891128	143.313	0.988691	0.97947	0.962361	0.934514	0.895257	0.602571
	MMRF_2493	21296188487	168.321	0.990568	0.983763	0.972147	0.953772	0.927269	0.697892
	MMRF_2497	16228282888	129.726	0.986651	0.972546	0.946407	0.906693	0.855493	0.53834
	MMRF_2498	19285310962	159.62	0.989175	0.979411	0.962676	0.936935	0.901905	0.645037
	MMRF_2499	16413814444	130.41	0.988464	0.978607	0.959424	0.9269	0.879782	0.554084
	MMRF_2501	15864666133	127.007	0.986371	0.969597	0.937726	0.891939	0.835163	0.516366
	MMRF_2503	20686728421	165.215	0.988966	0.978745	0.960804	0.933865	0.898698	0.654286
	MMRF_2504	17667017002	143.934	0.988683	0.977458	0.957333	0.92657	0.885479	0.601377
	MMRF_2505	21593277898	174.571	0.988714	0.980471	0.966811	0.946125	0.918039	0.699735
	MMRF_2506	20433262629	161.588	0.989626	0.979819	0.961247	0.932439	0.894211	0.635138
	MMRF_2511	25292091352	198.369	0.991581	0.986511	0.977774	0.964139	0.944631	0.765824
	MMRF_2514	19123434792	150.243	0.988726	0.978828	0.959994	0.930066	0.889601	0.614344
	MMRF_2515	15763565564	127.096	0.987452	0.974448	0.949156	0.908646	0.854202	0.526324
	MMRF_2516	15030728248	119.871	0.987467	0.969172	0.934458	0.883822	0.821055	0.48736
	MMRF_2517	20363901011	160.368	0.989721	0.980186	0.962908	0.935988	0.899269	0.639065
	MMRF_2518	16257298685	132.988	0.986285	0.970918	0.942635	0.900042	0.844978	0.52972
	MMRF_2519	17288557441	139.696	0.988993	0.976738	0.95358	0.917587	0.869621	0.567348
	MMRF_2523	19988092949	159.435	0.988177	0.979285	0.964054	0.940029	0.905939	0.646965
	MMRF_2525	16460382538	130.721	0.986505	0.970684	0.941102	0.897665	0.842824	0.531026
	MMRF_2526	18079705983	151.304	0.98628	0.972082	0.947114	0.910924	0.865171	0.591343
	MMRF_2531	15310075567	124.456	0.987582	0.972858	0.94494	0.902019	0.846516	0.517969
	MMRF_2532	17795199386	142.753	0.988806	0.976167	0.952314	0.916588	0.871015	0.583746
	MMRF_2535	18200383452	141.194	0.986057	0.973329	0.951823	0.919003	0.874496	0.574644
	MMRF_2538	21333301085	170.53	0.990248	0.981881	0.966809	0.943364	0.911643	0.677028
	MMRF_2539	15589691551	123.901	0.987283	0.973703	0.946692	0.90388	0.846188	0.510751
	MMRF_2541	18211595770	144.337	0.987779	0.975664	0.95286	0.917357	0.869872	0.576428
	MMRF_2543	16689587367	135.868	0.988781	0.97661	0.953974	0.918669	0.871158	0.560606
	MMRF_2545	15391884213	122.255	0.988925	0.976501	0.952256	0.913085	0.859659	0.515666
	MMRF_2546	19820888800	156.511	0.988994	0.979283	0.961702	0.934126	0.896737	0.630577
	MMRF_2548	13270660312	105.697	0.983482	0.958476	0.911741	0.846812	0.771696	0.414695
	MMRF_2549	14754563726	117.423	0.986827	0.970482	0.937763	0.886908	0.821565	0.477054
	MMRF_2550	19357083976	152.942	0.988382	0.979005	0.962165	0.935501	0.898915	0.631142
	MMRF_2554	16182846310	128.984	0.987351	0.972278	0.94297	0.899	0.842747	0.526216
	MMRF_2557	18065126778	140.613	0.989261	0.977622	0.954974	0.919643	0.872422	0.573971
	MMRF_2559	18797902280	148.367	0.989595	0.980286	0.963181	0.936272	0.899555	0.627701
	MMRF_2560	16535965300	133.744	0.988441	0.974263	0.94666	0.903751	0.847957	0.534258
	MMRF_2562	15017101713	117.793	0.986445	0.967962	0.931467	0.877819	0.812731	0.477007
	MMRF_2563	15254327240	120.636	0.987291	0.973827	0.947607	0.906659	0.85212	0.510745
	MMRF_2564	14449429445	115.274	0.986728	0.969945	0.936872	0.887361	0.825522	0.479386
	MMRF_2566	13999722891	112.011	0.986852	0.96721	0.928943	0.872146	0.801382	0.447899
	MMRF_2567	17586114657	143.518	0.988471	0.974363	0.948318	0.910147	0.861586	0.573156
	MMRF_2568	19571843964	151.604	0.990112	0.981426	0.964865	0.938433	0.901937	0.630785
	MMRF_2570	19008062221	150.56	0.988136	0.976859	0.955568	0.922427	0.878293	0.59721
	MMRF_2572	18095940617	147.617	0.9877	0.973017	0.947198	0.909629	0.862228	0.579669
	MMRF_2573	17225386713	135.953	0.986842	0.969794	0.938964	0.896095	0.844187	0.546959
	MMRF_2574	19281705700	151.136	0.989567	0.97779	0.955322	0.921515	0.877971	0.60216
	MMRF_2577	14063186016	113.247	0.986283	0.968358	0.933154	0.879416	0.811222	0.460782
	MMRF_2579	18090367965	143.779	0.989461	0.979788	0.961888	0.933455	0.894161	0.607143
	MMRF_2580	15747978609	130.183	0.986599	0.97171	0.944064	0.901786	0.84676	0.524466
	MMRF_2581	21126567603	166.359	0.989242	0.979571	0.962404	0.936198	0.901236	0.655524
	MMRF_2583	17690206053	143.183	0.986508	0.969082	0.937877	0.89435	0.841738	0.55482
	MMRF_2584	17464622244	140.462	0.987646	0.975936	0.954418	0.920782	0.875619	0.574748
	MMRF_2587	19712586709	153.601	0.988465	0.978494	0.960046	0.93062	0.890067	0.611059
	MMRF_2590	16690077561	132.514	0.98732	0.974189	0.949022	0.909481	0.856531	0.539328
	MMRF_2592	15771665208	124.322	0.987768	0.974562	0.947762	0.904205	0.845433	0.510261
	MMRF_2593	19918105374	156.298	0.989868	0.979652	0.960325	0.930209	0.88974	0.616515
	MMRF_2595	21687964560	171.847	0.988537	0.978672	0.961006	0.934638	0.900103	0.663548
	MMRF_2596	23528458512	183.833	0.989319	0.981395	0.966747	0.944181	0.913914	0.696935
	MMRF_2598	20765652835	164.838	0.98791	0.977486	0.958627	0.93018	0.892719	0.640709
	MMRF_2601	15575817872	130.833	0.98578	0.969362	0.939513	0.894753	0.837291	0.518129
	MMRF_2602	16654457822	136.526	0.988325	0.974753	0.949683	0.911296	0.861502	0.556795
	MMRF_2605	24539048154	190.121	0.989974	0.983898	0.973067	0.955931	0.931927	0.736851
	MMRF_2606	17569301677	140.92	0.988173	0.977223	0.956679	0.923389	0.877288	0.572396
	MMRF_2609	19635068828	155.153	0.989405	0.978926	0.960151	0.931657	0.893386	0.625565
	MMRF_2611	20219855239	159.65	0.988353	0.978834	0.96129	0.933024	0.893799	0.626864
	MMRF_2613	16235881709	133.01	0.986379	0.971472	0.944325	0.902852	0.849169	0.533486
	MMRF_2614	15848501037	128.122	0.987736	0.970557	0.938283	0.890816	0.831219	0.513402
	MMRF_2621	15856944357	127.444	0.985892	0.96952	0.939364	0.89503	0.839631	0.51855
	MMRF_2622	16705743801	134.035	0.988428	0.976053	0.95331	0.917741	0.86957	0.55489
	MMRF_2624	15297872569	122.797	0.987047	0.969334	0.936543	0.887866	0.826462	0.492253
	MMRF_2628	19989078633	162.977	0.988612	0.976017	0.953604	0.921177	0.880116	0.624092
	MMRF_2630	16177965805	132.67	0.987646	0.971386	0.941857	0.898446	0.843589	0.529582
	MMRF_2631	16277400826	133.55	0.987205	0.971778	0.944225	0.903143	0.850769	0.539451
	MMRF_2634	17281630928	140.991	0.987304	0.973019	0.947039	0.90852	0.859791	0.566726
	MMRF_2635	19340792836	155.788	0.988082	0.976937	0.957914	0.929564	0.89155	0.626304
	MMRF_2636	17890743489	141.962	0.985162	0.969482	0.942454	0.903402	0.854913	0.565763
	MMRF_2638	17609623316	135.677	0.987602	0.972748	0.945915	0.905892	0.854518	0.549505
	MMRF_2639	20569877998	158.692	0.989537	0.978965	0.960385	0.932334	0.895115	0.636188
	MMRF_2640	22077551410	173.71	0.987877	0.976546	0.956419	0.927406	0.890661	0.658753
	MMRF_2641	17535770879	141.105	0.987659	0.971891	0.943451	0.902415	0.851253	0.558543
	MMRF_2642	24482274331	190.839	0.989484	0.982297	0.969822	0.950626	0.924332	0.721589
	MMRF_2643	22278458669	178.707	0.989296	0.979442	0.962849	0.938958	0.908094	0.688162
	MMRF_2644	20783474416	165.104	0.989781	0.980544	0.963987	0.938664	0.904363	0.657582
	MMRF_2647	19143156927	151.826	0.989066	0.977741	0.957152	0.926123	0.885815	0.618879
				WES NORMAL
	Samples	picardTools.alignmentStats.PF_HQ_ALIGNED_BASES.PAIR	picardTools.hsStats.MEAN_TARGET_COVERAGE	picardTools.hsStats.PCT_TARGET_BASES_10X	picardTools.hsStats.PCT_TARGET_BASES_20X	picardTools.hsStats.PCT_TARGET_BASES_30X	picardTools.hsStats.PCT_TARGET_BASES_40X	picardTools.hsStats.PCT_TARGET_BASES_50X	picardTools.hsStats.PCT_TARGET_BASES_100X
	MMRF_1016	14092899647	104.278	0.985705	0.964961	0.925771	0.867239	0.792822	0.400785
	MMRF_1020	15308149837	104.686	0.985101	0.966973	0.933761	0.883274	0.817005	0.429029
	MMRF_1021	14440322522	88.1291	0.981064	0.952237	0.897424	0.817108	0.720467	0.301692
	MMRF_1029	14915842976	102.05	0.985697	0.964656	0.92462	0.864987	0.790042	0.393814
	MMRF_1030	15593575801	99.4312	0.985553	0.965621	0.926062	0.86435	0.785506	0.376104
	MMRF_1031	14781231597	94.2671	0.958541	0.934669	0.90081	0.852251	0.788662	0.355142
	MMRF_1032	15821205648	112.37	0.94576	0.918501	0.889646	0.853687	0.807961	0.49246
	MMRF_1037	14458677369	96.6105	0.956481	0.933584	0.902813	0.85933	0.802824	0.377676
	MMRF_1038	18650894419	115.235	0.9615	0.943464	0.921001	0.890456	0.850195	0.527826
	MMRF_1045	12014262233	88.8962	0.981557	0.953431	0.900499	0.823231	0.729831	0.313998
	MMRF_1048	10224513711	78.2148	0.978117	0.939291	0.866805	0.767598	0.656385	0.243961
	MMRF_1049	16867596048	131.689	0.985839	0.971551	0.946345	0.907789	0.856378	0.536867
	MMRF_1054	12354553496	97.2956	0.982087	0.959401	0.916495	0.851975	0.770569	0.364806
	MMRF_1055	14128249717	112.606	0.985683	0.966224	0.931015	0.878964	0.813451	0.447848
	MMRF_1068	13563690730	89.01	0.949987	0.919007	0.880022	0.83097	0.770484	0.347665
	MMRF_1073	23983796513	174.182	0.988654	0.98103	0.969114	0.950999	0.925817	0.709981
	MMRF_1077	13714011834	66.7742	0.943138	0.894024	0.824758	0.735465	0.630632	0.158537
	MMRF_1082	16947663668	88.3318	0.953515	0.922763	0.883144	0.832157	0.769517	0.337684
	MMRF_1085	16339095267	110.822	0.986554	0.97099	0.94268	0.899223	0.841154	0.472437
	MMRF_1086	15621620717	99.3961	0.952187	0.924137	0.890623	0.849245	0.79927	0.437908
	MMRF_1089	12164869706	48.8045	0.976726	0.920884	0.804809	0.638517	0.454218	0.016456
	MMRF_1090	15289253700	97.0451	0.981465	0.959028	0.917692	0.855134	0.775392	0.364433
	MMRF_1092	18156060444	105.802	0.957853	0.931504	0.900042	0.860807	0.812834	0.470674
	MMRF_1098	13083733049	87.7112	0.982343	0.950233	0.891127	0.808706	0.712568	0.303568
	MMRF_1100	11967356361	79.1955	0.952533	0.909996	0.838315	0.741348	0.630121	0.23014
	MMRF_1107	14971147862	84.6876	0.954202	0.915738	0.853101	0.769063	0.670939	0.263427
	MMRF_1108	13318719360	83.7661	0.979892	0.948951	0.890769	0.805452	0.704175	0.277897
	MMRF_1112	16804113167	140.833	0.989019	0.977806	0.957392	0.925869	0.88317	0.592306
	MMRF_1127	15270134122	108.131	0.986041	0.969307	0.937517	0.888083	0.822969	0.443239
	MMRF_1129	16375973025	89.5845	0.954028	0.918408	0.860695	0.783129	0.691611	0.291545
	MMRF_1131	16384132298	113.697	0.985903	0.971881	0.946546	0.906258	0.850932	0.486351
	MMRF_1137	21277917678	165.122	0.989769	0.980852	0.965597	0.942211	0.910252	0.665035
	MMRF_1143	19031972846	139.693	0.988677	0.976853	0.955861	0.923771	0.880905	0.582904
	MMRF_1148	14763906714	88.0078	0.984512	0.960534	0.911638	0.837345	0.744569	0.311867
	MMRF_1151	11488665277	71.6819	0.94804	0.892015	0.802769	0.691062	0.572284	0.187541
	MMRF_1152	14618449879	87.5266	0.955287	0.916982	0.854482	0.771666	0.675605	0.277363
	MMRF_1153	19418378562	156.088	0.990038	0.983599	0.97215	0.953156	0.924976	0.66997
	MMRF_1155	14406194418	98.6279	0.985088	0.964071	0.925009	0.86675	0.792537	0.396857
	MMRF_1157	16623954953	136.3	0.987213	0.974331	0.950829	0.914251	0.865264	0.556874
	MMRF_1164	13733352314	82.7026	0.980042	0.950978	0.895473	0.812723	0.712346	0.276372
	MMRF_1167	18649652616	127.375	0.987863	0.973311	0.947201	0.907544	0.855639	0.525186
	MMRF_1169	13608730280	101.453	0.984713	0.962094	0.920553	0.859662	0.783677	0.399314
	MMRF_1171	8222255019	58.7622	0.974789	0.916204	0.809493	0.6707	0.526378	0.117056
	MMRF_1178	12893150432	105.095	0.982819	0.959778	0.918863	0.859595	0.786265	0.407233
	MMRF_1179	21775478660	168.881	0.990391	0.982595	0.969057	0.948004	0.918936	0.685293
	MMRF_1180	18187311736	137.768	0.987859	0.978779	0.962542	0.937176	0.902081	0.621698
	MMRF_1184	14439037129	105.131	0.984082	0.964824	0.928902	0.873555	0.801453	0.411463
	MMRF_1185	19175850965	128.396	0.988986	0.978089	0.957802	0.926582	0.884486	0.578637
	MMRF_1188	12339923747	94.0612	0.984619	0.961012	0.916854	0.853358	0.774359	0.370227
	MMRF_1189	10078479681	61.3239	0.942015	0.878618	0.772677	0.634519	0.492787	0.128295
	MMRF_1195	11353356529	76.6849	0.950579	0.908381	0.838958	0.744248	0.633094	0.216994
	MMRF_1202	16487285481	127.924	0.984855	0.968532	0.9409	0.900608	0.848535	0.525041
	MMRF_1205	20280367859	132.074	0.988019	0.978258	0.961331	0.934592	0.896304	0.590195
	MMRF_1216	22136893519	177.87	0.986506	0.977689	0.964969	0.946519	0.921377	0.712211
	MMRF_1231	17608941608	128.501	0.952215	0.928642	0.903339	0.872845	0.833505	0.540399
	MMRF_1232	17573088136	142.127	0.987117	0.974929	0.953371	0.920508	0.8764	0.579182
	MMRF_1250	16527335580	99.6399	0.981589	0.957242	0.913904	0.850658	0.772253	0.375908
	MMRF_1251	23432519604	127.598	0.954313	0.938692	0.921073	0.89872	0.869901	0.6252
	MMRF_1257	15286171224	87.8125	0.94777	0.914172	0.865843	0.8024	0.727202	0.330109
	MMRF_1267	8774164104	59.5672	0.913325	0.855147	0.770155	0.659014	0.534555	0.127576
	MMRF_1269	16977779620	107.13	0.955845	0.929128	0.893715	0.847201	0.787598	0.409144
	MMRF_1270	15720893084	117.565	0.986452	0.973727	0.950321	0.913819	0.864061	0.516311
	MMRF_1274	12402736466	84.182	0.935654	0.902358	0.853032	0.786419	0.706513	0.294824
	MMRF_1283	14999113349	105.711	0.986118	0.9687	0.935026	0.883046	0.815163	0.43049
	MMRF_1284	18401495237	140.553	0.987332	0.974343	0.952329	0.919752	0.876676	0.58288
	MMRF_1285	19841725829	162.491	0.99132	0.984945	0.972978	0.953414	0.925288	0.68428
	MMRF_1286	13277164737	110.052	0.984945	0.964011	0.9265	0.871992	0.803532	0.434432
	MMRF_1309	17607722956	137.986	0.986792	0.975036	0.954674	0.923345	0.88057	0.577733
	MMRF_1311	13949048498	53.1342	0.933068	0.884958	0.808403	0.69953	0.561082	0.038476
	MMRF_1318	16853810129	139.667	0.986547	0.973278	0.951093	0.918305	0.875068	0.580281
	MMRF_1323	27593905779	215.92	0.990338	0.986203	0.980404	0.971903	0.959895	0.840739
	MMRF_1327	15168362625	102.795	0.951461	0.92388	0.888078	0.838591	0.772729	0.378216
	MMRF_1328	21751139143	144.221	0.990002	0.982121	0.96847	0.947246	0.917632	0.671365
	MMRF_1331	16956218097	96.5045	0.987366	0.970425	0.937205	0.886096	0.818946	0.404282
	MMRF_1332	16536306297	137.966	0.990582	0.981302	0.962577	0.932047	0.889436	0.587744
	MMRF_1338	10675338943	81.791	0.979754	0.942194	0.873052	0.778429	0.671886	0.264513
	MMRF_1339	14543692997	99.6797	0.986146	0.964194	0.92267	0.86221	0.78673	0.40009
	MMRF_1342	6661747032	46.6374	0.95671	0.840596	0.666734	0.492784	0.351926	0.06554
	MMRF_1344	14561265060	107.334	0.984518	0.965973	0.930067	0.874809	0.802868	0.415141
	MMRF_1348	9528539830	72.8126	0.979903	0.939753	0.866605	0.767185	0.653808	0.221575
	MMRF_1349	19437107074	153.664	0.98677	0.975404	0.957637	0.931458	0.896615	0.639693
	MMRF_1352	10701626332	74.7349	0.979411	0.938366	0.862407	0.758772	0.643173	0.225787
	MMRF_1354	12584769759	91.7933	0.982771	0.954156	0.900992	0.824106	0.73232	0.327098
	MMRF_1355	16557340190	133.147	0.986274	0.971999	0.947992	0.91241	0.865547	0.555179
	MMRF_1356	12532641153	94.6746	0.984929	0.962991	0.922214	0.862324	0.786587	0.37908
	MMRF_1358	21000640347	132.623	0.987634	0.975793	0.955286	0.922742	0.877705	0.556832
	MMRF_1360	18302456698	82.7922	0.985351	0.969523	0.938076	0.884636	0.807749	0.298767
	MMRF_1361	19604874996	156.98	0.987544	0.977118	0.960313	0.93529	0.901711	0.650275
	MMRF_1365	13270762313	88.766	0.984235	0.962273	0.919066	0.85322	0.768921	0.335294
	MMRF_1371	10716560934	69.2606	0.978659	0.937288	0.859808	0.753739	0.633231	0.18916
	MMRF_1377	12070203563	73.1696	0.980576	0.94587	0.879756	0.785383	0.674346	0.217567
	MMRF_1380	12817060755	100.525	0.981674	0.957937	0.914893	0.851972	0.773846	0.381076
	MMRF_1383	14416069878	91.4735	0.983923	0.960099	0.915841	0.850386	0.768751	0.34788
	MMRF_1386	2776480812	19.8117	0.791215	0.414461	0.182548	0.07736	0.03183	0.000304
	MMRF_1388	11979909119	93.0425	0.982535	0.957144	0.907597	0.834509	0.744778	0.334039
	MMRF_1389	15393029099	101.422	0.984527	0.967687	0.935931	0.885582	0.81737	0.412623
	MMRF_1393	15014043083	126.297	0.983717	0.968571	0.942843	0.903933	0.852105	0.519572
	MMRF_1395	10117616360	74.5018	0.978052	0.936854	0.862859	0.762861	0.65079	0.226877
	MMRF_1401	20914684293	169.494	0.988139	0.979167	0.964885	0.943898	0.915346	0.690354
	MMRF_1407	16108422364	115.064	0.987726	0.971949	0.943367	0.89971	0.841998	0.480879
	MMRF_1408	12495397270	91.2573	0.982352	0.956638	0.907093	0.833213	0.7425	0.32684
	MMRF_1413	19628733608	161.696	0.986983	0.976382	0.959994	0.936098	0.90388	0.661119
	MMRF_1423	14095500499	95.9287	0.98507	0.964305	0.923743	0.861562	0.78164	0.372518
	MMRF_1424	13778715034	111.124	0.982772	0.96383	0.929794	0.878734	0.813002	0.441675
	MMRF_1425	18888000114	146.368	0.987864	0.976325	0.956935	0.927864	0.888861	0.610419
	MMRF_1426	18441358704	143.309	0.985393	0.973269	0.953715	0.923834	0.883312	0.593802
	MMRF_1431	18685889192	136.466	0.989111	0.977444	0.956026	0.923037	0.878569	0.573391
	MMRF_1432	19512450952	158.035	0.986928	0.975777	0.958598	0.933409	0.899843	0.649123
	MMRF_1433	17402840556	132.935	0.985775	0.971153	0.946595	0.910195	0.862537	0.550366
	MMRF_1434	17539614536	139.222	0.985095	0.972302	0.951382	0.920206	0.878087	0.580551
	MMRF_1436	19135635717	151.092	0.987374	0.975973	0.957593	0.930037	0.893195	0.62588
	MMRF_1439	9124143801	74.6113	0.974929	0.929584	0.847571	0.739256	0.622742	0.219395
	MMRF_1445	12400058540	91.0324	0.979853	0.951172	0.898051	0.821706	0.730269	0.323782
	MMRF_1446	16668662876	128.831	0.98485	0.968567	0.941121	0.900713	0.84846	0.524804
	MMRF_1447	16846017323	132.553	0.986034	0.97123	0.946062	0.908606	0.859671	0.544499
	MMRF_1450	20927786721	168.299	0.987725	0.979353	0.966154	0.946347	0.918704	0.690929
	MMRF_1451	13083783216	108.449	0.983699	0.96201	0.923468	0.867331	0.797059	0.424363
	MMRF_1453	17541852662	116.511	0.98604	0.969582	0.940376	0.89594	0.83775	0.48048
	MMRF_1454	12973816671	107.409	0.981975	0.961046	0.923756	0.867986	0.797641	0.418039
	MMRF_1460	19027886974	157.405	0.987779	0.977296	0.960269	0.935121	0.901434	0.64969
	MMRF_1461	16889353365	139.289	0.986274	0.972581	0.95013	0.916864	0.873202	0.578084
	MMRF_1466	16089232043	128.68	0.984885	0.970409	0.945292	0.907027	0.855912	0.526936
	MMRF_1474	18615998836	154.247	0.987764	0.977181	0.959739	0.933647	0.89876	0.64066
	MMRF_1484	15404645296	105.652	0.986593	0.966755	0.928952	0.871917	0.799049	0.410334
	MMRF_1485	17364288009	110.617	0.985581	0.966548	0.932313	0.881142	0.815407	0.440737
	MMRF_1486	18364064318	126.143	0.987562	0.975288	0.953912	0.920815	0.875618	0.552067
	MMRF_1489	17488175157	143.192	0.987045	0.974666	0.953926	0.923036	0.881913	0.595313
	MMRF_1491	20151255121	126.466	0.98682	0.973503	0.949589	0.911777	0.860118	0.520633
	MMRF_1496	15258015037	102.461	0.981849	0.957275	0.911928	0.848948	0.774769	0.407679
	MMRF_1497	18374511211	120.665	0.986962	0.970796	0.941994	0.898435	0.841618	0.493594
	MMRF_1499	16679604800	127.702	0.988175	0.973263	0.945659	0.904264	0.850678	0.522508
	MMRF_1500	20271711780	159.341	0.990754	0.984153	0.972588	0.953882	0.926739	0.68416
	MMRF_1501	12498406476	86.4762	0.981352	0.950897	0.892685	0.808394	0.708755	0.291693
	MMRF_1502	12546870744	86.2423	0.979757	0.948467	0.890635	0.807425	0.708928	0.291273
	MMRF_1505	15878775378	111.148	0.986804	0.970781	0.941634	0.896892	0.83746	0.466422
	MMRF_1506	11517277171	91.5337	0.982938	0.957187	0.906968	0.831832	0.739828	0.323245
	MMRF_1511	13730470704	93.1567	0.985953	0.961709	0.914321	0.844431	0.758771	0.338253
	MMRF_1516	14046983176	108.194	0.986071	0.966796	0.930625	0.875916	0.806149	0.423715
	MMRF_1518	17714960660	130.586	0.986522	0.974342	0.952866	0.919072	0.872568	0.548906
	MMRF_1519	25448689023	170.51	0.990097	0.981941	0.968665	0.948596	0.920934	0.696101
	MMRF_1520	19585316515	143.293	0.988607	0.978449	0.960027	0.930858	0.890659	0.599085
	MMRF_1522	12395251490	96.5236	0.981093	0.957402	0.912788	0.846191	0.763031	0.358605
	MMRF_1523	19331376558	131.099	0.988464	0.975846	0.953043	0.917795	0.870828	0.553044
	MMRF_1525	16786860082	120.391	0.986853	0.974023	0.950698	0.913764	0.862749	0.51211
	MMRF_1531	25339687025	190.706	0.989655	0.982855	0.972607	0.957527	0.936811	0.753419
	MMRF_1533	17261737323	124.047	0.988324	0.975274	0.951428	0.914831	0.865592	0.532285
	MMRF_1534	12836865534	98.4903	0.982397	0.958279	0.914733	0.850736	0.771186	0.374523
	MMRF_1535	13257319323	95.2964	0.984172	0.958746	0.911644	0.843864	0.761427	0.368029
	MMRF_1538	13253923753	102.491	0.985061	0.963525	0.923118	0.862622	0.786306	0.391385
	MMRF_1539	18435220349	142.462	0.987198	0.976849	0.959105	0.931064	0.892185	0.600642
	MMRF_1540	15875694344	122.378	0.986122	0.972497	0.947701	0.908312	0.854687	0.507716
	MMRF_1541	21530060558	140.019	0.989778	0.980438	0.964095	0.938737	0.90345	0.623786
	MMRF_1542	11423532969	91.2221	0.980192	0.95102	0.898424	0.823158	0.733408	0.327418
	MMRF_1543	12137362377	96.1361	0.982053	0.954442	0.903448	0.830133	0.74231	0.357583
	MMRF_1546	18182882101	145.827	0.9897	0.979523	0.960571	0.930706	0.889629	0.602422
	MMRF_1547	19239752290	151.419	0.990106	0.981034	0.96446	0.938314	0.9019	0.62762
	MMRF_1550	14153525148	113.043	0.983969	0.964955	0.931256	0.881217	0.816905	0.453011
	MMRF_1555	14355574843	98.476	0.985434	0.965773	0.927584	0.86889	0.792576	0.388505
	MMRF_1556	14707331980	107.527	0.986173	0.967258	0.931558	0.877171	0.80718	0.422523
	MMRF_1560	18823535275	146.174	0.988015	0.977158	0.95847	0.92999	0.891327	0.609723
	MMRF_1564	13609882870	98.7154	0.985229	0.962849	0.921189	0.859708	0.782667	0.386735
	MMRF_1565	15574787055	112.205	0.986075	0.969967	0.939355	0.891202	0.827291	0.45296
	MMRF_1568	15960809313	45.8165	0.979177	0.924215	0.791276	0.59098	0.383933	0.010516
	MMRF_1569	13039830671	93.7734	0.984328	0.959108	0.912357	0.843978	0.759653	0.355219
	MMRF_1570	13614705173	109.045	0.983087	0.964924	0.931919	0.880814	0.813439	0.432547
	MMRF_1572	13662250322	107.268	0.983009	0.962154	0.924594	0.86934	0.798895	0.420323
	MMRF_1573	12266079403	99.9149	0.981133	0.958399	0.916245	0.852959	0.773413	0.376764
	MMRF_1574	10552665935	81.9018	0.978007	0.941766	0.876077	0.785184	0.681797	0.269024
	MMRF_1576	14891185949	109.594	0.985771	0.968338	0.934889	0.882928	0.814816	0.437499
	MMRF_1577	12875456271	103.75	0.982277	0.959748	0.91949	0.860125	0.785817	0.399523
	MMRF_1579	15647218920	122.79	0.985576	0.971416	0.945964	0.906231	0.85223	0.506354
	MMRF_1580	13155162442	106.215	0.982613	0.961357	0.923318	0.866899	0.795592	0.414995
	MMRF_1583	12536611043	99.7612	0.981535	0.95988	0.919538	0.858281	0.780273	0.380439
	MMRF_1586	11559619628	93.7725	0.980594	0.955302	0.907515	0.83687	0.749544	0.34185
	MMRF_1587	19651551713	154.462	0.987798	0.977457	0.960795	0.935868	0.90194	0.641042
	MMRF_1588	13455168550	89.4518	0.984189	0.958936	0.911147	0.840538	0.753053	0.32919
	MMRF_1589	21400367043	169.49	0.988557	0.979992	0.966492	0.946373	0.918722	0.691804
	MMRF_1593	22984760369	181.437	0.989196	0.981762	0.970366	0.953438	0.930102	0.729411
	MMRF_1595	14047708205	110.204	0.983221	0.963597	0.928591	0.876198	0.809244	0.437176
	MMRF_1596	25110482285	188.079	0.989437	0.982413	0.971953	0.956611	0.935374	0.748027
	MMRF_1597	17709777849	137.874	0.987969	0.97426	0.950491	0.915129	0.86867	0.565644
	MMRF_1598	18701503733	144.653	0.986636	0.97498	0.955407	0.925741	0.885531	0.596402
	MMRF_1601	17847349194	126.171	0.987721	0.976569	0.956561	0.924649	0.879716	0.547565
	MMRF_1603	12894381941	103.179	0.982834	0.96027	0.919154	0.859391	0.784609	0.398292
	MMRF_1605	19416877044	154.483	0.987526	0.977268	0.960612	0.935706	0.901678	0.641164
	MMRF_1607	16899026148	122.507	0.987796	0.97415	0.949802	0.912124	0.861428	0.522251
	MMRF_1608	18084413794	128.819	0.988785	0.977265	0.956436	0.924079	0.879734	0.560455
	MMRF_1610	14126713403	102.068	0.986102	0.965631	0.927292	0.870387	0.798326	0.410663
	MMRF_1613	19358726689	151.517	0.988419	0.977077	0.957585	0.928534	0.889983	0.618254
	MMRF_1614	18664457966	146.291	0.988161	0.975438	0.953223	0.920316	0.877051	0.592233
	MMRF_1617	16543427174	129.681	0.987279	0.972136	0.945161	0.905251	0.853296	0.531504
	MMRF_1618	18631905938	145.966	0.986405	0.9746	0.955398	0.9264	0.886906	0.600634
	MMRF_1621	19063299496	147.654	0.987837	0.975827	0.95541	0.925514	0.885776	0.605639
	MMRF_1622	19198937923	128.436	0.988588	0.975929	0.953107	0.918096	0.870949	0.548451
	MMRF_1624	19737837642	130.403	0.987335	0.974332	0.952024	0.91786	0.871803	0.55154
	MMRF_1625	17075165417	133.83	0.987343	0.972655	0.94662	0.908146	0.858183	0.546454
	MMRF_1627	18951598665	126.011	0.986051	0.973067	0.950509	0.914865	0.865418	0.527381
	MMRF_1628	15644120057	113.977	0.986641	0.972556	0.946169	0.904238	0.847182	0.47832
	MMRF_1629	15051183773	110.312	0.986572	0.969387	0.93807	0.890264	0.82734	0.452323
	MMRF_1630	17598918072	123.353	0.987192	0.973212	0.948087	0.909345	0.857353	0.517063
	MMRF_1633	14744962651	102.693	0.983201	0.963138	0.92566	0.867773	0.792808	0.394564
	MMRF_1634	21932551634	168.133	0.988963	0.979436	0.964365	0.942002	0.911977	0.678959
	MMRF_1637	21786326754	135.307	0.986574	0.975	0.955476	0.924715	0.8818	0.567943
	MMRF_1638	16476510843	132.342	0.98869	0.976135	0.952725	0.915818	0.866061	0.548531
	MMRF_1639	16419083557	110.511	0.98455	0.968428	0.939072	0.892864	0.830639	0.45216
	MMRF_1640	17702915850	115.917	0.986011	0.968248	0.936514	0.888929	0.827122	0.465158
	MMRF_1641	15715205010	116.244	0.985689	0.967849	0.936464	0.889764	0.829172	0.469891
	MMRF_1642	17208781097	106.689	0.986598	0.970807	0.941859	0.897055	0.836826	0.453937
	MMRF_1643	18019228515	121.2	0.986392	0.969881	0.940881	0.8972	0.840228	0.492593
	MMRF_1644	17956276144	118.057	0.98532	0.969625	0.941753	0.898667	0.840887	0.480886
	MMRF_1645	19639894646	159.55	0.987666	0.978355	0.963657	0.941806	0.912041	0.671326
	MMRF_1646	17131655017	122.015	0.986189	0.970441	0.942855	0.901652	0.847698	0.509123
	MMRF_1647	16404925385	115.223	0.987881	0.973601	0.946813	0.905464	0.849975	0.488366
	MMRF_1650	15221973613	102.146	0.984189	0.967094	0.935272	0.885124	0.817156	0.414501
	MMRF_1651	13803778737	98.4592	0.981377	0.953397	0.904605	0.835802	0.753138	0.364629
	MMRF_1652	12308182497	100.465	0.980836	0.95516	0.910081	0.845144	0.765614	0.376787
	MMRF_1654	15956080693	103.065	0.986032	0.968003	0.934407	0.883494	0.816789	0.429384
	MMRF_1655	14819322785	119.205	0.984421	0.962506	0.923446	0.868328	0.801734	0.46999
	MMRF_1656	12098543681	99.8522	0.980204	0.954082	0.908086	0.842123	0.76166	0.372683
	MMRF_1659	21185341548	162.534	0.987861	0.978756	0.964821	0.944315	0.916155	0.683921
	MMRF_1662	18044545287	125.894	0.988944	0.976757	0.954342	0.920029	0.873848	0.549206
	MMRF_1664	19340939264	145.6	0.987438	0.976423	0.958363	0.931024	0.893945	0.617192
	MMRF_1665	15065635607	113.775	0.982729	0.963028	0.928666	0.877945	0.813157	0.449956
	MMRF_1667	15430825501	110.1	0.986062	0.970958	0.942722	0.897324	0.835577	0.452266
	MMRF_1668	19079918026	144.015	0.987719	0.976561	0.958082	0.930141	0.892018	0.610686
	MMRF_1670	17250535878	115.031	0.987437	0.971137	0.940827	0.894535	0.834196	0.473837
	MMRF_1671	22936484215	184.337	0.991687	0.987081	0.979016	0.966118	0.947112	0.758959
	MMRF_1672	17284586498	124.592	0.985333	0.971401	0.94706	0.909324	0.858421	0.524978
	MMRF_1676	14904053384	111.328	0.985125	0.969041	0.939816	0.893429	0.830702	0.452646
	MMRF_1677	11817130633	87.1931	0.980258	0.947628	0.888661	0.80576	0.708871	0.298962
	MMRF_1678	14017998940	90.2975	0.983962	0.95989	0.914398	0.846678	0.761954	0.3435
	MMRF_1680	14977527181	104.678	0.985397	0.966357	0.931768	0.879316	0.811258	0.423902
	MMRF_1682	14625603317	97.5531	0.984489	0.963535	0.925295	0.867756	0.793539	0.388078
	MMRF_1683	16643019558	122.316	0.985961	0.970258	0.94233	0.900025	0.844693	0.501175
	MMRF_1686	15821163587	103.951	0.98536	0.96913	0.938833	0.890559	0.825617	0.42912
	MMRF_1687	10081434372	72.4971	0.978493	0.933659	0.851769	0.742031	0.622406	0.211831
	MMRF_1689	16635363142	125.617	0.985083	0.97031	0.945527	0.908162	0.858266	0.529958
	MMRF_1690	15571984348	101.678	0.985556	0.96887	0.937361	0.887158	0.819329	0.414307
	MMRF_1695	18112290899	130.459	0.987162	0.973883	0.950666	0.915549	0.868268	0.548126
	MMRF_1698	12226740554	82.4906	0.9819	0.953432	0.897654	0.814573	0.713098	0.281091
	MMRF_1700	16892672646	118.68	0.987818	0.973729	0.947663	0.907679	0.85447	0.508785
	MMRF_1703	16805206336	122.018	0.987915	0.973888	0.948448	0.909282	0.856694	0.513499
	MMRF_1705	15008580649	99.7774	0.985165	0.965751	0.930189	0.875651	0.805003	0.40394
	MMRF_1706	12342966191	24.9175	0.936008	0.66687	0.304457	0.093784	0.022205	0.000139
	MMRF_1710	16696403799	120.059	0.984916	0.96964	0.94253	0.900424	0.84362	0.489768
	MMRF_1713	20312477687	152.618	0.985695	0.975382	0.959961	0.937073	0.905239	0.648106
	MMRF_1714	17811382870	131.143	0.986912	0.973283	0.94952	0.913578	0.865452	0.544821
	MMRF_1715	20208496653	165.457	0.986122	0.977214	0.964244	0.945422	0.919265	0.694124
	MMRF_1716	16002802416	103.833	0.984967	0.968908	0.93964	0.892875	0.829074	0.431165
	MMRF_1717	11280675652	82.4026	0.981285	0.94828	0.887034	0.800475	0.699284	0.283408
	MMRF_1718	5121537405	41.0322	0.93993	0.788095	0.586515	0.407393	0.275604	0.045203
	MMRF_1719	14361548380	105.508	0.983961	0.962515	0.92433	0.868112	0.797193	0.415886
	MMRF_1720	21073132960	170.818	0.987901	0.979408	0.966624	0.947873	0.922359	0.707417
	MMRF_1721	13110366320	99.5165	0.982871	0.958463	0.913994	0.849251	0.769403	0.373877
	MMRF_1722	18505484453	138.656	0.986224	0.973976	0.954347	0.924717	0.884589	0.592802
	MMRF_1723	14036280202	93.7941	0.983166	0.962297	0.922424	0.859989	0.779068	0.358891
	MMRF_1725	16249341280	114.595	0.987571	0.971689	0.942249	0.897704	0.839452	0.484859
	MMRF_1726	18406587884	119.729	0.988281	0.973956	0.946976	0.905717	0.850863	0.502729
	MMRF_1727	19001298125	130.457	0.987075	0.974579	0.953597	0.921776	0.878101	0.563778
	MMRF_1730	15087134142	112.744	0.985213	0.966982	0.933726	0.883759	0.819085	0.451009
	MMRF_1731	17005200218	115.989	0.986356	0.973061	0.948889	0.910361	0.857329	0.49732
	MMRF_1733	15900026537	112.796	0.985944	0.96819	0.936675	0.889222	0.827855	0.462589
	MMRF_1735	16689710318	109.469	0.987307	0.971057	0.939622	0.890872	0.826105	0.446647
	MMRF_1736	15891904604	112.358	0.985184	0.966888	0.934851	0.887247	0.825775	0.460813
	MMRF_1738	18065140671	123.788	0.986089	0.973379	0.951591	0.917554	0.869792	0.529126
	MMRF_1739	22636321090	147.031	0.988341	0.97972	0.964618	0.940505	0.90605	0.629918
	MMRF_1740	20097659395	141.141	0.987895	0.976614	0.956925	0.927019	0.886517	0.594367
	MMRF_1744	20711568110	134.174	0.987655	0.977365	0.958618	0.928378	0.885754	0.57248
	MMRF_1746	16383548823	119.008	0.98648	0.973183	0.949172	0.911397	0.858984	0.503846
	MMRF_1749	18194268481	127.097	0.989043	0.977244	0.955803	0.922733	0.87768	0.556129
	MMRF_1750	17167285863	121.754	0.98721	0.97515	0.953377	0.918724	0.870214	0.525248
	MMRF_1753	11536176922	69.1095	0.978126	0.929212	0.841532	0.727057	0.604635	0.195868
	MMRF_1755	16403512816	124.89	0.98668	0.971346	0.944489	0.904134	0.850843	0.514051
	MMRF_1758	14800197271	109.781	0.984318	0.966841	0.934803	0.885212	0.819354	0.439151
	MMRF_1759	19247479347	136.895	0.987831	0.975527	0.953457	0.919963	0.875376	0.570625
	MMRF_1760	19076108813	153.426	0.98976	0.980592	0.964084	0.937998	0.901817	0.630855
	MMRF_1761	15358774436	108.128	0.987166	0.970735	0.940161	0.892832	0.830112	0.447974
	MMRF_1763	19909356022	132.065	0.98772	0.976851	0.9583	0.929783	0.890471	0.589638
	MMRF_1766	13303522216	90.4864	0.984108	0.959434	0.912993	0.843784	0.757249	0.337371
	MMRF_1768	17821982415	126.139	0.985921	0.972702	0.949904	0.914367	0.866033	0.533174
	MMRF_1773	16460187770	119.491	0.986124	0.969667	0.940655	0.8975	0.841126	0.4951
	MMRF_1774	16176885489	114.891	0.987813	0.972968	0.94528	0.902537	0.84552	0.48334
	MMRF_1775	15906209398	115.689	0.985905	0.968717	0.938441	0.893254	0.834637	0.479247
	MMRF_1777	18617461765	130	0.986259	0.974032	0.952663	0.919524	0.874062	0.555482
	MMRF_1778	16227607422	107.796	0.98803	0.972757	0.943952	0.89862	0.838135	0.454196
	MMRF_1780	15574662473	105.579	0.986542	0.969255	0.936842	0.887346	0.822768	0.437871
	MMRF_1781	19067581318	121.1	0.986684	0.975246	0.955411	0.923659	0.878599	0.538
	MMRF_1782	18514950196	136.207	0.985242	0.97267	0.951997	0.920704	0.877898	0.574945
	MMRF_1783	15424772939	107.834	0.98713	0.969536	0.936335	0.886159	0.821451	0.445833
	MMRF_1784	21646431924	135.905	0.989756	0.98055	0.964264	0.938613	0.902529	0.614364
	MMRF_1786	17382417091	126.396	0.987019	0.975348	0.954534	0.921774	0.875536	0.541311
	MMRF_1787	21259276097	138.082	0.989539	0.979543	0.961554	0.933428	0.894746	0.60253
	MMRF_1790	17218806426	121.671	0.985388	0.971653	0.948398	0.911665	0.860894	0.513877
	MMRF_1792	18993729903	134.258	0.986048	0.974249	0.954616	0.9242	0.882351	0.575729
	MMRF_1793	16258905600	111.276	0.987466	0.972184	0.943329	0.898582	0.839145	0.468729
	MMRF_1794	16391400737	108.149	0.986009	0.969718	0.939944	0.894071	0.833229	0.454269
	MMRF_1795	17420274899	128.732	0.985959	0.972831	0.950548	0.916355	0.869751	0.546405
	MMRF_1796	15668631116	110.335	0.984612	0.967262	0.936181	0.888367	0.82537	0.451677
	MMRF_1797	17669392564	118.791	0.987376	0.972915	0.947007	0.907408	0.854515	0.511274
	MMRF_1801	16399754907	109.426	0.988017	0.971906	0.941173	0.894359	0.8329	0.459734
	MMRF_1802	11118577248	77.5623	0.980197	0.939916	0.865683	0.765588	0.654316	0.248091
	MMRF_1803	14672811641	103.411	0.985072	0.966374	0.932152	0.879636	0.811654	0.419619
	MMRF_1807	15894061957	108.832	0.987472	0.970297	0.938084	0.889455	0.826127	0.452584
	MMRF_1808	16674345679	123.512	0.98616	0.97033	0.942743	0.901513	0.847564	0.511269
	MMRF_1810	15593143338	111.668	0.984811	0.96798	0.937401	0.89027	0.827748	0.454328
	MMRF_1814	15865612112	117.491	0.98538	0.968146	0.938535	0.894338	0.836852	0.486614
	MMRF_1815	15636540330	108.655	0.984558	0.967672	0.937255	0.889498	0.825	0.439715
	MMRF_1816	15581905933	106.462	0.984454	0.96861	0.939795	0.893876	0.831252	0.441377
	MMRF_1819	16077425269	111.873	0.987705	0.971642	0.941684	0.896027	0.83614	0.472133
	MMRF_1820	13587666132	95.9614	0.983065	0.962667	0.92425	0.864146	0.785428	0.371175
	MMRF_1822	14382736649	106.899	0.984136	0.963014	0.925607	0.870841	0.801783	0.426757
	MMRF_1824	17928241557	127.635	0.985915	0.973489	0.95241	0.919364	0.873479	0.543036
	MMRF_1825	16359592970	114.548	0.985636	0.968152	0.936886	0.889996	0.829462	0.473393
	MMRF_1830	14672406423	109.518	0.982739	0.963363	0.92931	0.877906	0.811623	0.438722
	MMRF_1831	17646810649	125.853	0.987489	0.973622	0.948823	0.911388	0.8616	0.533164
	MMRF_1832	15919940358	107.98	0.987465	0.970237	0.937724	0.888534	0.824796	0.44865
	MMRF_1833	16148217325	112.857	0.986317	0.969996	0.940762	0.896073	0.836907	0.469923
	MMRF_1834	19191799973	126.81	0.986541	0.975495	0.956896	0.927549	0.886047	0.564844
	MMRF_1835	17636475563	128.989	0.988182	0.975905	0.954148	0.920368	0.874168	0.54978
	MMRF_1838	17299531174	119.829	0.987195	0.972287	0.945537	0.9043	0.849188	0.49634
	MMRF_1839	16624223328	110.969	0.986369	0.972342	0.9462	0.904434	0.847054	0.471418
	MMRF_1841	15174341454	104.948	0.984103	0.967064	0.935949	0.886675	0.82013	0.42675
	MMRF_1842	17196529233	118.791	0.986466	0.972284	0.947474	0.909487	0.858239	0.513561
	MMRF_1846	15172111599	102.549	0.985735	0.967426	0.933456	0.881063	0.812753	0.41527
	MMRF_1847	16219877974	109.855	0.986363	0.97018	0.940944	0.89613	0.836335	0.462347
	MMRF_1850	18040364677	120.296	0.988161	0.975103	0.951311	0.914436	0.864881	0.52354
	MMRF_1851	18716229749	123.862	0.987583	0.973632	0.948399	0.910108	0.859298	0.527201
	MMRF_1855	15899672978	108.607	0.985014	0.969275	0.940457	0.894923	0.833092	0.450485
	MMRF_1856	15730827790	104.735	0.98628	0.968742	0.936288	0.886504	0.820937	0.430245
	MMRF_1857	16186665980	107.841	0.986425	0.969692	0.939003	0.891833	0.829486	0.448755
	MMRF_1858	11575442350	81.7988	0.980747	0.948092	0.887853	0.801677	0.699434	0.275166
	MMRF_1859	14080910009	101.836	0.983881	0.961638	0.920555	0.8597	0.78331	0.390977
	MMRF_1860	12813289201	95.2465	0.982686	0.956135	0.907113	0.836341	0.750352	0.352239
	MMRF_1861	17574203298	121.919	0.985923	0.972348	0.948747	0.911812	0.860612	0.511692
	MMRF_1862	19882557830	133.854	0.987008	0.976176	0.958227	0.930131	0.890238	0.581373
	MMRF_1865	10964925940	80.2955	0.979799	0.945186	0.879018	0.784636	0.675635	0.259665
	MMRF_1866	13875312519	108.568	0.985294	0.963536	0.924393	0.866938	0.795382	0.425865
	MMRF_1867	15061406229	103.24	0.9845	0.967344	0.93569	0.885768	0.818306	0.418445
	MMRF_1871	11617144928	85.2204	0.980354	0.950187	0.89232	0.806869	0.705286	0.288948
	MMRF_1873	12847723395	87.716	0.982106	0.958049	0.911637	0.83969	0.748832	0.315651
	MMRF_1876	14076548848	104.648	0.983905	0.964935	0.929012	0.873642	0.801314	0.41037
	MMRF_1879	16998019994	115.788	0.986845	0.972323	0.946158	0.905957	0.851881	0.495931
	MMRF_1880	17113342680	120.165	0.985587	0.971959	0.948395	0.911211	0.859696	0.507556
	MMRF_1881	16023127029	111.706	0.986051	0.970007	0.941221	0.897073	0.838269	0.469992
	MMRF_1882	15092965121	103.119	0.985544	0.966891	0.932571	0.879937	0.811092	0.418451
	MMRF_1886	14985936197	101.974	0.985279	0.965784	0.929951	0.875493	0.804793	0.40834
	MMRF_1888	17060778039	131.897	0.987385	0.973879	0.949177	0.911082	0.860032	0.53716
	MMRF_1889	19305764840	131.235	0.987538	0.976792	0.958114	0.928699	0.887034	0.56837
	MMRF_1890	20473878432	147.093	0.988525	0.979384	0.963498	0.938429	0.903037	0.625591
	MMRF_1891	20973035327	140.205	0.989034	0.978812	0.961347	0.934287	0.896866	0.608157
	MMRF_1893	10814169600	80.431	0.979659	0.941437	0.87155	0.775982	0.668184	0.262573
	MMRF_1895	20055125248	126.697	0.988801	0.977917	0.958405	0.927959	0.885854	0.56858
	MMRF_1897	15663833133	105.413	0.984798	0.964169	0.927105	0.872086	0.803058	0.424763
	MMRF_1900	14180356905	106.524	0.985433	0.965991	0.929979	0.875478	0.805311	0.420874
	MMRF_1906	19781262052	121.635	0.988845	0.977618	0.957231	0.925138	0.88051	0.548181
	MMRF_1908	15434700179	120.433	0.985396	0.9687	0.938193	0.891703	0.831168	0.484754
	MMRF_1910	17417173445	121.699	0.987353	0.972767	0.946915	0.907415	0.854078	0.507396
	MMRF_1911	19172018246	132.878	0.988365	0.976688	0.95614	0.924328	0.880783	0.5687
	MMRF_1912	16333887285	104.774	0.986395	0.969803	0.939149	0.891467	0.82776	0.438902
	MMRF_1915	19859175159	138.704	0.987653	0.977874	0.961103	0.934573	0.896745	0.599962
	MMRF_1916	16756304969	130.338	0.986338	0.972481	0.947917	0.909886	0.858774	0.532986
	MMRF_1917	17329015022	113.793	0.987669	0.973033	0.946083	0.904687	0.849132	0.487336
	MMRF_1918	18353593099	141.93	0.987833	0.976154	0.955014	0.922275	0.878077	0.579043
	MMRF_1921	19489598095	126.975	0.988701	0.977303	0.956882	0.925373	0.881923	0.562994
	MMRF_1922	17777902301	115.569	0.987679	0.973885	0.948876	0.909887	0.857247	0.501909
	MMRF_1923	20975910769	168.947	0.988178	0.979472	0.965451	0.944098	0.914596	0.678731
	MMRF_1927	15763436021	101.292	0.986851	0.969829	0.937509	0.887059	0.819684	0.418293
	MMRF_1928	21435649514	150.339	0.988924	0.979483	0.963685	0.939578	0.906482	0.642587
	MMRF_1929	21463930280	158.317	0.988557	0.979977	0.965408	0.942934	0.911435	0.657917
	MMRF_1930	15120048204	110.327	0.986216	0.967637	0.933355	0.881842	0.815923	0.449236
	MMRF_1931	12769450419	100.413	0.982546	0.955523	0.905509	0.834042	0.74895	0.377322
	MMRF_1932	17352822305	119.546	0.987187	0.972453	0.945742	0.90467	0.849868	0.498409
	MMRF_1939	17083726824	126.55	0.988296	0.974529	0.949102	0.910384	0.859043	0.529578
	MMRF_1940	28165758921	203.06	0.990923	0.985154	0.976411	0.963587	0.946027	0.786169
	MMRF_1945	15666769970	109.667	0.985019	0.968936	0.939292	0.892488	0.829617	0.451159
	MMRF_1953	11586774193	80.4981	0.980367	0.946466	0.883415	0.793995	0.689239	0.267515
	MMRF_1955	16530620290	111.189	0.985666	0.970787	0.943273	0.899944	0.840478	0.46587
	MMRF_1957	17273529142	117.005	0.986737	0.97245	0.947212	0.908223	0.85564	0.504898
	MMRF_1963	15517497947	107.875	0.985382	0.968077	0.936703	0.889011	0.826323	0.446685
	MMRF_1965	20488374735	141.698	0.986329	0.973408	0.951004	0.917552	0.873995	0.582801
	MMRF_1967	20000208132	138.283	0.988779	0.977883	0.959321	0.930481	0.89107	0.595162
	MMRF_1970	20403214777	142.284	0.988853	0.978564	0.960839	0.93364	0.896417	0.612173
	MMRF_1971	11701583857	93.874	0.98096	0.949855	0.892973	0.813127	0.721106	0.342911
	MMRF_1972	20244272776	140.152	0.988623	0.977832	0.959112	0.930338	0.890791	0.597125
	MMRF_1974	14926131809	102.574	0.985612	0.964074	0.923338	0.86214	0.78529	0.389559
	MMRF_1977	12947954251	90.8998	0.983526	0.955812	0.90384	0.828168	0.736917	0.323297
	MMRF_1978	17399277388	134.453	0.986856	0.97378	0.950123	0.913545	0.864764	0.548647
	MMRF_1981	17352755139	121.797	0.987412	0.972999	0.94737	0.908119	0.855216	0.509722
	MMRF_1982	16188691941	125.088	0.985851	0.969777	0.940723	0.896577	0.838907	0.501437
	MMRF_1985	14985875448	107.426	0.984994	0.967754	0.935746	0.885117	0.817953	0.427932
	MMRF_1986	14895184528	113.752	0.986329	0.967157	0.932053	0.880358	0.814801	0.455657
	MMRF_1991	14271084273	109.333	0.985265	0.963131	0.922653	0.864141	0.791723	0.424457
	MMRF_1992	16479082143	114.323	0.984986	0.968447	0.938452	0.891283	0.828631	0.457875
	MMRF_1994	17163866739	119.03	0.986529	0.972744	0.94758	0.908136	0.853738	0.494117
	MMRF_1995	17196039616	131.767	0.987681	0.972723	0.946301	0.907025	0.855677	0.537074
	MMRF_1997	10828929918	82.6352	0.978837	0.935584	0.859677	0.760294	0.653408	0.274214
	MMRF_1998	16386438732	115.605	0.986819	0.970685	0.941746	0.897171	0.838125	0.474594
	MMRF_1999	14947438313	113.541	0.985026	0.966031	0.930558	0.87682	0.807858	0.443815
	MMRF_2000	15085970684	105.879	0.985872	0.966567	0.931066	0.87748	0.807856	0.419303
	MMRF_2001	16604758850	127.614	0.98734	0.970584	0.940144	0.895619	0.838943	0.511953
	MMRF_2002	16990909916	121.479	0.986911	0.972443	0.946976	0.907969	0.855655	0.511234
	MMRF_2005	16658211237	116.973	0.985852	0.971149	0.944661	0.903045	0.846044	0.480704
	MMRF_2006	18152372000	138.019	0.987748	0.973836	0.949557	0.913069	0.865151	0.556886
	MMRF_2007	16137346322	113.207	0.986403	0.969205	0.937929	0.890358	0.827813	0.45638
	MMRF_2012	14282695392	110.32	0.984501	0.964479	0.927545	0.87143	0.800103	0.428747
	MMRF_2013	16250380530	115.926	0.987556	0.971654	0.942212	0.897384	0.838398	0.483609
	MMRF_2014	14649133833	113.014	0.985365	0.96405	0.9253	0.8695	0.800115	0.44129
	MMRF_2015	18147216777	137.966	0.988583	0.975707	0.952879	0.918481	0.873038	0.568842
	MMRF_2016	15486850944	110.582	0.986868	0.969292	0.936646	0.886981	0.822402	0.452273
	MMRF_2017	14816916378	108.11	0.986513	0.967458	0.931728	0.87834	0.809931	0.436452
	MMRF_2018	13499052959	96.6962	0.984229	0.960904	0.917972	0.853775	0.773157	0.364289
	MMRF_2019	25075562804	187.182	0.989079	0.982203	0.971628	0.955849	0.934101	0.741537
	MMRF_2021	14026976710	94.3168	0.986282	0.960663	0.912506	0.844547	0.762269	0.363547
	MMRF_2024	18834316586	148.621	0.989338	0.981015	0.965532	0.94002	0.90334	0.619081
	MMRF_2026	16247976228	126.978	0.986321	0.970458	0.942685	0.901633	0.848197	0.519885
	MMRF_2035	18453621837	142.913	0.988002	0.975236	0.953281	0.92038	0.876641	0.582164
	MMRF_2038	16705469347	119.069	0.985908	0.97173	0.946739	0.907391	0.853411	0.496124
	MMRF_2039	17050380845	121.981	0.987926	0.973502	0.946805	0.905893	0.85201	0.512922
	MMRF_2041	16232245670	127.603	0.986489	0.97144	0.94396	0.901587	0.845903	0.512425
	MMRF_2043	17171476544	129.278	0.987508	0.97178	0.943208	0.900634	0.845615	0.519235
	MMRF_2047	16364526686	126.809	0.986856	0.970016	0.93972	0.895087	0.837967	0.507577
	MMRF_2050	15767522821	115.615	0.986331	0.970974	0.942012	0.896788	0.8361	0.475895
	MMRF_2054	17977989188	138.703	0.987934	0.974255	0.950017	0.914009	0.86677	0.56113
	MMRF_2055	23599999273	179.557	0.989026	0.981871	0.970411	0.95304	0.928766	0.719513
	MMRF_2056	13205407357	98.961	0.983401	0.957009	0.907307	0.835177	0.748537	0.368336
	MMRF_2057	17405843818	123.254	0.98635	0.973292	0.950553	0.914586	0.864798	0.52045
	MMRF_2058	10843965319	83.6147	0.979804	0.939634	0.868228	0.773658	0.668813	0.281119
	MMRF_2059	19119825775	143.333	0.988737	0.976035	0.953043	0.9187	0.873577	0.577184
	MMRF_2061	18305483346	128.48	0.986763	0.974722	0.95416	0.922036	0.876917	0.549022
	MMRF_2062	19524903280	150.001	0.988895	0.976952	0.95595	0.924444	0.88299	0.602766
	MMRF_2063	17551286059	133.306	0.987715	0.97244	0.945137	0.904712	0.852685	0.536042
	MMRF_2068	19317242184	137.473	0.988291	0.978476	0.960986	0.93299	0.893576	0.592592
	MMRF_2072	14525195703	110.687	0.984825	0.964476	0.926593	0.869969	0.798452	0.430764
	MMRF_2074	11623497742	90.0704	0.980447	0.948101	0.888089	0.804016	0.706534	0.317501
	MMRF_2076	16513651434	124.022	0.986605	0.971238	0.94248	0.898384	0.840243	0.497214
	MMRF_2079	16883708340	129.534	0.987938	0.973315	0.946572	0.906621	0.85465	0.531951
	MMRF_2080	17959782194	139.43	0.986956	0.974091	0.951127	0.915856	0.868316	0.559882
	MMRF_2081	17032012537	120.601	0.986242	0.972817	0.949266	0.91195	0.860316	0.508017
	MMRF_2082	17872698640	135.612	0.987328	0.97418	0.950402	0.913397	0.863766	0.546521
	MMRF_2083	14932477270	116.553	0.985161	0.968145	0.937127	0.889736	0.827741	0.468479
	MMRF_2085	18887732107	147.736	0.987448	0.975858	0.955705	0.924888	0.883753	0.601699
	MMRF_2087	14769989816	114.666	0.986229	0.967486	0.933543	0.883347	0.819242	0.460748
	MMRF_2089	16670019909	118.73	0.986622	0.972494	0.946224	0.904995	0.848898	0.49605
	MMRF_2090	17884528432	142.252	0.989749	0.979716	0.960885	0.930623	0.888796	0.591535
	MMRF_2091	14787052223	113.632	0.985248	0.965543	0.928944	0.87391	0.804224	0.443697
	MMRF_2093	15992581440	124.987	0.986664	0.970192	0.939719	0.893915	0.834626	0.497552
	MMRF_2095	14173135455	112.522	0.984699	0.965727	0.930337	0.876961	0.80854	0.444833
	MMRF_2098	18292908372	139.065	0.988932	0.975674	0.951315	0.914886	0.867232	0.562771
	MMRF_2101	18485589883	140.859	0.987251	0.975242	0.95376	0.920458	0.875444	0.568943
	MMRF_2102	17214784067	123.205	0.987977	0.973984	0.948303	0.908845	0.856454	0.519596
	MMRF_2106	26642521102	195.495	0.989811	0.983052	0.972977	0.958218	0.938167	0.764327
	MMRF_2107	19452658993	146.59	0.987963	0.976967	0.957451	0.927277	0.885913	0.594577
	MMRF_2112	13856319154	106.492	0.984811	0.96339	0.924381	0.867298	0.795521	0.418982
	MMRF_2113	14732508221	111.266	0.986081	0.966508	0.930741	0.877608	0.810623	0.44664
	MMRF_2114	17193743215	132.127	0.986261	0.973274	0.950435	0.915427	0.867823	0.54597
	MMRF_2115	8956697462	70.8712	0.97443	0.916833	0.819396	0.699499	0.580007	0.208136
	MMRF_2116	21662983152	161.47	0.989712	0.98094	0.966058	0.943575	0.912788	0.66916
	MMRF_2118	22910341860	172.662	0.989567	0.981344	0.96794	0.948034	0.92086	0.700524
	MMRF_2119	33189377870	243.905	0.990629	0.986509	0.980706	0.972542	0.961396	0.850765
	MMRF_2124	19368689849	142.336	0.987482	0.9765	0.957786	0.928839	0.888798	0.596169
	MMRF_2125	18297205347	142.795	0.987562	0.974634	0.952621	0.919933	0.87685	0.586059
	MMRF_2126	39357727702	278.167	0.992515	0.989148	0.984649	0.978444	0.970169	0.890174
	MMRF_2128	18081033472	135.475	0.987173	0.97346	0.948297	0.909742	0.858414	0.540837
	MMRF_2129	17133202506	131.389	0.98683	0.972658	0.946939	0.907335	0.854596	0.528881
	MMRF_2132	25125397068	187.396	0.990648	0.983832	0.972571	0.95553	0.932211	0.737644
	MMRF_2137	11193833747	88.3968	0.980967	0.9465	0.884607	0.79959	0.702015	0.310777
	MMRF_2138	10819567325	86.259	0.980091	0.944503	0.880982	0.793773	0.694319	0.29819
	MMRF_2140	40492192115	283.113	0.99126	0.987924	0.983605	0.977829	0.970136	0.893356
	MMRF_2141	18912404539	146.055	0.988906	0.977484	0.957357	0.927048	0.886697	0.602191
	MMRF_2143	16517913363	123.501	0.987203	0.972255	0.945311	0.904603	0.851022	0.512775
	MMRF_2144	28757929951	205.409	0.991212	0.985611	0.97677	0.963556	0.945348	0.783056
	MMRF_2147	17888458039	116.287	0.988265	0.972797	0.943261	0.898326	0.839682	0.487767
	MMRF_2150	30042744486	226.072	0.989748	0.98447	0.977362	0.967489	0.954162	0.825384
	MMRF_2151	8778383480	70.7815	0.972492	0.914457	0.816949	0.697693	0.57828	0.206436
	MMRF_2152	16548682449	127.541	0.986032	0.972341	0.948642	0.911666	0.861565	0.527425
	MMRF_2153	19369796510	147.331	0.98877	0.977677	0.958246	0.929013	0.889709	0.607545
	MMRF_2159	34078026283	243.477	0.990958	0.986987	0.981409	0.973483	0.962586	0.853053
	MMRF_2160	16147869807	121.083	0.987121	0.970872	0.941277	0.897144	0.839782	0.496919
	MMRF_2166	15724780900	119.108	0.986434	0.969733	0.939541	0.89415	0.835553	0.487833
	MMRF_2167	14348738849	107.85	0.98606	0.965767	0.927799	0.871779	0.800917	0.428716
	MMRF_2168	31666568719	189.834	0.991544	0.986223	0.977574	0.964327	0.945653	0.774373
	MMRF_2170	15376629086	115.982	0.985593	0.968798	0.937875	0.890333	0.827651	0.469447
	MMRF_2172	14975414227	109.807	0.985214	0.967962	0.935555	0.885182	0.819259	0.447106
	MMRF_2173	25899630909	188.804	0.989559	0.983271	0.973475	0.958603	0.937641	0.746861
	MMRF_2174	16514592806	123.141	0.987167	0.971996	0.944767	0.903818	0.849872	0.511547
	MMRF_2176	10522799980	82.0686	0.978492	0.939676	0.868387	0.771103	0.663842	0.274337
	MMRF_2180	37382635205	268.07	0.990983	0.98725	0.982448	0.975927	0.967197	0.879899
	MMRF_2181	18818243940	114.833	0.987151	0.972637	0.94431	0.899536	0.839528	0.483056
	MMRF_2183	13983596927	104.598	0.984709	0.963879	0.924411	0.86489	0.789662	0.410125
	MMRF_2185	20986543422	166.832	0.990556	0.982984	0.969497	0.948315	0.918531	0.678157
	MMRF_2186	21560302282	156.566	0.989274	0.979416	0.962444	0.93684	0.902215	0.642895
	MMRF_2190	32257584046	232.634	0.990479	0.985965	0.97937	0.969852	0.956694	0.828703
	MMRF_2191	16071980896	113.032	0.987133	0.968515	0.933512	0.881212	0.814875	0.455325
	MMRF_2194	15561667851	114.409	0.987071	0.969509	0.936769	0.887469	0.82424	0.466611
	MMRF_2195	19431462457	141.439	0.988888	0.977719	0.958008	0.92789	0.887264	0.597895
	MMRF_2196	18350525941	128.58	0.987975	0.976044	0.954115	0.919222	0.871556	0.545753
	MMRF_2197	18075557382	130.147	0.988346	0.975557	0.952763	0.917681	0.870805	0.553044
	MMRF_2198	14598241926	109.868	0.986088	0.966571	0.931018	0.878194	0.810573	0.439813
	MMRF_2199	13788457249	104.683	0.984646	0.964393	0.926228	0.867783	0.793042	0.409239
	MMRF_2200	18962232675	135.618	0.988903	0.977318	0.956528	0.924694	0.881762	0.578752
	MMRF_2201	15578473682	118.574	0.986677	0.969675	0.938806	0.892456	0.832771	0.484353
	MMRF_2204	13541523205	105.099	0.984229	0.95987	0.916091	0.853339	0.776782	0.407249
	MMRF_2207	19637998303	144.972	0.989164	0.978563	0.95966	0.930894	0.892077	0.610016
	MMRF_2209	14212011612	107.486	0.985379	0.96383	0.924651	0.867228	0.795359	0.42416
	MMRF_2211	13005144091	98.1211	0.984463	0.959073	0.912145	0.844101	0.761594	0.372279
	MMRF_2213	8872334840	70.3423	0.973833	0.918449	0.820104	0.697522	0.576019	0.203966
	MMRF_2214	20138275855	154.441	0.988525	0.97798	0.960197	0.93362	0.897803	0.632479
	MMRF_2215	12890260293	100.93	0.981654	0.954005	0.905769	0.837737	0.756435	0.381222
	MMRF_2216	15722971793	115.518	0.98668	0.969476	0.937958	0.890772	0.829651	0.47496
	MMRF_2217	13036403077	99.3928	0.984075	0.958538	0.911703	0.844474	0.762598	0.378625
	MMRF_2220	18309143666	137.188	0.987262	0.975983	0.956257	0.925543	0.883095	0.578822
	MMRF_2222	14648330104	104.264	0.985191	0.965687	0.928261	0.870951	0.797247	0.412751
	MMRF_2223	14735067410	122.195	0.985832	0.968094	0.935672	0.887448	0.826049	0.492013
	MMRF_2224	18349955750	150.182	0.98845	0.975934	0.95394	0.92146	0.879138	0.602442
	MMRF_2225	15497029720	129.323	0.986	0.969444	0.939705	0.895587	0.838871	0.519564
	MMRF_2226	17466994538	135.643	0.988102	0.974232	0.949732	0.913226	0.86558	0.557615
	MMRF_2228	19024975766	144.963	0.988243	0.975976	0.954353	0.922022	0.879565	0.593817
	MMRF_2229	18102514532	147.413	0.988299	0.975928	0.95392	0.921254	0.878427	0.595886
	MMRF_2230	16422057352	123.697	0.986893	0.972726	0.945944	0.904439	0.849113	0.50861
	MMRF_2232	27171478871	181.926	0.990403	0.984909	0.97586	0.961788	0.941654	0.752
	MMRF_2238	14510226164	104.762	0.985534	0.963244	0.921911	0.861226	0.78621	0.411676
	MMRF_2239	16614678537	132.402	0.987412	0.975465	0.95356	0.918494	0.869674	0.555964
	MMRF_2240	16794936117	115.319	0.987567	0.970773	0.939231	0.891394	0.829692	0.473129
	MMRF_2245	15702092830	130.017	0.986279	0.970858	0.94295	0.900897	0.846128	0.525199
	MMRF_2246	26472625017	180.622	0.99	0.983857	0.973876	0.958625	0.936978	0.739146
	MMRF_2250	14911987567	112.877	0.985392	0.967992	0.935619	0.885639	0.820617	0.455009
	MMRF_2251	13881742808	104.688	0.984416	0.964766	0.927694	0.871224	0.798539	0.417412
	MMRF_2253	17308100296	121.559	0.98742	0.972483	0.94535	0.90376	0.848814	0.503785
	MMRF_2257	19940576169	163.59	0.989263	0.978782	0.960862	0.934097	0.898582	0.649334
	MMRF_2258	15925437797	113.531	0.986362	0.969854	0.938511	0.889838	0.825566	0.461296
	MMRF_2266	16234602926	118.585	0.987402	0.971149	0.940895	0.89566	0.836916	0.488072
	MMRF_2267	18709394481	126.601	0.987863	0.975794	0.952863	0.916328	0.865888	0.531998
	MMRF_2268	18826482900	154.471	0.988441	0.976563	0.956224	0.926016	0.886403	0.618724
	MMRF_2269	19634986769	150.463	0.987526	0.976718	0.958262	0.929996	0.891672	0.615071
	MMRF_2270	17774828965	137.102	0.9883	0.975347	0.952789	0.918832	0.873864	0.56987
	MMRF_2271	17927158157	122.312	0.987386	0.974472	0.950187	0.911831	0.859394	0.512648
	MMRF_2272	14608439932	96.3093	0.985826	0.962247	0.916965	0.850878	0.769376	0.372533
	MMRF_2273	17121536584	139.967	0.987203	0.97442	0.95129	0.916088	0.869193	0.569905
	MMRF_2279	19372494164	150.268	0.990569	0.982385	0.967472	0.943314	0.908724	0.636023
	MMRF_2281	19660566095	131.007	0.989605	0.977573	0.954661	0.919411	0.871884	0.552873
	MMRF_2284	15057419825	109.756	0.985099	0.967426	0.933895	0.882571	0.815477	0.44328
	MMRF_2286	20390575032	166.802	0.988508	0.978541	0.961315	0.935141	0.900361	0.653982
	MMRF_2288	18835917992	146.443	0.987091	0.975648	0.956049	0.926268	0.885863	0.599829
	MMRF_2289	16111193674	112.207	0.986876	0.96907	0.936089	0.886498	0.822717	0.459003
	MMRF_2290	16108868390	113.489	0.986947	0.970921	0.939758	0.89091	0.826895	0.462554
	MMRF_2291	16269097551	110.732	0.987289	0.9705	0.938963	0.890658	0.827312	0.454474
	MMRF_2293	19870669521	162.094	0.989448	0.978991	0.96084	0.933666	0.897613	0.645265
	MMRF_2297	15026952403	117.761	0.98461	0.964917	0.931234	0.882251	0.820317	0.47248
	MMRF_2300	20994971093	170.289	0.989782	0.980329	0.964371	0.940506	0.908581	0.673201
	MMRF_2301	16139097539	133.406	0.987188	0.970484	0.940681	0.897759	0.843846	0.535665
	MMRF_2302	17863322771	141.2	0.986864	0.972747	0.949194	0.914973	0.870314	0.57621
	MMRF_2305	22365292005	183.33	0.989552	0.981096	0.967401	0.947264	0.9203	0.710276
	MMRF_2306	19550632638	150.077	0.988029	0.976272	0.956395	0.926854	0.887955	0.614341
	MMRF_2307	17357065480	139.904	0.98819	0.974412	0.94974	0.913327	0.866151	0.570916
	MMRF_2308	18617871599	147.209	0.989031	0.98045	0.964138	0.937469	0.899115	0.612231
	MMRF_2310	14546773373	97.1536	0.985497	0.962773	0.920223	0.857061	0.777775	0.378645
	MMRF_2313	19710467948	158.829	0.989318	0.978949	0.96104	0.934209	0.898272	0.640958
	MMRF_2314	22459200297	181.98	0.989291	0.980827	0.967172	0.94709	0.920142	0.708159
	MMRF_2316	16948602782	118.237	0.988047	0.972449	0.94291	0.897941	0.839287	0.489233
	MMRF_2317	15525646000	126.927	0.986779	0.969747	0.93929	0.894346	0.837492	0.511824
	MMRF_2324	18346042934	142.403	0.988267	0.975556	0.953781	0.921244	0.878042	0.584459
	MMRF_2326	15678103857	122.129	0.986641	0.969137	0.938082	0.89228	0.833423	0.49129
	MMRF_2327	18767727020	148.852	0.988532	0.976042	0.954179	0.921725	0.879727	0.604642
	MMRF_2328	19398417874	156.741	0.989186	0.978315	0.959401	0.931006	0.893423	0.630625
	MMRF_2329	13791854841	99.0532	0.984547	0.960516	0.916007	0.851622	0.77175	0.380831
	MMRF_2330	18428802270	142.983	0.987081	0.973729	0.951009	0.917453	0.873593	0.582081
	MMRF_2331	16547627478	128.93	0.985292	0.970326	0.944343	0.904916	0.852717	0.52667
	MMRF_2333	15147742458	120.867	0.984192	0.967838	0.939067	0.895364	0.837592	0.488378
	MMRF_2335	14935288934	123.039	0.986335	0.967889	0.934429	0.886062	0.825306	0.494429
	MMRF_2336	17914021840	145.479	0.987579	0.97577	0.954664	0.922298	0.879111	0.591041
	MMRF_2339	18314494553	151.168	0.987215	0.975369	0.955077	0.924574	0.883965	0.608077
	MMRF_2341	22023525257	171.48	0.988763	0.979405	0.964989	0.943992	0.915755	0.691384
	MMRF_2344	13722369411	108.354	0.986756	0.968574	0.933138	0.878498	0.807586	0.439599
	MMRF_2352	16510085333	128.941	0.986459	0.969675	0.940478	0.89792	0.843731	0.522596
	MMRF_2353	19740710619	150.355	0.988731	0.977292	0.957927	0.928832	0.890108	0.615839
	MMRF_2362	11929305699	94.0851	0.980859	0.948431	0.891501	0.813542	0.723477	0.345362
	MMRF_2363	15533016673	118.423	0.984687	0.967109	0.93618	0.889863	0.829314	0.478654
	MMRF_2364	17915316210	145.081	0.987952	0.974329	0.95078	0.916173	0.87125	0.585435
	MMRF_2365	18138717593	148.213	0.987235	0.975316	0.954601	0.923066	0.881001	0.597362
	MMRF_2366	16894218240	133.502	0.985011	0.970577	0.946415	0.910235	0.861906	0.542682
	MMRF_2368	16091420677	134.517	0.98611	0.970554	0.943113	0.902168	0.849622	0.54169
	MMRF_2373	18434673589	143.029	0.987808	0.974811	0.9525	0.919465	0.87598	0.584862
	MMRF_2378	15978680705	125.129	0.985635	0.967674	0.936255	0.890538	0.833046	0.504374
	MMRF_2379	16508442996	137.14	0.987346	0.971332	0.942999	0.902178	0.850712	0.549929
	MMRF_2380	21679575376	174.918	0.989843	0.981053	0.966059	0.943676	0.913652	0.687992
	MMRF_2384	17061217807	135.365	0.985908	0.971734	0.946942	0.909732	0.860508	0.553102
	MMRF_2386	16167246547	131.697	0.985871	0.968087	0.937201	0.892843	0.837529	0.525321
	MMRF_2388	14639316764	115.243	0.984707	0.966209	0.932482	0.881801	0.816247	0.457577
	MMRF_2397	22762458475	167.83	0.989452	0.979954	0.964102	0.940523	0.90897	0.671829
	MMRF_2400	18144280461	145.581	0.987805	0.975009	0.952856	0.920095	0.876952	0.590419
	MMRF_2401	19057421297	152.487	0.990019	0.980809	0.964025	0.937688	0.901126	0.628221
	MMRF_2402	18328630233	143.61	0.990244	0.981478	0.965657	0.939756	0.902862	0.613015
	MMRF_2404	17577660449	136.483	0.987138	0.973414	0.949918	0.91507	0.869371	0.563157
	MMRF_2407	16364664790	124.99	0.986032	0.968996	0.938853	0.894682	0.838124	0.506941
	MMRF_2409	15979649672	120.303	0.987856	0.973628	0.946561	0.903963	0.846602	0.500912
	MMRF_2410	18837401531	144.442	0.987848	0.975529	0.95449	0.923036	0.881206	0.59475
	MMRF_2413	15122032747	120.065	0.985884	0.967215	0.933928	0.885262	0.823893	0.482306
	MMRF_2419	18826336831	154.802	0.988257	0.975869	0.954641	0.923692	0.883626	0.617103
	MMRF_2422	14548267932	119.618	0.985736	0.966104	0.931351	0.881089	0.818209	0.478447
	MMRF_2425	15381331603	129.759	0.98546	0.966788	0.934573	0.888926	0.832193	0.518971
	MMRF_2426	19947803024	156.97	0.987879	0.977974	0.961467	0.936345	0.901739	0.641185
	MMRF_2427	17124186348	136.198	0.989925	0.980008	0.96096	0.929832	0.886334	0.578112
	MMRF_2428	17618348533	143.071	0.986817	0.972037	0.946921	0.910321	0.863911	0.57476
	MMRF_2429	17672626376	143.868	0.988076	0.97502	0.952162	0.918376	0.87422	0.584182
	MMRF_2433	16715029650	136.283	0.986944	0.972176	0.946179	0.90792	0.858641	0.552586
	MMRF_2436	18158481392	143.257	0.990252	0.981195	0.964186	0.936506	0.897406	0.607126
	MMRF_2438	17973427576	142.603	0.988875	0.980143	0.963968	0.937142	0.898424	0.603864
	MMRF_2440	12712720824	108.096	0.982448	0.954523	0.906658	0.84162	0.76566	0.419739
	MMRF_2442	21611708031	174.058	0.990648	0.983927	0.972539	0.954557	0.929182	0.709829
	MMRF_2444	17686999584	137.303	0.987347	0.975203	0.953428	0.920007	0.874524	0.56948
	MMRF_2446	14845055811	117.667	0.987776	0.975512	0.950856	0.909283	0.850601	0.491682
	MMRF_2449	21368546379	173.026	0.989698	0.983433	0.973193	0.957028	0.9334	0.712459
	MMRF_2452	12823638060	103.212	0.98392	0.958407	0.912507	0.847438	0.769243	0.399781
	MMRF_2455	17735491244	145.149	0.987092	0.972524	0.947436	0.911197	0.864838	0.579053
	MMRF_2456	21625565542	172.013	0.990848	0.984081	0.972322	0.953791	0.927499	0.703224
	MMRF_2457	20445788790	166.86	0.989487	0.982745	0.971525	0.953744	0.927643	0.692721
	MMRF_2461	17615982180	140.948	0.988094	0.978531	0.961746	0.9343	0.894555	0.594414
	MMRF_2464	20476161668	165.275	0.989036	0.981884	0.970106	0.951366	0.924169	0.684129
	MMRF_2465	16468669345	130.824	0.98799	0.977151	0.956513	0.922716	0.874698	0.552769
	MMRF_2468	19248321767	150.95	0.99021	0.982103	0.967272	0.94334	0.909361	0.637493
	MMRF_2469	22045303233	173.67	0.989524	0.980332	0.964972	0.942182	0.911774	0.684378
	MMRF_2471	20190269372	162.777	0.989728	0.980753	0.965585	0.942403	0.910673	0.666124
	MMRF_2472	12013323429	100.944	0.981594	0.952396	0.900241	0.827992	0.744115	0.383109
	MMRF_2473	21990253753	175.829	0.989655	0.983391	0.973244	0.957238	0.93411	0.718393
	MMRF_2475	20803899386	169.994	0.990232	0.982847	0.970528	0.951396	0.924571	0.696349
	MMRF_2476	21320046750	169.964	0.990935	0.984172	0.972241	0.953514	0.926833	0.698738
	MMRF_2477	15847896422	130.874	0.985425	0.970097	0.942818	0.901882	0.848402	0.529256
	MMRF_2478	25235847558	199.491	0.991315	0.985965	0.977768	0.96544	0.947986	0.780949
	MMRF_2480	22699264803	181.502	0.990999	0.984612	0.974021	0.957747	0.93468	0.730926
	MMRF_2485	14853369775	117.352	0.987522	0.974493	0.948474	0.905211	0.845194	0.489484
	MMRF_2486	18878978171	148.348	0.989298	0.981355	0.967025	0.943438	0.908685	0.62833
	MMRF_2487	19825660919	159.115	0.989972	0.98173	0.967579	0.9452	0.913741	0.661255
	MMRF_2488	18477444961	146.102	0.99009	0.98138	0.965411	0.939639	0.903236	0.620353
	MMRF_2489	17706934537	144.686	0.989467	0.979258	0.960541	0.931033	0.890443	0.604402
	MMRF_2490	17817451136	140.899	0.989032	0.980632	0.965316	0.93953	0.901639	0.602151
	MMRF_2493	14803597550	117.495	0.987895	0.97227	0.94163	0.894275	0.832088	0.487417
	MMRF_2497	18121095070	142.284	0.988653	0.979586	0.96291	0.935328	0.895477	0.599628
	MMRF_2498	20916388951	169.878	0.99072	0.983681	0.971003	0.950974	0.922877	0.691977
	MMRF_2499	14558353711	115.207	0.98746	0.97363	0.945361	0.898389	0.834104	0.47912
	MMRF_2501	18359323062	146.619	0.989017	0.98053	0.965306	0.940365	0.904075	0.620149
	MMRF_2503	22101244738	176.696	0.990408	0.983523	0.972343	0.955365	0.931199	0.718538
	MMRF_2504	22090502600	176.486	0.99049	0.983771	0.972557	0.955249	0.930717	0.716525
	MMRF_2505	21086189216	168.543	0.99041	0.982932	0.970073	0.949854	0.921474	0.687713
	MMRF_2506	16148139315	128.433	0.988941	0.975832	0.950339	0.910587	0.857302	0.538327
	MMRF_2511	20435874246	161.562	0.990699	0.982995	0.968936	0.9464	0.914843	0.663523
	MMRF_2514	17827600495	141.89	0.988682	0.97912	0.961469	0.93228	0.890694	0.595834
	MMRF_2515	15920247433	127.705	0.988144	0.977747	0.957813	0.924357	0.875687	0.541289
	MMRF_2516	17211033795	137.354	0.989575	0.979122	0.959274	0.927336	0.88329	0.578998
	MMRF_2517	16156944576	128.606	0.989029	0.976583	0.952815	0.914876	0.863481	0.533292
	MMRF_2518	17670236197	144.892	0.987575	0.976045	0.955572	0.923905	0.880946	0.589292
	MMRF_2519	17624424649	141.964	0.98929	0.978663	0.958947	0.928134	0.885756	0.587393
	MMRF_2523	18268337593	145.147	0.988904	0.98026	0.964376	0.938115	0.899819	0.610857
	MMRF_2525	19984883164	156.418	0.988992	0.98123	0.968005	0.946645	0.91534	0.653549
	MMRF_2526	18968382763	155.902	0.987774	0.977654	0.960304	0.933497	0.896428	0.626673
	MMRF_2531	16779695557	134.826	0.9891	0.977801	0.956216	0.92215	0.875897	0.568712
	MMRF_2532	15451016606	123.267	0.989127	0.976546	0.952116	0.913023	0.8592	0.519614
	MMRF_2535	19491713176	158.703	0.986846	0.97648	0.959711	0.934242	0.899218	0.637684
	MMRF_2538	19004579814	151.175	0.990018	0.980824	0.963704	0.93667	0.899371	0.62466
	MMRF_2539	15587089995	126.513	0.987848	0.976303	0.954605	0.918628	0.867566	0.534007
	MMRF_2541	18591344398	146.025	0.989366	0.98133	0.96654	0.941791	0.905262	0.618865
	MMRF_2543	16867687820	137.967	0.988521	0.975911	0.952905	0.917798	0.871011	0.565687
	MMRF_2545	15300179822	120.787	0.988442	0.974846	0.94853	0.906584	0.849744	0.505993
	MMRF_2546	24154804866	188.19	0.991741	0.986231	0.976441	0.960801	0.938435	0.740635
	MMRF_2548	14822971915	117.362	0.98788	0.97317	0.944892	0.900181	0.84024	0.487819
	MMRF_2549	16941605504	134.307	0.988976	0.97986	0.962354	0.932838	0.88962	0.573003
	MMRF_2550	19571691251	154.51	0.989476	0.982397	0.970165	0.95013	0.920401	0.658446
	MMRF_2554	17228842903	132.38	0.989223	0.978019	0.956764	0.922864	0.876044	0.559238
	MMRF_2557	16110120195	127.455	0.989306	0.977852	0.955746	0.919971	0.870324	0.538248
	MMRF_2559	15848450365	126.671	0.988731	0.97541	0.949758	0.909551	0.855739	0.530695
	MMRF_2560	19982248868	156.716	0.990533	0.982817	0.969184	0.947457	0.916484	0.66026
	MMRF_2562	16015849982	128.183	0.989304	0.97784	0.955383	0.919346	0.869787	0.543166
	MMRF_2563	14451815458	115.586	0.987703	0.972465	0.943309	0.897049	0.835405	0.479485
	MMRF_2564	19385952969	153.46	0.989337	0.981743	0.96816	0.945749	0.912993	0.645177
	MMRF_2566	19018163614	147.899	0.990346	0.981854	0.966149	0.940749	0.904739	0.625706
	MMRF_2567	17699856581	143.106	0.989237	0.978581	0.958861	0.928069	0.886046	0.59176
	MMRF_2568	21996388230	172.895	0.991016	0.984161	0.971836	0.952168	0.924433	0.696618
	MMRF_2570	20589640324	163.192	0.989438	0.982289	0.969507	0.948642	0.918539	0.667489
	MMRF_2572	18780530962	154.852	0.988649	0.977576	0.958107	0.928995	0.890096	0.620976
	MMRF_2573	17867931746	143.419	0.988842	0.97814	0.959035	0.928935	0.887743	0.595061
	MMRF_2574	22378452974	176.708	0.991291	0.984881	0.973449	0.955367	0.929882	0.712041
	MMRF_2577	15815105598	125.465	0.989327	0.977413	0.954227	0.916572	0.865106	0.530915
	MMRF_2579	20331515831	158.771	0.990304	0.983104	0.970934	0.951727	0.923921	0.678518
	MMRF_2580	19561638176	160.636	0.988526	0.979799	0.964573	0.941001	0.907973	0.651599
	MMRF_2581	19733288683	158.087	0.989531	0.980547	0.964963	0.940511	0.906759	0.647735
	MMRF_2583	18280443993	147.515	0.988429	0.978351	0.960497	0.932429	0.893306	0.607158
	MMRF_2584	16342136491	133.464	0.986813	0.973852	0.950157	0.912865	0.862551	0.542507
	MMRF_2587	18982809606	151.39	0.988932	0.980637	0.965871	0.941602	0.906572	0.631226
	MMRF_2590	21390783256	170.787	0.989174	0.98204	0.970189	0.951377	0.924295	0.690982
	MMRF_2592	24138139491	189.665	0.990464	0.985342	0.976495	0.96228	0.941379	0.745501
	MMRF_2593	19183256838	150.873	0.990217	0.981407	0.96512	0.939075	0.902691	0.627085
	MMRF_2595	16469797164	132.802	0.988114	0.976644	0.954432	0.918195	0.867883	0.550227
	MMRF_2596	15743379458	127.046	0.988096	0.976402	0.953155	0.915126	0.862244	0.526834
	MMRF_2598	20266898249	158.899	0.989118	0.981358	0.967907	0.946189	0.914934	0.656257
	MMRF_2601	16895940427	139.271	0.987096	0.974817	0.953013	0.919348	0.873575	0.568568
	MMRF_2602	17203553978	140.301	0.988804	0.977245	0.956051	0.923395	0.879221	0.578476
	MMRF_2605	19448397235	155.353	0.989437	0.981749	0.967734	0.944732	0.911432	0.643152
	MMRF_2606	15747657581	130.184	0.987126	0.974266	0.950581	0.913009	0.861385	0.534355
	MMRF_2609	18349050800	147.345	0.989081	0.97819	0.95904	0.929283	0.889144	0.60533
	MMRF_2611	21895466111	173.09	0.990055	0.983925	0.973593	0.957094	0.933074	0.710496
	MMRF_2613	18450874787	147.39	0.987918	0.977566	0.959445	0.931218	0.892188	0.606364
	MMRF_2614	17672212574	140.569	0.989426	0.977885	0.955806	0.921678	0.875823	0.577014
	MMRF_2621	17563282814	141.125	0.988161	0.975934	0.954365	0.921033	0.876325	0.580929
	MMRF_2622	21706913474	172.582	0.99052	0.983051	0.970018	0.949532	0.921002	0.691039
	MMRF_2624	18746338259	148.891	0.989321	0.978899	0.96009	0.93094	0.891515	0.610893
	MMRF_2628	16371257965	132.845	0.987899	0.973346	0.946581	0.906496	0.854236	0.53872
	MMRF_2630	19417164494	157.785	0.98928	0.979703	0.963002	0.937469	0.902492	0.642534
	MMRF_2631	21222786590	170.675	0.990114	0.981964	0.968005	0.946427	0.916907	0.684078
	MMRF_2634	19623590478	156.661	0.989567	0.980105	0.963429	0.937675	0.902516	0.640285
	MMRF_2635	21322238337	168.434	0.989099	0.980205	0.96566	0.943578	0.913244	0.67639
	MMRF_2636	12610824383	99.1202	0.982345	0.95448	0.904255	0.832686	0.748014	0.375413
	MMRF_2638	15371789986	120.229	0.985954	0.967594	0.934446	0.885525	0.823139	0.48405
	MMRF_2639	20764307170	164.386	0.989782	0.980429	0.964216	0.939571	0.906329	0.659235
	MMRF_2640	23243597888	182.98	0.990442	0.982999	0.970302	0.950876	0.924486	0.714297
	MMRF_2641	20448722431	162.374	0.990044	0.980913	0.964496	0.93925	0.904918	0.65492
	MMRF_2642	16582923113	133.928	0.987338	0.97375	0.94798	0.908392	0.855752	0.548489
	MMRF_2643	21002993265	159.523	0.989657	0.97942	0.961207	0.933546	0.896412	0.63785
	MMRF_2644	22862052179	186.207	0.989537	0.979848	0.963442	0.939687	0.908962	0.697014
	MMRF_2647	20519797944	165.386	0.989775	0.980438	0.963773	0.938318	0.904279	0.65867
					RNAseq
	Samples	picardTools.alignmentStats.TOTAL_READS.PAIR	picardTools.rnaMetrics.PCT_MRNA_BASES	picardTools.rnaMetrics.PCT_CODING_BASES	picardTools.rnaMetrics.PCT_INTRONIC_BASES	picardTools.rnaMetrics.PCT_INTERGENIC_BASES	picardTools.rnaMetrics.PCT_RIBOSOMAL_BASES	picardTools.rnaMetrics.PCT_UTR_BASES
	MMRF_1016	#N/A	#N/A	#N/A	#N/A	#N/A	#N/A	#N/A
	MMRF_1020	#N/A	#N/A	#N/A	#N/A	#N/A	#N/A	#N/A
	MMRF_1021	207191278	0.952993	0.77229	0.025036	0.010312	0.011718	0.180704
	MMRF_1029	280891408	0.930973	0.737907	0.036667	0.01113	0.021372	0.193066
	MMRF_1030	178606072	0.916147	0.734461	0.020925	0.009611	0.053706	0.181687
	MMRF_1031	158897650	0.916741	0.729203	0.019208	0.028978	0.035293	0.187538
	MMRF_1032	117242528	0.918785	0.710487	0.031957	0.008652	0.041082	0.208299
	MMRF_1037	227647598	0.915307	0.741117	0.040319	0.009879	0.034684	0.17419
	MMRF_1038	210223912	0.932906	0.765736	0.024098	0.010545	0.032612	0.167169
	MMRF_1045	156690748	0.94933	0.712729	0.030339	0.012442	0.007935	0.2366
	MMRF_1048	160058682	0.911147	0.614936	0.061198	0.018041	0.009666	0.29621
	MMRF_1049	#N/A	#N/A	#N/A	#N/A	#N/A	#N/A	#N/A
	MMRF_1054	#N/A	#N/A	#N/A	#N/A	#N/A	#N/A	#N/A
	MMRF_1055	#N/A	#N/A	#N/A	#N/A	#N/A	#N/A	#N/A
	MMRF_1068	103301184	0.87226	0.649097	0.093951	0.028599	0.005229	0.223163
	MMRF_1073	200680160	0.896998	0.663124	0.072582	0.026423	0.004017	0.233874
	MMRF_1077	110510674	0.868676	0.626541	0.099228	0.027043	0.005088	0.242136
	MMRF_1082	130347110	0.833531	0.518947	0.120869	0.041056	0.004575	0.314584
	MMRF_1085	280433384	0.885905	0.672567	0.083563	0.021638	0.00893	0.213338
	MMRF_1086	133075680	0.890487	0.618913	0.077231	0.019123	0.013254	0.271574
	MMRF_1089	106625188	0.88936	0.664802	0.088162	0.017765	0.004739	0.224559
	MMRF_1090	#N/A	#N/A	#N/A	#N/A	#N/A	#N/A	#N/A
	MMRF_1092	129115760	0.887291	0.651836	0.083818	0.021002	0.007953	0.235455
	MMRF_1098	182634950	0.869414	0.576528	0.094402	0.025248	0.011	0.292886
	MMRF_1100	222220562	0.861776	0.623738	0.100798	0.023822	0.013715	0.238038
	MMRF_1107	143797178	0.884948	0.651393	0.08101	0.021308	0.012793	0.233555
	MMRF_1108	148191236	0.89238	0.651765	0.079114	0.019561	0.009005	0.240615
	MMRF_1112	224742890	0.906797	0.69649	0.063022	0.016615	0.013635	0.210307
	MMRF_1127	#N/A	#N/A	#N/A	#N/A	#N/A	#N/A	#N/A
	MMRF_1129	206582584	0.876794	0.613494	0.093561	0.025036	0.004637	0.263301
	MMRF_1131	242364468	0.894335	0.662094	0.06463	0.026288	0.014798	0.232241
	MMRF_1137	#N/A	#N/A	#N/A	#N/A	#N/A	#N/A	#N/A
	MMRF_1143	#N/A	#N/A	#N/A	#N/A	#N/A	#N/A	#N/A
	MMRF_1148	165235288	0.917529	0.717146	0.057148	0.019131	0.006229	0.200384
	MMRF_1151	189431784	0.856834	0.586482	0.109294	0.028041	0.005868	0.270352
	MMRF_1152	138687266	0.87529	0.601321	0.096432	0.021894	0.006416	0.27397
	MMRF_1153	125067898	0.891828	0.680345	0.080248	0.022144	0.005819	0.211483
	MMRF_1155	#N/A	#N/A	#N/A	#N/A	#N/A	#N/A	#N/A
	MMRF_1157	193192042	0.852664	0.602925	0.122357	0.022252	0.002745	0.249739
	MMRF_1164	161553206	0.882044	0.615299	0.096841	0.017487	0.003654	0.266745
	MMRF_1167	185207964	0.853699	0.549711	0.102866	0.034966	0.008522	0.303989
	MMRF_1169	230041214	0.868822	0.627268	0.094518	0.026436	0.010277	0.241554
	MMRF_1171	196542664	0.888373	0.667368	0.085472	0.020229	0.005966	0.221005
	MMRF_1178	158414342	0.903777	0.702569	0.064686	0.016718	0.014883	0.201208
	MMRF_1179	127866458	0.872567	0.646642	0.084347	0.02696	0.01621	0.225926
	MMRF_1180	213251838	0.854029	0.58288	0.116393	0.020341	0.009284	0.271149
	MMRF_1184	184662868	0.892242	0.671289	0.068836	0.023837	0.015172	0.220953
	MMRF_1185	165261746	0.915182	0.712632	0.062137	0.014289	0.008441	0.20255
	MMRF_1188	203918506	0.864803	0.63437	0.101441	0.018621	0.015205	0.230434
	MMRF_1189	236030092	0.878467	0.588959	0.095483	0.022436	0.003644	0.289508
	MMRF_1195	220905344	0.86952	0.604685	0.096364	0.030051	0.004101	0.264836
	MMRF_1202	177917992	0.891321	0.691473	0.075515	0.018746	0.014501	0.199848
	MMRF_1205	146054370	0.9125	0.678887	0.065286	0.018819	0.003421	0.233614
	MMRF_1216	227576602	0.885614	0.704016	0.073378	0.019315	0.021827	0.181597
	MMRF_1231	122973628	0.903149	0.703718	0.077358	0.015153	0.004384	0.199431
	MMRF_1232	218512020	0.861269	0.601503	0.110863	0.018059	0.009855	0.259766
	MMRF_1250	173177372	0.808777	0.608106	0.091481	0.021493	0.078769	0.200671
	MMRF_1251	196508454	0.822984	0.560301	0.114014	0.034164	0.029034	0.262682
	MMRF_1257	168488462	0.867702	0.643701	0.08264	0.022044	0.027764	0.224002
	MMRF_1267	152390374	0.91555	0.775627	0.038009	0.014114	0.032543	0.139923
	MMRF_1269	109005300	0.811575	0.573997	0.113651	0.028268	0.046968	0.237578
	MMRF_1270	230866026	0.718545	0.485742	0.120184	0.031896	0.13008	0.232803
	MMRF_1274	174153476	0.881146	0.64789	0.091675	0.022927	0.004279	0.233256
	MMRF_1283	#N/A	#N/A	#N/A	#N/A	#N/A	#N/A	#N/A
	MMRF_1284	183533940	0.880732	0.683418	0.074342	0.021275	0.023786	0.197314
	MMRF_1285	187028262	0.850613	0.563518	0.09019	0.028501	0.030875	0.287095
	MMRF_1286	210553468	0.854607	0.567434	0.112804	0.028351	0.004262	0.287173
	MMRF_1309	194655182	0.90795	0.702405	0.06191	0.021268	0.008927	0.205545
	MMRF_1311	218902076	0.806165	0.558163	0.124756	0.024822	0.044567	0.248001
	MMRF_1318	139848004	0.919739	0.719444	0.050602	0.013535	0.016185	0.200295
	MMRF_1323	193046792	0.888794	0.67367	0.073227	0.020479	0.017585	0.215124
	MMRF_1327	111248848	0.861163	0.606897	0.108596	0.016654	0.013717	0.254265
	MMRF_1328	241137520	0.636011	0.371924	0.238657	0.081018	0.046343	0.264087
	MMRF_1331	205906512	0.890433	0.689283	0.079461	0.015588	0.014611	0.20115
	MMRF_1332	233067260	0.350068	0.17116	0.33785	0.069852	0.249737	0.178908
	MMRF_1338	176529700	0.856137	0.602139	0.078463	0.018959	0.046748	0.253998
	MMRF_1339	#N/A	#N/A	#N/A	#N/A	#N/A	#N/A	#N/A
	MMRF_1342	138048960	0.8883	0.662017	0.07084	0.021136	0.019854	0.226283
	MMRF_1344	159066600	0.845613	0.575399	0.095146	0.022956	0.036502	0.270214
	MMRF_1348	188869954	0.910303	0.674617	0.061198	0.018682	0.009876	0.235686
	MMRF_1349	159763620	0.892401	0.696274	0.06424	0.023451	0.020029	0.196126
	MMRF_1352	154681790	0.813243	0.576444	0.08654	0.019554	0.081054	0.236799
	MMRF_1354	151048748	0.826384	0.582147	0.073214	0.087755	0.012721	0.244237
	MMRF_1355	113026644	0.877226	0.674689	0.071806	0.029353	0.021708	0.202537
	MMRF_1356	176725180	0.888089	0.668027	0.081773	0.020397	0.009794	0.220061
	MMRF_1358	174375244	0.916009	0.722258	0.057864	0.013582	0.012625	0.193751
	MMRF_1360	893979782	0.901744	0.70505	0.076558	0.014174	0.007561	0.196694
	MMRF_1361	286230162	0.861017	0.618343	0.106382	0.027512	0.005114	0.242674
	MMRF_1365	81013930	0.89273	0.651409	0.083023	0.017395	0.006897	0.241321
	MMRF_1371	107155766	0.847169	0.644297	0.070642	0.070576	0.011673	0.202872
	MMRF_1377	85025512	0.851059	0.577039	0.10972	0.032092	0.007165	0.27402
	MMRF_1380	110755956	0.925135	0.703943	0.055099	0.012519	0.007288	0.221192
	MMRF_1383	162017548	0.923164	0.713672	0.057264	0.013584	0.006014	0.209492
	MMRF_1386	158076966	0.857791	0.654904	0.075404	0.059904	0.006937	0.202887
	MMRF_1388	272676214	0.865049	0.610288	0.096075	0.031186	0.007743	0.25476
	MMRF_1389	153814534	0.875201	0.596574	0.093644	0.026355	0.004827	0.278628
	MMRF_1393	114523454	0.88509	0.675723	0.064289	0.013325	0.037523	0.209367
	MMRF_1395	223946618	0.893369	0.696744	0.076521	0.021176	0.008986	0.196624
	MMRF_1401	144214556	0.841719	0.572385	0.123029	0.021481	0.013831	0.269334
	MMRF_1407	#N/A	#N/A	#N/A	#N/A	#N/A	#N/A	#N/A
	MMRF_1408	166148396	0.828292	0.565143	0.124769	0.03668	0.010327	0.263149
	MMRF_1413	163268596	0.896845	0.692747	0.061196	0.019297	0.022778	0.204098
	MMRF_1423	205303278	0.911171	0.73236	0.049333	0.016108	0.023484	0.178811
	MMRF_1424	164903120	0.914802	0.634812	0.061538	0.019499	0.004193	0.27999
	MMRF_1425	170512644	0.903905	0.690021	0.073438	0.018221	0.004471	0.213884
	MMRF_1426	181730204	0.826687	0.619112	0.085639	0.023675	0.064594	0.207575
	MMRF_1431	#N/A	#N/A	#N/A	#N/A	#N/A	#N/A	#N/A
	MMRF_1432	172860732	0.842914	0.558447	0.091065	0.021241	0.04506	0.284467
	MMRF_1433	197880410	0.881309	0.666123	0.069397	0.020188	0.029312	0.215185
	MMRF_1434	198855830	0.870876	0.590903	0.08265	0.019102	0.027602	0.279974
	MMRF_1436	188031880	0.881793	0.693381	0.064038	0.014378	0.04001	0.188412
	MMRF_1439	152553404	0.838592	0.564328	0.077086	0.02176	0.062976	0.274264
	MMRF_1445	199098916	0.879521	0.655534	0.099967	0.015709	0.004845	0.223986
	MMRF_1446	166857808	0.881599	0.618525	0.090928	0.021431	0.006103	0.263074
	MMRF_1447	215485258	0.87997	0.626306	0.092987	0.0225	0.004586	0.253664
	MMRF_1450	175676908	0.879302	0.607751	0.087414	0.024781	0.008568	0.271551
	MMRF_1451	151562004	0.879593	0.624467	0.097644	0.018483	0.004311	0.255125
	MMRF_1453	188283146	0.912371	0.641939	0.059028	0.016473	0.012207	0.270432
	MMRF_1454	180897056	0.9096	0.684256	0.074	0.013153	0.003272	0.225343
	MMRF_1460	186741700	0.91661	0.715284	0.062201	0.017872	0.003348	0.201325
	MMRF_1461	177393978	0.890437	0.609189	0.079602	0.022812	0.007186	0.281248
	MMRF_1466	185196882	0.883846	0.622531	0.087199	0.021755	0.007268	0.261315
	MMRF_1474	186091534	0.904126	0.676986	0.073725	0.017193	0.004979	0.22714
	MMRF_1484	228973516	0.88032	0.592837	0.093158	0.022742	0.003802	0.287484
	MMRF_1485	141914040	0.842658	0.588679	0.117158	0.026264	0.013998	0.253979
	MMRF_1486	#N/A	#N/A	#N/A	#N/A	#N/A	#N/A	#N/A
	MMRF_1489	154487568	0.873109	0.622062	0.098032	0.024807	0.004073	0.251047
	MMRF_1491	249723502	0.871254	0.632558	0.109673	0.014716	0.004388	0.238696
	MMRF_1496	456964224	0.897636	0.632899	0.081493	0.018563	0.002319	0.264737
	MMRF_1497	148611554	0.911691	0.709916	0.06366	0.011181	0.01355	0.201775
	MMRF_1499	226632250	0.873469	0.638787	0.095097	0.026045	0.005429	0.234682
	MMRF_1500	#N/A	#N/A	#N/A	#N/A	#N/A	#N/A	#N/A
	MMRF_1501	204825838	0.86973	0.618411	0.102118	0.023091	0.0051	0.25132
	MMRF_1502	189920052	0.860681	0.568994	0.100393	0.028219	0.010763	0.291686
	MMRF_1505	#N/A	#N/A	#N/A	#N/A	#N/A	#N/A	#N/A
	MMRF_1506	187082140	0.90075	0.690175	0.063842	0.019369	0.016124	0.210575
	MMRF_1511	163667972	0.905661	0.681711	0.060917	0.01832	0.015178	0.223951
	MMRF_1516	153946356	0.871058	0.608945	0.101823	0.022173	0.004977	0.262113
	MMRF_1518	159703486	0.879396	0.598885	0.090425	0.025294	0.00492	0.280512
	MMRF_1519	165461266	0.893226	0.662317	0.071274	0.021065	0.014527	0.230909
	MMRF_1520	194549800	0.908579	0.717799	0.065685	0.0163	0.009509	0.190779
	MMRF_1522	193604532	0.900415	0.680829	0.076577	0.017086	0.005952	0.219585
	MMRF_1523	220332808	0.901057	0.675418	0.071793	0.022555	0.00464	0.225639
	MMRF_1525	#N/A	#N/A	#N/A	#N/A	#N/A	#N/A	#N/A
	MMRF_1531	191237918	0.883058	0.648361	0.09563	0.015939	0.005401	0.234697
	MMRF_1533	#N/A	#N/A	#N/A	#N/A	#N/A	#N/A	#N/A
	MMRF_1534	225006814	0.870219	0.583492	0.100811	0.024874	0.004114	0.286728
	MMRF_1535	#N/A	#N/A	#N/A	#N/A	#N/A	#N/A	#N/A
	MMRF_1538	212097944	0.92275	0.719466	0.058599	0.014004	0.004675	0.203284
	MMRF_1539	197789540	0.875821	0.594415	0.098085	0.021394	0.004723	0.281406
	MMRF_1540	261753122	0.899034	0.6809	0.064322	0.019113	0.017601	0.218134
	MMRF_1541	177376018	0.878747	0.664068	0.086813	0.019097	0.015509	0.214679
	MMRF_1542	197613852	0.898997	0.64306	0.072574	0.023998	0.004452	0.255937
	MMRF_1543	147848028	0.892802	0.647361	0.083537	0.017865	0.005828	0.245441
	MMRF_1546	214589552	0.819099	0.560255	0.12559	0.052036	0.003295	0.258845
	MMRF_1547	#N/A	#N/A	#N/A	#N/A	#N/A	#N/A	#N/A
	MMRF_1550	268501786	0.877879	0.61628	0.094904	0.021012	0.006236	0.261599
	MMRF_1555	#N/A	#N/A	#N/A	#N/A	#N/A	#N/A	#N/A
	MMRF_1556	254806320	0.89332	0.624986	0.081675	0.018854	0.006184	0.268334
	MMRF_1560	224926634	0.90097	0.680884	0.057879	0.018296	0.022943	0.220086
	MMRF_1564	#N/A	#N/A	#N/A	#N/A	#N/A	#N/A	#N/A
	MMRF_1565	222649494	0.857667	0.566665	0.114618	0.024806	0.00293	0.291002
	MMRF_1568	#N/A	#N/A	#N/A	#N/A	#N/A	#N/A	#N/A
	MMRF_1569	#N/A	#N/A	#N/A	#N/A	#N/A	#N/A	#N/A
	MMRF_1570	233520446	0.89661	0.699398	0.062436	0.033658	0.007331	0.197212
	MMRF_1572	221553164	0.903621	0.683185	0.073137	0.020556	0.002698	0.220436
	MMRF_1573	293416190	0.899121	0.70175	0.080252	0.012221	0.008443	0.197372
	MMRF_1574	236498982	0.926613	0.73326	0.047047	0.017593	0.008786	0.193352
	MMRF_1576	#N/A	#N/A	#N/A	#N/A	#N/A	#N/A	#N/A
	MMRF_1577	237469840	0.92165	0.713401	0.056956	0.014138	0.00729	0.20825
	MMRF_1579	209064814	0.910873	0.702107	0.067523	0.016358	0.005271	0.208767
	MMRF_1580	218227514	0.866387	0.607583	0.099501	0.029502	0.004632	0.258804
	MMRF_1583	194374602	0.876388	0.569429	0.097602	0.021266	0.004765	0.30696
	MMRF_1586	220107976	0.874754	0.619527	0.081663	0.033214	0.01041	0.255227
	MMRF_1587	191527370	0.827885	0.563615	0.132465	0.031679	0.008013	0.26427
	MMRF_1588	163316634	0.90859	0.714344	0.072493	0.014981	0.003973	0.194245
	MMRF_1589	268219222	0.888027	0.611043	0.086193	0.01792	0.007895	0.276985
	MMRF_1593	305400404	0.924177	0.694644	0.055973	0.016128	0.003738	0.229533
	MMRF_1595	276777858	0.916256	0.647214	0.059575	0.018271	0.005925	0.269042
	MMRF_1596	214588528	0.870412	0.619998	0.095418	0.024865	0.009352	0.250413
	MMRF_1597	156536618	0.859936	0.564987	0.108005	0.029671	0.002403	0.294949
	MMRF_1598	177056652	0.879526	0.598741	0.094323	0.022339	0.003835	0.280785
	MMRF_1601	#N/A	#N/A	#N/A	#N/A	#N/A	#N/A	#N/A
	MMRF_1603	246130716	0.923695	0.703471	0.060814	0.013181	0.002321	0.220224
	MMRF_1605	232938784	0.909724	0.713206	0.057331	0.022599	0.010383	0.196519
	MMRF_1607	#N/A	#N/A	#N/A	#N/A	#N/A	#N/A	#N/A
	MMRF_1608	#N/A	#N/A	#N/A	#N/A	#N/A	#N/A	#N/A
	MMRF_1610	#N/A	#N/A	#N/A	#N/A	#N/A	#N/A	#N/A
	MMRF_1613	165303548	0.89215	0.681193	0.084729	0.019776	0.003366	0.210957
	MMRF_1614	125840762	0.897163	0.669842	0.07734	0.018376	0.007167	0.227321
	MMRF_1617	119551752	0.870222	0.610003	0.099879	0.024787	0.005141	0.260218
	MMRF_1618	114438400	0.848615	0.599531	0.09001	0.057494	0.003905	0.249084
	MMRF_1621	160025558	0.890801	0.675736	0.084985	0.019164	0.005079	0.215065
	MMRF_1622	#N/A	#N/A	#N/A	#N/A	#N/A	#N/A	#N/A
	MMRF_1624	210552736	0.836413	0.559436	0.12836	0.027396	0.007911	0.276977
	MMRF_1625	142436850	0.924853	0.734738	0.055163	0.015797	0.004215	0.190115
	MMRF_1627	185304140	0.888803	0.636631	0.078538	0.018733	0.014042	0.252172
	MMRF_1628	#N/A	#N/A	#N/A	#N/A	#N/A	#N/A	#N/A
	MMRF_1629	#N/A	#N/A	#N/A	#N/A	#N/A	#N/A	#N/A
	MMRF_1630	205113934	0.84767	0.600568	0.122003	0.02231	0.008091	0.247101
	MMRF_1633	151734546	0.830222	0.523259	0.131946	0.03104	0.006853	0.306962
	MMRF_1634	121249052	0.889865	0.669067	0.073349	0.017586	0.019299	0.220799
	MMRF_1637	135098714	0.87793	0.621128	0.080599	0.03214	0.009412	0.256802
	MMRF_1638	#N/A	#N/A	#N/A	#N/A	#N/A	#N/A	#N/A
	MMRF_1639	97620056	0.881597	0.64658	0.078269	0.022462	0.017826	0.235017
	MMRF_1640	156679824	0.867567	0.641666	0.095288	0.019902	0.017437	0.225901
	MMRF_1641	165551982	0.881872	0.6918	0.078015	0.016806	0.023564	0.190072
	MMRF_1642	#N/A	#N/A	#N/A	#N/A	#N/A	#N/A	#N/A
	MMRF_1643	152524182	0.89662	0.670235	0.069683	0.021015	0.012805	0.226385
	MMRF_1644	152579338	0.891384	0.637321	0.083908	0.020498	0.00425	0.254063
	MMRF_1645	254487662	0.890712	0.635788	0.08864	0.016934	0.003742	0.254924
	MMRF_1646	#N/A	#N/A	#N/A	#N/A	#N/A	#N/A	#N/A
	MMRF_1647	#N/A	#N/A	#N/A	#N/A	#N/A	#N/A	#N/A
	MMRF_1650	#N/A	#N/A	#N/A	#N/A	#N/A	#N/A	#N/A
	MMRF_1651	149055884	0.919101	0.728002	0.058972	0.016617	0.005359	0.191099
	MMRF_1652	139215380	0.899596	0.677893	0.075424	0.020363	0.004657	0.221704
	MMRF_1654	175772268	0.858109	0.601403	0.106694	0.031164	0.004065	0.256706
	MMRF_1655	#N/A	#N/A	#N/A	#N/A	#N/A	#N/A	#N/A
	MMRF_1656	153001642	0.885837	0.647305	0.083342	0.018814	0.012097	0.238531
	MMRF_1659	215633612	0.882118	0.641214	0.094106	0.018931	0.004881	0.240904
	MMRF_1662	#N/A	#N/A	#N/A	#N/A	#N/A	#N/A	#N/A
	MMRF_1664	165408558	0.869394	0.655501	0.088882	0.024399	0.017442	0.213894
	MMRF_1665	144487778	0.871459	0.646402	0.106992	0.017293	0.004294	0.225057
	MMRF_1667	#N/A	#N/A	#N/A	#N/A	#N/A	#N/A	#N/A
	MMRF_1668	165001792	0.876173	0.611711	0.096827	0.022544	0.004501	0.264462
	MMRF_1670	198415132	0.914449	0.640927	0.058019	0.016617	0.011038	0.273522
	MMRF_1671	#N/A	#N/A	#N/A	#N/A	#N/A	#N/A	#N/A
	MMRF_1672	182905962	0.917637	0.678315	0.05152	0.013063	0.017973	0.239322
	MMRF_1676	#N/A	#N/A	#N/A	#N/A	#N/A	#N/A	#N/A
	MMRF_1677	201062746	0.91097	0.698987	0.067501	0.018122	0.003427	0.211984
	MMRF_1678	153965884	0.938096	0.733136	0.032349	0.011512	0.018191	0.20496
	MMRF_1680	#N/A	#N/A	#N/A	#N/A	#N/A	#N/A	#N/A
	MMRF_1682	164951362	0.896625	0.672128	0.076296	0.021933	0.005185	0.224496
	MMRF_1683	208406582	0.922632	0.709321	0.058334	0.014867	0.004191	0.213312
	MMRF_1686	124022820	0.935116	0.739003	0.045773	0.011166	0.008021	0.196113
	MMRF_1687	#N/A	#N/A	#N/A	#N/A	#N/A	#N/A	#N/A
	MMRF_1689	251510042	0.905053	0.634071	0.066611	0.023943	0.004426	0.270982
	MMRF_1690	175747092	0.901681	0.665612	0.069312	0.015794	0.013312	0.236069
	MMRF_1695	213341074	0.927851	0.697127	0.052004	0.01412	0.00606	0.230723
	MMRF_1698	203374640	0.95101	0.781793	0.037505	0.006332	0.0052	0.169218
	MMRF_1700	205215128	0.901781	0.708467	0.071424	0.022924	0.00389	0.193314
	MMRF_1703	#N/A	#N/A	#N/A	#N/A	#N/A	#N/A	#N/A
	MMRF_1705	119317600	0.644442	0.368719	0.282242	0.057409	0.016515	0.275723
	MMRF_1706	#N/A	#N/A	#N/A	#N/A	#N/A	#N/A	#N/A
	MMRF_1710	225725382	0.878122	0.641162	0.09692	0.019907	0.005081	0.23696
	MMRF_1713	196225332	0.869251	0.639375	0.076588	0.04763	0.006583	0.229876
	MMRF_1714	196408294	0.91602	0.688768	0.061648	0.0151	0.007281	0.227252
	MMRF_1715	197598104	0.876095	0.63954	0.103688	0.017267	0.002973	0.236555
	MMRF_1716	172170502	0.909575	0.708755	0.029984	0.010168	0.050645	0.20082
	MMRF_1717	#N/A	#N/A	#N/A	#N/A	#N/A	#N/A	#N/A
	MMRF_1718	264427132	0.880658	0.661552	0.095291	0.021125	0.002947	0.219106
	MMRF_1719	251862850	0.824209	0.540089	0.14056	0.03102	0.004252	0.28412
	MMRF_1720	236270302	0.902265	0.676956	0.070753	0.022079	0.00494	0.225309
	MMRF_1721	186541730	0.910703	0.675076	0.057325	0.018457	0.013589	0.235627
	MMRF_1722	197467712	0.908395	0.67225	0.056778	0.019267	0.015651	0.236145
	MMRF_1723	#N/A	#N/A	#N/A	#N/A	#N/A	#N/A	#N/A
	MMRF_1725	#N/A	#N/A	#N/A	#N/A	#N/A	#N/A	#N/A
	MMRF_1726	237030386	0.913825	0.69016	0.062728	0.016518	0.006989	0.223664
	MMRF_1727	216528598	0.90595	0.643354	0.069287	0.021036	0.003746	0.262596
	MMRF_1730	221609586	0.910207	0.717719	0.066948	0.016562	0.006328	0.192488
	MMRF_1731	201105512	0.920951	0.669082	0.059597	0.012731	0.006775	0.251868
	MMRF_1733	257413296	0.919406	0.726146	0.05781	0.012827	0.010058	0.19326
	MMRF_1735	231954208	0.906479	0.722394	0.059767	0.026507	0.007298	0.184086
	MMRF_1736	225701794	0.862891	0.600214	0.10332	0.029623	0.00421	0.262677
	MMRF_1738	261024004	0.948096	0.713682	0.023469	0.020344	0.00813	0.234413
	MMRF_1739	184411954	0.905891	0.687783	0.075045	0.015348	0.003742	0.218108
	MMRF_1740	#N/A	#N/A	#N/A	#N/A	#N/A	#N/A	#N/A
	MMRF_1744	195261884	0.900687	0.675358	0.077431	0.017868	0.004038	0.225329
	MMRF_1746	#N/A	#N/A	#N/A	#N/A	#N/A	#N/A	#N/A
	MMRF_1749	#N/A	#N/A	#N/A	#N/A	#N/A	#N/A	#N/A
	MMRF_1750	215437120	0.924371	0.757143	0.042927	0.018004	0.01484	0.167228
	MMRF_1753	#N/A	#N/A	#N/A	#N/A	#N/A	#N/A	#N/A
	MMRF_1755	205538044	0.869189	0.575837	0.097369	0.025692	0.007785	0.293352
	MMRF_1758	196544582	0.887252	0.628544	0.087888	0.020218	0.004673	0.258709
	MMRF_1759	192156668	0.894819	0.696312	0.083886	0.015172	0.006164	0.198506
	MMRF_1760	#N/A	#N/A	#N/A	#N/A	#N/A	#N/A	#N/A
	MMRF_1761	#N/A	#N/A	#N/A	#N/A	#N/A	#N/A	#N/A
	MMRF_1763	#N/A	#N/A	#N/A	#N/A	#N/A	#N/A	#N/A
	MMRF_1766	234989894	0.822252	0.551053	0.131968	0.042096	0.003706	0.271199
	MMRF_1768	217857626	0.893972	0.65202	0.077117	0.020942	0.008043	0.241951
	MMRF_1773	217301418	0.897142	0.643515	0.076426	0.018405	0.008101	0.253627
	MMRF_1774	#N/A	#N/A	#N/A	#N/A	#N/A	#N/A	#N/A
	MMRF_1775	190220162	0.929656	0.751478	0.049567	0.012618	0.008226	0.178179
	MMRF_1777	202587664	0.94185	0.752118	0.036952	0.015266	0.005978	0.189732
	MMRF_1778	231154590	0.83009	0.562988	0.121901	0.045332	0.002698	0.267102
	MMRF_1780	242427126	0.867731	0.602977	0.095206	0.03498	0.0021	0.264754
	MMRF_1781	#N/A	#N/A	#N/A	#N/A	#N/A	#N/A	#N/A
	MMRF_1782	203888314	0.91112	0.678963	0.0622	0.021778	0.004946	0.232157
	MMRF_1783	201033584	0.919485	0.729288	0.056258	0.014464	0.009831	0.190197
	MMRF_1784	#N/A	#N/A	#N/A	#N/A	#N/A	#N/A	#N/A
	MMRF_1786	200607564	0.898313	0.707343	0.081368	0.016081	0.004257	0.190971
	MMRF_1787	221180664	0.888768	0.682048	0.079167	0.023618	0.008512	0.20672
	MMRF_1790	254573230	0.875976	0.612268	0.100738	0.01832	0.004991	0.263708
	MMRF_1792	184966746	0.89589	0.691113	0.080883	0.017158	0.006125	0.204777
	MMRF_1793	196785562	0.928065	0.749453	0.050348	0.013086	0.008578	0.178612
	MMRF_1794	#N/A	#N/A	#N/A	#N/A	#N/A	#N/A	#N/A
	MMRF_1795	255324386	0.854035	0.643476	0.097292	0.043434	0.005282	0.210559
	MMRF_1796	221404658	0.923003	0.681069	0.053682	0.020037	0.003304	0.241935
	MMRF_1797	234848626	0.84594	0.629612	0.116356	0.030339	0.007424	0.216327
	MMRF_1801	193758198	0.881594	0.655428	0.091034	0.02447	0.002916	0.226167
	MMRF_1802	209361032	0.901203	0.700844	0.073785	0.019544	0.005511	0.200359
	MMRF_1803	#N/A	#N/A	#N/A	#N/A	#N/A	#N/A	#N/A
	MMRF_1807	190675800	0.908161	0.724709	0.072353	0.015469	0.004038	0.183452
	MMRF_1808	177331758	0.890425	0.690884	0.0875	0.015699	0.006422	0.199541
	MMRF_1810	228325214	0.893724	0.665819	0.07958	0.02026	0.006481	0.227905
	MMRF_1814	226144136	0.871324	0.617803	0.09422	0.028083	0.006409	0.25352
	MMRF_1815	218300624	0.854781	0.61229	0.114885	0.026288	0.004078	0.242491
	MMRF_1816	#N/A	#N/A	#N/A	#N/A	#N/A	#N/A	#N/A
	MMRF_1819	202852696	0.915957	0.737992	0.065687	0.014156	0.004219	0.177965
	MMRF_1820	#N/A	#N/A	#N/A	#N/A	#N/A	#N/A	#N/A
	MMRF_1822	123866016	0.870126	0.606405	0.092015	0.031511	0.006413	0.263721
	MMRF_1824	131777896	0.951376	0.736407	0.032406	0.011389	0.004852	0.214969
	MMRF_1825	206964706	0.892609	0.698683	0.075059	0.020511	0.011914	0.193926
	MMRF_1830	217045260	0.872135	0.627895	0.104108	0.020359	0.003425	0.24424
	MMRF_1831	214491718	0.877634	0.662904	0.097897	0.018383	0.006127	0.21473
	MMRF_1832	200964436	0.9103	0.628036	0.073164	0.012628	0.003926	0.282264
	MMRF_1833	210960072	0.847088	0.597332	0.126548	0.021915	0.004484	0.249756
	MMRF_1834	#N/A	#N/A	#N/A	#N/A	#N/A	#N/A	#N/A
	MMRF_1835	213047576	0.875288	0.682075	0.10076	0.020371	0.003597	0.193213
	MMRF_1838	#N/A	#N/A	#N/A	#N/A	#N/A	#N/A	#N/A
	MMRF_1839	188451496	0.897111	0.688587	0.083507	0.017377	0.002026	0.208524
	MMRF_1841	#N/A	#N/A	#N/A	#N/A	#N/A	#N/A	#N/A
	MMRF_1842	192002820	0.887513	0.645536	0.088017	0.020957	0.003537	0.241977
	MMRF_1846	197091912	0.889611	0.643668	0.084201	0.020914	0.005311	0.245944
	MMRF_1847	174120472	0.880644	0.646067	0.094401	0.021872	0.003106	0.234577
	MMRF_1850	194743050	0.872587	0.627126	0.099461	0.024636	0.003342	0.245461
	MMRF_1851	225540444	0.873107	0.613892	0.098307	0.026645	0.00195	0.259215
	MMRF_1855	166483570	0.84203	0.566498	0.11171	0.034801	0.011544	0.275532
	MMRF_1856	187317126	0.900164	0.696848	0.0749	0.015068	0.009943	0.203316
	MMRF_1857	182706642	0.893654	0.687403	0.080569	0.016302	0.009556	0.206251
	MMRF_1858	#N/A	#N/A	#N/A	#N/A	#N/A	#N/A	#N/A
	MMRF_1859	187039342	0.855415	0.61008	0.092823	0.02306	0.0289	0.245335
	MMRF_1860	172226346	0.912367	0.720913	0.060596	0.013249	0.013902	0.191454
	MMRF_1861	211328346	0.862584	0.632019	0.104801	0.023192	0.009475	0.230565
	MMRF_1862	238292210	0.89273	0.619684	0.085559	0.015106	0.006638	0.273046
	MMRF_1865	173658656	0.903643	0.69196	0.071127	0.015185	0.010115	0.211684
	MMRF_1866	#N/A	#N/A	#N/A	#N/A	#N/A	#N/A	#N/A
	MMRF_1867	197426410	0.900903	0.683978	0.072645	0.017619	0.008908	0.216925
	MMRF_1871	192413724	0.898975	0.677279	0.0781	0.017441	0.005525	0.221696
	MMRF_1873	#N/A	#N/A	#N/A	#N/A	#N/A	#N/A	#N/A
	MMRF_1876	190513082	0.866837	0.647662	0.077697	0.046127	0.009409	0.219175
	MMRF_1879	178069454	0.853136	0.5972	0.12075	0.022036	0.004108	0.255936
	MMRF_1880	157159492	0.898548	0.683453	0.082503	0.017022	0.001939	0.215094
	MMRF_1881	149574480	0.893762	0.688189	0.081345	0.016187	0.008774	0.205573
	MMRF_1882	158140978	0.893872	0.685475	0.084638	0.01389	0.007662	0.208398
	MMRF_1886	137789988	0.829238	0.553127	0.131819	0.032987	0.005999	0.276111
	MMRF_1888	229456490	0.863337	0.633028	0.082794	0.049049	0.004847	0.230309
	MMRF_1889	229681860	0.898827	0.682341	0.081438	0.016737	0.003012	0.216486
	MMRF_1890	184521130	0.844371	0.576777	0.11563	0.032988	0.007055	0.267593
	MMRF_1891	235274092	0.939672	0.729529	0.041756	0.012439	0.006163	0.210143
	MMRF_1893	171901504	0.869352	0.62125	0.102324	0.023587	0.004773	0.248102
	MMRF_1895	119223370	0.879692	0.656281	0.083867	0.033811	0.002652	0.223411
	MMRF_1897	206205274	0.877249	0.634953	0.09374	0.017805	0.011288	0.242295
	MMRF_1900	195994690	0.871868	0.662531	0.087699	0.029588	0.010932	0.209337
	MMRF_1906	221388694	0.860488	0.631854	0.107249	0.028729	0.003567	0.228634
	MMRF_1908	178499360	0.847435	0.594226	0.127868	0.022325	0.002387	0.253208
	MMRF_1910	234664752	0.869736	0.637616	0.086178	0.033428	0.010718	0.232119
	MMRF_1911	224699008	0.91024	0.645244	0.06455	0.016015	0.009243	0.264996
	MMRF_1912	#N/A	#N/A	#N/A	#N/A	#N/A	#N/A	#N/A
	MMRF_1915	233322380	0.859784	0.574103	0.108423	0.020549	0.011301	0.285681
	MMRF_1916	267686468	0.916633	0.651212	0.059538	0.018197	0.005659	0.265421
	MMRF_1917	145543778	0.895423	0.680382	0.087394	0.013703	0.003526	0.215042
	MMRF_1918	206972472	0.873474	0.641019	0.09484	0.029149	0.002552	0.232455
	MMRF_1921	153670288	0.924052	0.727107	0.055455	0.013378	0.007174	0.196945
	MMRF_1922	127360356	0.845792	0.575734	0.109764	0.029265	0.01531	0.270058
	MMRF_1923	228458766	0.851196	0.582698	0.122877	0.021624	0.004331	0.268498
	MMRF_1927	156222954	0.894404	0.658049	0.081493	0.020062	0.004073	0.236355
	MMRF_1928	209708308	0.882772	0.637942	0.095485	0.018728	0.00303	0.24483
	MMRF_1929	#N/A	#N/A	#N/A	#N/A	#N/A	#N/A	#N/A
	MMRF_1930	#N/A	#N/A	#N/A	#N/A	#N/A	#N/A	#N/A
	MMRF_1931	243132480	0.869746	0.625248	0.093464	0.024456	0.012389	0.244498
	MMRF_1932	181033220	0.841524	0.561831	0.122224	0.031816	0.004458	0.279693
	MMRF_1939	#N/A	#N/A	#N/A	#N/A	#N/A	#N/A	#N/A
	MMRF_1940	#N/A	#N/A	#N/A	#N/A	#N/A	#N/A	#N/A
	MMRF_1945	#N/A	#N/A	#N/A	#N/A	#N/A	#N/A	#N/A
	MMRF_1953	#N/A	#N/A	#N/A	#N/A	#N/A	#N/A	#N/A
	MMRF_1955	#N/A	#N/A	#N/A	#N/A	#N/A	#N/A	#N/A
	MMRF_1957	#N/A	#N/A	#N/A	#N/A	#N/A	#N/A	#N/A
	MMRF_1963	185710446	0.918107	0.709216	0.0587	0.015386	0.00786	0.20889
	MMRF_1965	383154880	0.518586	0.283005	0.316632	0.082713	0.08835	0.235582
	MMRF_1967	196635498	0.884201	0.668009	0.085603	0.019241	0.011003	0.216193
	MMRF_1970	#N/A	#N/A	#N/A	#N/A	#N/A	#N/A	#N/A
	MMRF_1971	250925868	0.862546	0.599436	0.110052	0.024748	0.002668	0.263111
	MMRF_1972	206225684	0.850744	0.587466	0.111677	0.035249	0.002341	0.263278
	MMRF_1974	197100192	0.904855	0.686569	0.068733	0.019087	0.007361	0.218286
	MMRF_1977	169156256	0.834035	0.538161	0.117866	0.044844	0.003271	0.295874
	MMRF_1978	222339742	0.901207	0.694847	0.078657	0.015333	0.004827	0.20636
	MMRF_1981	191992906	0.854915	0.586582	0.113178	0.028517	0.00341	0.268333
	MMRF_1982	246234462	0.895117	0.706073	0.054067	0.042041	0.008825	0.189044
	MMRF_1985	190801990	0.856444	0.605944	0.108893	0.023975	0.010745	0.250499
	MMRF_1986	#N/A	#N/A	#N/A	#N/A	#N/A	#N/A	#N/A
	MMRF_1991	214984410	0.884134	0.652433	0.081374	0.023812	0.01073	0.231701
	MMRF_1992	185123930	0.890267	0.65339	0.08889	0.018191	0.002667	0.236877
	MMRF_1994	#N/A	#N/A	#N/A	#N/A	#N/A	#N/A	#N/A
	MMRF_1995	245249878	0.955831	0.687167	0.027457	0.010718	0.00604	0.268664
	MMRF_1997	234308936	0.843715	0.604274	0.117952	0.035112	0.003241	0.23944
	MMRF_1998	131276998	0.808856	0.55194	0.152546	0.035282	0.003337	0.256916
	MMRF_1999	#N/A	#N/A	#N/A	#N/A	#N/A	#N/A	#N/A
	MMRF_2000	240359654	0.908407	0.712892	0.076207	0.012893	0.00251	0.195514
	MMRF_2001	189651660	0.900152	0.70708	0.079672	0.015634	0.004576	0.193071
	MMRF_2002	210025454	0.855574	0.630277	0.069241	0.060733	0.014567	0.225297
	MMRF_2005	146724148	0.864404	0.631346	0.109521	0.023294	0.002798	0.233058
	MMRF_2006	215045578	0.892859	0.713729	0.08641	0.016971	0.003784	0.17913
	MMRF_2007	#N/A	#N/A	#N/A	#N/A	#N/A	#N/A	#N/A
	MMRF_2012	212687820	0.857059	0.597595	0.084866	0.0329	0.02531	0.259464
	MMRF_2013	204819550	0.936266	0.706767	0.045025	0.01266	0.00608	0.229499
	MMRF_2014	#N/A	#N/A	#N/A	#N/A	#N/A	#N/A	#N/A
	MMRF_2015	215714102	0.838235	0.568255	0.14241	0.01662	0.002751	0.26998
	MMRF_2016	206711038	0.866987	0.59732	0.11037	0.017202	0.005464	0.269666
	MMRF_2017	227527468	0.924447	0.681588	0.053143	0.01662	0.005812	0.242859
	MMRF_2018	220019306	0.872747	0.632551	0.096493	0.025657	0.005139	0.240196
	MMRF_2019	202731050	0.89689	0.689905	0.081646	0.015661	0.005833	0.206985
	MMRF_2021	#N/A	#N/A	#N/A	#N/A	#N/A	#N/A	#N/A
	MMRF_2024	#N/A	#N/A	#N/A	#N/A	#N/A	#N/A	#N/A
	MMRF_2026	206958162	0.86917	0.6739	0.106456	0.019846	0.004554	0.195269
	MMRF_2035	286627784	0.838525	0.565364	0.122983	0.03362	0.004905	0.273161
	MMRF_2038	266664346	0.887552	0.667821	0.089382	0.019347	0.003746	0.21973
	MMRF_2039	160040566	0.90578	0.627484	0.06584	0.023976	0.004424	0.278296
	MMRF_2041	222207154	0.877069	0.606435	0.081385	0.033559	0.008038	0.270634
	MMRF_2043	234082016	0.879747	0.660269	0.090609	0.022243	0.007441	0.219478
	MMRF_2047	182248934	0.926317	0.756598	0.052494	0.011611	0.009672	0.169719
	MMRF_2050	179337484	0.929475	0.716562	0.050355	0.010891	0.009337	0.212913
	MMRF_2054	223178874	0.876251	0.641513	0.094098	0.025294	0.004388	0.234738
	MMRF_2055	183384356	0.871068	0.664339	0.093805	0.020799	0.014405	0.206729
	MMRF_2056	213448726	0.842999	0.624925	0.121454	0.029044	0.006552	0.218074
	MMRF_2057	163155224	0.903343	0.690933	0.07424	0.018477	0.003968	0.21241
	MMRF_2058	#N/A	#N/A	#N/A	#N/A	#N/A	#N/A	#N/A
	MMRF_2059	199521176	0.874857	0.617441	0.097778	0.022478	0.004912	0.257416
	MMRF_2061	243281374	0.908734	0.727687	0.059656	0.015241	0.016493	0.181047
	MMRF_2062	243209036	0.845842	0.552017	0.117403	0.032083	0.004711	0.293824
	MMRF_2063	#N/A	#N/A	#N/A	#N/A	#N/A	#N/A	#N/A
	MMRF_2068	186826964	0.938857	0.685035	0.030436	0.01875	0.012008	0.253822
	MMRF_2072	265790902	0.857913	0.581325	0.110254	0.027306	0.004563	0.276588
	MMRF_2074	194367224	0.893712	0.689257	0.069746	0.015023	0.021713	0.204455
	MMRF_2076	206195998	0.876779	0.640018	0.097978	0.021888	0.003375	0.236761
	MMRF_2079	196773014	0.919129	0.72002	0.063041	0.01546	0.002384	0.199108
	MMRF_2080	184296396	0.853274	0.616763	0.12574	0.017703	0.003302	0.236511
	MMRF_2081	234277352	0.85907	0.645745	0.103258	0.030109	0.007622	0.213325
	MMRF_2082	236097800	0.915133	0.713676	0.068593	0.013625	0.002663	0.201457
	MMRF_2083	202538562	0.886149	0.658861	0.08098	0.016744	0.01621	0.227288
	MMRF_2085	#N/A	#N/A	#N/A	#N/A	#N/A	#N/A	#N/A
	MMRF_2087	196432646	0.877657	0.667249	0.09446	0.023652	0.004251	0.210408
	MMRF_2089	178040340	0.928946	0.646782	0.050393	0.013963	0.006739	0.282164
	MMRF_2090	#N/A	#N/A	#N/A	#N/A	#N/A	#N/A	#N/A
	MMRF_2091	255344414	0.918572	0.682115	0.050246	0.017381	0.013883	0.236457
	MMRF_2093	212308686	0.898538	0.69656	0.076045	0.017508	0.007969	0.201978
	MMRF_2095	#N/A	#N/A	#N/A	#N/A	#N/A	#N/A	#N/A
	MMRF_2098	217189886	0.896399	0.691912	0.073904	0.015973	0.013809	0.204487
	MMRF_2101	#N/A	#N/A	#N/A	#N/A	#N/A	#N/A	#N/A
	MMRF_2102	178046164	0.938733	0.726689	0.041767	0.012794	0.00674	0.212044
	MMRF_2106	216580042	0.894971	0.667307	0.081579	0.018162	0.005319	0.227664
	MMRF_2107	221920698	0.891896	0.643788	0.081116	0.022664	0.004348	0.248107
	MMRF_2112	#N/A	#N/A	#N/A	#N/A	#N/A	#N/A	#N/A
	MMRF_2113	204922414	0.901987	0.680218	0.061111	0.022355	0.014628	0.221769
	MMRF_2114	#N/A	#N/A	#N/A	#N/A	#N/A	#N/A	#N/A
	MMRF_2115	209557606	0.878318	0.655301	0.092679	0.016266	0.012807	0.223017
	MMRF_2116	236629608	0.911587	0.715747	0.061112	0.015647	0.011726	0.19584
	MMRF_2118	190787350	0.872986	0.581979	0.087748	0.029073	0.010256	0.291008
	MMRF_2119	236772424	0.891703	0.647619	0.078716	0.025619	0.003983	0.244084
	MMRF_2124	#N/A	#N/A	#N/A	#N/A	#N/A	#N/A	#N/A
	MMRF_2125	240288102	0.850856	0.604451	0.117149	0.027983	0.004036	0.246405
	MMRF_2126	204406686	0.892249	0.658825	0.077222	0.022258	0.008324	0.233424
	MMRF_2128	#N/A	#N/A	#N/A	#N/A	#N/A	#N/A	#N/A
	MMRF_2129	#N/A	#N/A	#N/A	#N/A	#N/A	#N/A	#N/A
	MMRF_2132	155574534	0.90736	0.638267	0.068088	0.020129	0.004446	0.269093
	MMRF_2137	#N/A	#N/A	#N/A	#N/A	#N/A	#N/A	#N/A
	MMRF_2138	#N/A	#N/A	#N/A	#N/A	#N/A	#N/A	#N/A
	MMRF_2140	188972610	0.932598	0.701544	0.047163	0.015867	0.0044	0.231053
	MMRF_2141	229415266	0.877517	0.665861	0.094505	0.021541	0.006477	0.211655
	MMRF_2143	196390072	0.899362	0.718422	0.034277	0.057609	0.008798	0.18094
	MMRF_2144	#N/A	#N/A	#N/A	#N/A	#N/A	#N/A	#N/A
	MMRF_2147	#N/A	#N/A	#N/A	#N/A	#N/A	#N/A	#N/A
	MMRF_2150	179123380	0.91524	0.718355	0.054985	0.016096	0.013763	0.196885
	MMRF_2151	245750550	0.850889	0.591087	0.1243	0.021666	0.003166	0.259801
	MMRF_2152	#N/A	#N/A	#N/A	#N/A	#N/A	#N/A	#N/A
	MMRF_2153	229025806	0.907879	0.714061	0.064382	0.015067	0.012748	0.193819
	MMRF_2159	#N/A	#N/A	#N/A	#N/A	#N/A	#N/A	#N/A
	MMRF_2160	95769722	0.607197	0.380405	0.191819	0.106617	0.097431	0.226792
	MMRF_2166	#N/A	#N/A	#N/A	#N/A	#N/A	#N/A	#N/A
	MMRF_2167	#N/A	#N/A	#N/A	#N/A	#N/A	#N/A	#N/A
	MMRF_2168	200666276	0.919446	0.669342	0.054909	0.016846	0.008837	0.250104
	MMRF_2170	167146570	0.928921	0.677381	0.034288	0.019818	0.017047	0.25154
	MMRF_2172	167654018	0.933166	0.688241	0.045897	0.012359	0.008627	0.244926
	MMRF_2173	147941544	0.916069	0.635604	0.055687	0.021068	0.007217	0.280465
	MMRF_2174	180027722	0.894118	0.597984	0.071206	0.017077	0.017671	0.296134
	MMRF_2176	184351952	0.930475	0.724335	0.035572	0.014695	0.019338	0.20614
	MMRF_2180	250618060	0.909156	0.712522	0.061957	0.017254	0.011684	0.196634
	MMRF_2181	236946128	0.932555	0.67644	0.040464	0.016918	0.010104	0.256115
	MMRF_2183	202770266	0.942688	0.718416	0.036239	0.011693	0.009418	0.224272
	MMRF_2185	#N/A	#N/A	#N/A	#N/A	#N/A	#N/A	#N/A
	MMRF_2186	236817850	0.858591	0.596585	0.105878	0.020823	0.014773	0.262006
	MMRF_2190	#N/A	#N/A	#N/A	#N/A	#N/A	#N/A	#N/A
	MMRF_2191	194526102	0.944621	0.69901	0.033028	0.014176	0.008207	0.245612
	MMRF_2194	211059508	0.911354	0.588656	0.063068	0.02031	0.005295	0.322698
	MMRF_2195	197045772	0.920011	0.68036	0.05151	0.015088	0.013445	0.239651
	MMRF_2196	#N/A	#N/A	#N/A	#N/A	#N/A	#N/A	#N/A
	MMRF_2197	199952000	0.856609	0.570151	0.098456	0.030609	0.014399	0.286459
	MMRF_2198	#N/A	#N/A	#N/A	#N/A	#N/A	#N/A	#N/A
	MMRF_2199	176523740	0.881815	0.639635	0.081421	0.026364	0.010447	0.242179
	MMRF_2200	209765868	0.870464	0.633235	0.089258	0.03041	0.009924	0.23723
	MMRF_2201	209173798	0.840915	0.562384	0.122567	0.032469	0.004071	0.278531
	MMRF_2204	234871050	0.916138	0.715582	0.053686	0.016746	0.013482	0.200556
	MMRF_2207	#N/A	#N/A	#N/A	#N/A	#N/A	#N/A	#N/A
	MMRF_2209	220705082	0.933492	0.644696	0.042304	0.014609	0.009631	0.288796
	MMRF_2211	216188690	0.913348	0.633618	0.060433	0.020729	0.005512	0.279731
	MMRF_2213	191570168	0.900251	0.65298	0.066974	0.024114	0.008699	0.247271
	MMRF_2214	217182402	0.901164	0.617421	0.067434	0.021919	0.009531	0.283743
	MMRF_2215	262633032	0.917048	0.698617	0.058652	0.016163	0.008178	0.218431
	MMRF_2216	199931264	0.904835	0.690295	0.06504	0.01947	0.010706	0.21454
	MMRF_2217	215160712	0.865235	0.54175	0.097376	0.028241	0.009183	0.323486
	MMRF_2220	244979738	0.889698	0.702313	0.052281	0.050783	0.007278	0.187385
	MMRF_2222	#N/A	#N/A	#N/A	#N/A	#N/A	#N/A	#N/A
	MMRF_2223	#N/A	#N/A	#N/A	#N/A	#N/A	#N/A	#N/A
	MMRF_2224	188103320	0.89635	0.600618	0.080022	0.017878	0.00578	0.295732
	MMRF_2225	178767626	0.851982	0.560663	0.121371	0.020669	0.006007	0.291319
	MMRF_2226	#N/A	#N/A	#N/A	#N/A	#N/A	#N/A	#N/A
	MMRF_2228	231131316	0.867672	0.64839	0.09289	0.01971	0.019846	0.219283
	MMRF_2229	206780632	0.930224	0.73244	0.043391	0.015609	0.010836	0.197784
	MMRF_2230	249296894	0.895492	0.697877	0.068674	0.030646	0.005215	0.197615
	MMRF_2232	267750490	0.891616	0.629108	0.077063	0.023073	0.008291	0.262508
	MMRF_2238	223543766	0.887121	0.648044	0.084519	0.021795	0.006604	0.239076
	MMRF_2239	#N/A	#N/A	#N/A	#N/A	#N/A	#N/A	#N/A
	MMRF_2240	194268954	0.897944	0.704816	0.060564	0.020178	0.021429	0.193129
	MMRF_2245	187676714	0.909028	0.640887	0.071277	0.01644	0.003272	0.268141
	MMRF_2246	#N/A	#N/A	#N/A	#N/A	#N/A	#N/A	#N/A
	MMRF_2250	232631866	0.91772	0.664424	0.05823	0.01675	0.007329	0.253296
	MMRF_2251	241175016	0.896456	0.63891	0.077611	0.017194	0.008789	0.257546
	MMRF_2253	236824532	0.905006	0.697512	0.064274	0.019188	0.011587	0.207494
	MMRF_2257	165057434	0.886995	0.631885	0.084063	0.022235	0.006741	0.25511
	MMRF_2258	210559868	0.93293	0.758637	0.046374	0.011163	0.009589	0.174293
	MMRF_2266	263133560	0.902429	0.629097	0.067244	0.025798	0.00456	0.273332
	MMRF_2267	205671888	0.902485	0.664983	0.066833	0.019754	0.010992	0.237502
	MMRF_2268	128792224	0.946285	0.658851	0.033701	0.01177	0.008278	0.287434
	MMRF_2269	199168798	0.905685	0.684349	0.064872	0.01753	0.011958	0.221336
	MMRF_2270	#N/A	#N/A	#N/A	#N/A	#N/A	#N/A	#N/A
	MMRF_2271	230871744	0.916673	0.695585	0.05334	0.017025	0.013024	0.221088
	MMRF_2272	240473336	0.881151	0.642374	0.079204	0.017935	0.02181	0.238778
	MMRF_2273	144837686	0.926927	0.653667	0.051184	0.015834	0.006081	0.27326
	MMRF_2279	208646634	0.880764	0.626209	0.081358	0.022067	0.015878	0.254555
	MMRF_2281	#N/A	#N/A	#N/A	#N/A	#N/A	#N/A	#N/A
	MMRF_2284	#N/A	#N/A	#N/A	#N/A	#N/A	#N/A	#N/A
	MMRF_2286	217803214	0.955379	0.745398	0.02247	0.01343	0.008774	0.20998
	MMRF_2288	#N/A	#N/A	#N/A	#N/A	#N/A	#N/A	#N/A
	MMRF_2289	#N/A	#N/A	#N/A	#N/A	#N/A	#N/A	#N/A
	MMRF_2290	226179928	0.887889	0.599061	0.085724	0.020902	0.005512	0.288828
	MMRF_2291	208852132	0.899809	0.615328	0.063375	0.026385	0.010478	0.28448
	MMRF_2293	167367246	0.890429	0.63654	0.077748	0.02598	0.00587	0.253889
	MMRF_2297	219545936	0.923234	0.736092	0.046683	0.0119	0.018294	0.187142
	MMRF_2300	182005312	0.839696	0.538728	0.125198	0.026862	0.008289	0.300968
	MMRF_2301	210145260	0.878312	0.578397	0.086247	0.022963	0.012549	0.299915
	MMRF_2302	280239968	0.907821	0.698324	0.063749	0.014651	0.013857	0.209497
	MMRF_2305	250926562	0.871351	0.598334	0.097622	0.024909	0.006146	0.273017
	MMRF_2306	274897148	0.926221	0.710904	0.036815	0.03031	0.006687	0.215317
	MMRF_2307	260441718	0.897635	0.67339	0.080096	0.018878	0.003408	0.224244
	MMRF_2308	#N/A	#N/A	#N/A	#N/A	#N/A	#N/A	#N/A
	MMRF_2310	187761176	0.904167	0.581946	0.068683	0.022342	0.004835	0.322221
	MMRF_2313	228187910	0.908992	0.676203	0.069478	0.017178	0.004373	0.232789
[truncated: 161 more rows]
