# Supplementary material for: Comprehensive molecular profiling of 718 Multiple Myelomas reveals significant differences in mutation frequencies between African and European descent cases
Source: PLoS Genet. 2017 Nov 22;13(11):e1007087. doi: 10.1371/journal.pgen.1007087 (PMC5699827; doi:10.1371/journal.pgen.1007087)
Supplement: S6 Table — (XLSX) [file pgen.1007087.s011.xlsx]

## Sheet: GISTIC
S6 Table. GISTIC output of significant calls
AFRICAN-AMERICAN (GAINS)
cytoband	q value	residual q value	wide peak boundaries	genes in wide peak
14q11.2	4.0573e-42	4.0573e-42	chr14:22694801-22963999	[DAD1]
7p14.1	4.6477e-42	4.758e-42	chr7:38313201-38398199	TARP	LOC100506776
7q34	2.0709e-25	2.4306e-25	chr7:142479901-142494399	PRSS2	TRY6
19q13.42	1.0339e-06	7.3098e-06	chr19:55253401-55267499	KIR2DL3
9p11.2	4.2098e-06	1.3994e-05	chr9:45730051-46117349	[FAM27A]
22q11.22	1.7974e-05	2.481e-05	chr22:23256201-23401349	[RTDR1]
14q32.33	3.1269e-05	3.1269e-05	chr14:105954901-106067899	CRIP1	TMEM121	C14orf80
16q22.1	0.00010056	0.00010056	chr16:70260851-70284599	EXOSC6
7q11.23	0.00013075	0.00017744	chr7:72669701-72714699	GTF2IRD2P1
16p11.2	0.00031549	0.00031549	chr16:32329301-32486699	[LOC390705]
6p24.3	0.00024477	0.00097093	chr6:7899951-7910499	TXNDC5	MUTED-TXNDC5
1q21.2	1.5215e-05	0.0021433	chr1:148202051-148349599	PPIAL4D	PPIAL4F
19q13.31	0.0033262	0.0033262	chr19:43757351-43762449	PSG9
2q12.2	0.0027972	0.0064323	chr2:107029301-107084599	RGPD3
16p13.11	0.0092818	0.0092818	chr16:14982901-15068999	hsa-mir-3180-1	NPIP	PDXDC1	NOMO1	MIR3180-3	MIR3180-1	MIR3179-2	MIR3180-2	MIR3179-1	MIR3179-3
8q24.21	0.012529	0.012529	chr8:128747851-128972649	hsa-mir-1204	MYC	PVT1	MIR1204
1q31.3	0.020369	0.020369	chr1:196743951-196871549	CFHR1	CFHR4	CFHR3
4p16.1	0.020369	0.020369	chr4:9495401-9694549	hsa-mir-548i-2	MIR548I2
5q35.3	0.020369	0.020369	chr5:180376451-180432699	BTNL3	BTNL8
15q24.2	0.0064992	0.020369	chr15:75552551-75594999	GOLGA6C	GOLGA6D
16p12.3	0.020369	0.020369	chr16:18896301-19027749	SMG1	TMC7
11q13.2	0.020369	0.023015	chr11:67572601-67761149	UNC93B1	FAM86C2P
20q13.33	0.030996	0.030996	chr20:60293401-63025520	hsa-mir-647	hsa-mir-4326	hsa-mir-124-3	hsa-mir-133a-2	hsa-mir-3195	hsa-mir-1257	CDH4	CHRNA4	COL9A3	EEF1A2	NPBWR2	KCNQ2	LAMA5	MYT1	NTSR1	OPRL1	PSMA7	PTK6	RPS21	SRMS	TAF4	TCEA2	TPD52L2	TNFRSF6B	OSBPL2	ARFRP1	RGS19	TCFL5	ADRM1	OGFR	DIDO1	HRH3	PRPF6	SS18L1	GTPBP5	GMEB2	SLCO4A1	STMN3	RTEL1	SOX18	YTHDF1	LIME1	UCKL1	C20orf11	PCMTD2	C20orf20
1q21.3	0.0090118	0.032121	chr1:152573001-152636349	LCE2D	LCE3A	LCE3B	LCE3C
2q11.2	0.023064	0.032121	chr2:97869801-97890499	ANKRD36
2q13	0.021306	0.032121	chr2:114257451-114354049	hsa-mir-1302-3	FOXD4L1	WASH2P	FAM138B
2q11.1	0.027092	0.032121	chr2:96559301-96585549	[LOC729234]
4p16.3	0.032121	0.032121	chr4:4086001-4176699	[OTOP1]
5q13.2	0.032121	0.032121	chr5:70369801-70503799	LOC647859
6p25.3	0.020369	0.032121	chr6:1-395599	IRF4	DUSP22
8p11.22	0.032121	0.032121	chr8:39181451-39325099	ADAM3A	ADAM5P
9q13	0.020369	0.032121	chr9:67281601-67954699	ANKRD20A1	AQP7P1	ANKRD20A3	FAM27B
10q11.22	0.032121	0.032121	chr10:48922451-49386049	FRMPD2	LOC399753	BMS1P5	FAM25C	BMS1P1	FRMPD2P1	FAM25B	FAM25G
11q13.4	0.020369	0.032121	chr11:71417451-71506599	FAM86C1
11p15.4	0.023064	0.032121	chr11:3435801-3649899	TRPC2
11q23.3	0.032121	0.032121	chr11:96126001-135006516	hsa-mir-3167	hsa-mir-100	hsa-mir-4301	hsa-mir-34c	ACAT1	ACRV1	BIRC2	BIRC3	APLP2	APOA1	APOA4	APOC3	ARCN1	ATM	FXYD2	CXCR5	CASP1	CASP4	CASP5	CBL	CD3D	CD3E	CD3G	CHEK1	CRYAB	DDX6	DDX10	DLAT	DPAGT1	DRD2	ETS1	FDX1	FLI1	SLC37A4	GRIA4	GRIK4	GUCY1A2	H2AFX	HMBS	HSPA8	HSPB2	HTR3A	IL10RA	IL18	STT3A	KCNJ1
11p15.4	0.032121	0.032121	chr11:5798801-5810099	OR52N1	OR52N5
11q13.3	0.020369	0.032121	chr11:69456001-69589499	CCND1	FGF4	FGF19	ORAOV1
15q13.3	0.032121	0.032121	chr15:32739451-32908099	ARHGAP11A	LOC100288615
15q25.2	0.030996	0.032121	chr15:84873301-85081699	GOLGA6L5	LOC388152	UBE2Q2P1	DNM1P41	LOC440300
18p11.21	0.032121	0.032121	chr18:14221051-14361299	CYP4F35P	ANKRD20A5P
21q22.3	0.032121	0.032121	chr21:46713251-46875599	COL18A1	LINC00315	COL18A1-AS1	LOC642852
21q11.2	0.032121	0.032121	chr21:15289001-15373749	ANKRD20A11P
7q11.23	0.032121	0.040916	chr7:74346851-74480299	WBSCR16	GATSL1
11p15.5	0.032121	0.040916	chr11:1265251-1275299	MUC5B
1p36.33	0.036844	0.042869	chr1:934651-1956699	hsa-mir-429	CDK11B	DVL1	GABRD	GNB1	SCNN1D	TNFRSF4	MMP23B	MMP23A	TNFRSF18	ISG15	SLC35E2	SSU72	SDF4	MXRA8	CPSF3L	C1orf159	AURKAIP1	MRPL20	ATAD3A	HES4	VWA1	NADK	GLTPD1	CCNL2	TAS1R3	ATAD3B	KIAA1751	ACAP3	UBE2J2	PUSL1	B3GALT6	MIB2	LOC148413	CALML6	ATAD3C	LOC254099	TTLL10	TMEM240	TMEM52	AGRN	FAM132A	RNF223	MIR200A	MIR200B	ANKRD65
19q13.42	0.020369	0.043766	chr19:55340901-55378299	KIR2DS4	KIR3DL1	KIR3DL2
1q21.1	0.0035852	0.044333	chr1:146012501-146514349	NBPF11	NBPF24	LOC728989
2p11.1	0.029233	0.045511	chr2:92071151-95457999	LOC90499	ACTR3BP2	ANKRD20A8P
1q23.1	0.017863	0.046136	chr1:152595551-159170599	hsa-mir-765	hsa-mir-9-1	hsa-mir-555	hsa-mir-92b	hsa-mir-4258	hsa-mir-190b	ADAR	BGLAP	CD1A	CD1B	CD1C	CD1D	CD1E	CD5L	CHRNB2	CKS1B	CLK2	CRABP2	EFNA1	EFNA3	EFNA4	ETV3	FDPS	GBA	GBAP1	HDGF	IFI16	IL6R	ILF2	INSRR	IVL	KCNN3	LMNA	LOR	SMCP	MEF2D	MNDA	MTX1	MUC1	NPR1	NTRK1	PKLR	PRCC	RAB13	RIT1	RPS27
16p13.11	0.046136	0.046136	chr16:15204351-15494599	MPV17L	MIR3180-4
21q22.3	0.03462	0.048365	chr21:44891401-45011899	HSF2BP	LINC00313
5q31.2	0.048983	0.048983	chr5:138643401-139622849	PURA	UBE2D2	NRG2	MATR3	SLC23A1	MZB1	PAIP2	CXXC5	PSD2	C5orf32	SPATA24	DNAJC18	TMEM173	C5orf65	IGIP	ECSCR
15q22.31	0.030996	0.052979	chr15:63673801-63889399	CA12	USP3	LOC100130855
9q21.11	0.032121	0.058233	chr9:69247451-69634949	CBWD6	ANKRD20A4
2q12.3	0.032121	0.063871	chr2:109345451-109380299	RANBP2
2p11.1	0.032121	0.06544	chr2:90458251-91809199	[LOC654342]
4p16.3	0.070248	0.077731	chr4:1-86549	ZNF595	ZNF718
20q11.22	0.084963	0.084963	chr20:32848001-33000599	AHCY	ASIP	ITCH
1p36.21	0.079266	0.10386	chr1:12987901-13183849	PRAMEF5	PRAMEF6	LOC440563	PRAMEF22
9p11.2	0.042869	0.10386	chr9:43828301-44175749	CNTNAP3B
5q13.2	0.096984	0.1063	chr5:68929901-70081249	SMN1	SMN2	SERF1A	SMA4	SMA5	GUSBP3	GTF2H2B	SERF1B	GUSBP9	LOC100170939
19p13.12	0.11622	0.11622	chr19:16267751-16590649	AP1M1	KLF2	FAM32A	EPS15L1	HSH2D	CIB3	CALR3
8p23.1	0.12098	0.12098	chr8:12051401-12423299	FAM86B1	DEFB109P1	DEFB130	FAM90A25P	FAM86B2	FAM66A	LOC100133267	LOC100506990
9q34.2	0.12876	0.12876	chr9:137313801-137322349	RXRA
7p21.3	0.070248	0.13467	chr7:7777151-8099949	GLCCI1	LOC729852
7q22.1	0.079266	0.13773	chr7:102213051-102246249	RASA4	POLR2J3
1q44	0.14658	0.14658	chr1:233766901-249250621	hsa-mir-3124	hsa-mir-3123	hsa-mir-1537	ACTN2	ADSS	CHML	LYST	CHRM3	FH	GNG4	HNRNPU	KCNK1	LGALS8	MTR	NID1	RGS7	RYR2	TARBP1	TBCE	GPR137B	ZNF124	KMO	EXO1	GGPS1	TOMM20	CEP170	AKT3	ZNF238	SDCCAG8	RBM34	OPN3	TRIM58	AHCTF1	OR1C1	OR2M4	OR2L2	OR2L1P	OR2T1	PPPDE1	SCCPDH	ARID4B	KIF26B	HEATR1	ZNF692	ERO1LB	FMN2
2p11.2	0.14658	0.14658	chr2:88003851-88019349	[PLGLB2]
7p15.3	0.10386	0.17283	chr7:22767201-23728999	CLK2P	IL6	GPNMB	IGF2BP3	NUPL2	TRA2A	TOMM7	KLHL7	FAM126A	CCDC126	C7orf30	RPS2P32	C7orf46	SNORD93	KLHL7-AS1
22q11.21	0.10386	0.17283	chr22:18778551-18897749	GGT3P	DGCR6
1q21.1	0.057323	0.18219	chr1:143194101-143744149	hsa-mir-3118-3	FLJ39739	LOC100130000	LOC100286793
3q25.31	0.19467	0.19467	chr3:118905401-198022430	hsa-mir-922	hsa-mir-570	hsa-mir-3137	hsa-mir-944	hsa-mir-28	hsa-mir-1248	hsa-mir-1224	hsa-mir-569	hsa-mir-551b	hsa-mir-720	hsa-mir-1263	hsa-mir-16-2	hsa-mir-1280	hsa-mir-548i-1	hsa-mir-544b	hsa-mir-198	AADAC	ACPP	ACTL6A	ADCY5	ADPRH	AGTR1	AHSG	APOD	ATP1B3	ATR	BCHE	BCL6	BDH1	FOXL2	CASR	CD80	CD86	AP2M1	CLCN2	CP	CPA3	CPB1	CPN2	CRYGS	CSTA	DGKG	DLG1	DVL3	ECT2	EHHADH
5q35.3	0.14973	0.19467	chr5:177163701-177302999	FAM153A	LOC728554
8p23.1	0.20766	0.20766	chr8:11213601-11292649	FAM167A	C8orf12	TDH
22q13.1	0.22182	0.22182	chr22:38201301-39378199	hsa-mir-659	CSNK1E	H1F0	KCNJ4	POLR2F	SOX10	PLA2G6	GALR3	PICK1	GTPBP1	JOSD1	DNAL4	DDX17	KDELR3	DMC1	GCAT	CBX6	NPTXR	SLC16A8	MAFF	CBY1	SUN2	TMEM184B	EIF3L	TOMM22	BAIAP2L2	C22orf23	MICALL1	ANKRD54	APOBEC3A	LOC400927	LOC646851	MIR658	MIR659	MIR4534
19q13.42	0.11159	0.23689	chr19:54801801-54818799	LILRA3	LILRA5
AFRICAN-AMERICAN (LOSS)
cytoband	q value	residual q value	wide peak boundaries	genes in wide peak
14q32.33	5.2613e-305	2.6114e-284	chr14:106130901-106452449	ELK2AP	ADAM6	KIAA0125
2p11.2	1.7538e-159	1.7538e-159	chr2:89096301-91824799	MIR4436A
22q11.22	2.1413e-41	2.1413e-41	chr22:23101151-23401599	hsa-mir-650	MIR650	IGLL5
8p23.1	2.1111e-17	3.0272e-15	chr8:7693701-7752199	SPAG11B	DEFB103B	DEFB104A	DEFB103A	DEFB104B	SPAG11A
12p13.31	3.9467e-09	1.2579e-08	chr12:8375551-8519249	FAM86FP
14q24.3	1.1661e-16	1.3954e-08	chr14:73945401-74058449	ACOT2	C14orf169	ACOT1
1p22.2	1.1699e-18	7.7679e-08	chr1:91448101-91967199	HFM1
1p21.1	3.1532e-17	1.0885e-07	chr1:104094301-104116299	LOC648740
13q31.1	4.6381e-10	1.1953e-07	chr13:79233301-80055199	RBM26	RBM26-AS1
14q32.33	5.2641e-103	1.499e-07	chr14:106732951-107349540	LINC00226	LINC00221
1p12	2.2198e-13	2.5458e-07	chr1:117753551-118475749	MAN1A2	GDAP2	FAM46C
8p23.2	7.7679e-08	3.2645e-06	chr8:2093301-6263949	CSMD1
1p31.1	6.7255e-12	1.1609e-05	chr1:72748001-74934049	FPGT	LRRIQ3	FPGT-TNNI3K
14q22.3	8.0825e-10	1.322e-05	chr14:56046601-56232999	KTN1
10p11.21	2.2713e-05	2.4916e-05	chr10:35930351-38092649	ANKRD30A	MTRNR2L7
12p13.2	4.797e-08	6.604e-05	chr12:10573101-10598699	KLRC2
16q23.1	2.2266e-06	8.4231e-05	chr16:74340151-74657499	GLG1	LOC283922	CLEC18B
14q23.3	4.8215e-11	0.00024418	chr14:66964601-67656249	GPHN
4p16.3	0.00031546	0.00033829	chr4:1-1902149	hsa-mir-571	ATP5I	CTBP1	DGKQ	FGFR3	GAK	IDUA	LETM1	MYL5	PDE6B	ZNF141	SLBP	MAEA	PCGF3	SPON2	TACC3	CPLX1	SLC26A1	FGFRL1	PIGG	KIAA1530	ABCA11P	MFSD7	TMEM175	C4orf42	TMEM129	ZNF595	FAM53A	ZNF721	ZNF718	CRIPAK	RNF212	ZNF876P	ZNF732	LOC100129917	LOC100130872	TMED11P
6p12.3	0.00035387	0.00064236	chr6:49916851-50011299	DEFB110	DEFB113	DEFB114
13q13.3	4.2409e-05	0.00074452	chr13:37970901-38211099	POSTN	LINC00547
1p31.1	2.2201e-14	0.00080515	chr1:79472051-84764099	PRKACB	LPHN2	TTLL7
12p13.2	1.3661e-06	0.0012103	chr12:11214801-11338299	TAS2R43	TAS2R30	LOC100129361
16q12.1	0.00071713	0.0013652	chr16:50711601-50783449	hsa-mir-3181	NOD2
10p13	0.0013901	0.0014696	chr10:15761751-16555799	PTER	FAM188A
2p24.1	0.0016075	0.0016008	chr2:21266901-23971549	KLHL29	LOC645949
12q23.2	0.0016008	0.0018182	chr12:102512301-102591349	PARPBP
20q13.33	0.0013529	0.0018519	chr20:58422701-58516949	PPP1R3D	SYCP2
6q27	0.0012396	0.0019716	chr6:167755401-168187349	TCP10
14q32.12	2.2578e-06	0.0030208	chr14:93753851-94184649	BTBD7	UNC79	COX8C
16q22.1	1.4406e-06	0.0031774	chr16:70099751-70208699	PDPR
22q13.2	0.0033617	0.0032929	chr22:42828201-42969599	RRP7A	SERHL
2q32.1	0.0026767	0.0038039	chr2:185804201-187350899	FSIP2
12p13.2	5.2295e-06	0.0040017	chr12:11463201-11802649	PRB1	LOC338817	PRB2
14q32.32	1.8205e-07	0.0047124	chr14:103196801-103389249	TRAF3
16q21	0.0012072	0.0048912	chr16:59785901-64980699	CDH8	LOC644649
13q13.3	0.00025375	0.0058988	chr13:34540401-36296849	MAB21L1	NBEA
4q13.1	0.0044671	0.0066581	chr4:65730151-66535949	EPHA5	LOC401134
4q21.21	0.0075739	0.0080269	chr4:79531551-79839099	BMP2K	LOC100505702
17p11.2	0.0075892	0.0080269	chr17:16676901-16946099	TNFRSF13B	USP32P1	KRT16P2	FAM106CP
13q14.2	9.7131e-05	0.0086121	chr13:48836201-49281299	RCBTB2	RB1	LPAR6
8p23.1	1.9549e-05	0.010605	chr8:11189351-11400399	FAM167A	C8orf12	TDH
2q22.1	0.0090213	0.012083	chr2:139537901-143642649	LRP1B	LOC647012
16q23.2	0.00097696	0.01329	chr16:81129751-81348599	BCMO1	PKD1L2
12p13.31	7.2092e-06	0.014578	chr12:9596401-9821999	KLRB1	LOC374443
13q12.12	0.0053605	0.016323	chr13:24471101-24889899	hsa-mir-2276	SPATA13	MIR2276
8p21.3	0.0015271	0.020161	chr8:22974901-23048999	TNFRSF10D
14q31.3	4.8653e-08	0.021276	chr14:87389001-88476649	GALC
1q21.2	0.015681	0.026675	chr1:147578951-148202049	NBPF14	PPIAL4A	FLJ39739	PPIAL4B
2q24.2	0.012436	0.026675	chr2:163175001-163279799	GCA
8p12	0.015011	0.027389	chr8:30670301-30853399	TEX15
13q12.12	0.0095983	0.028071	chr13:25078101-25338299	ATP12A	TPTE2P6
20q13.12	0.01538	0.028071	chr20:41818251-47664049	ADA	CD40	EYA2	HNF4A	KCNS1	MMP9	MYBL2	PI3	PLTP	CTSA	SDC4	SEMG1	SEMG2	SRSF6	SLPI	STK4	TNNC2	YWHAB	MKRN7P	NCOA3	MATN4	WISP2	ACOT8	SGK2	WFDC2	ARFGEF2	SPINT3	TOMM34	SERINC3	UBE2C	PKIG	RBPJL	ZMYND8	L3MBTL1	TP53TG5	SLC35C2	IFT52	C20orf111	PIGT	ZNF334	DBNDD2	SULF2	SPINLW1	JPH2	SLC12A5	PREX1
3q26.1	0.030558	0.030558	chr3:163889301-164904599	hsa-mir-720	SI
10p12.33	0.030795	0.033709	chr10:18089801-18241899	hsa-mir-511-2	MRC1	MIR511-1	MIR511-2
4p15.33	0.019587	0.035929	chr4:13339901-13548299	NKX3-2	RAB28	LOC285547
4q34.2	0.026675	0.035929	chr4:176923601-177105749	WDR17
13q22.2	0.00018071	0.035929	chr13:76056201-76194599	UCHL3	COMMD6
4p14	0.024309	0.036882	chr4:31144701-36283299	ARAP2
8q21.3	0.036118	0.036882	chr8:87573701-87878699	CNGB3
10q25.3	0.038777	0.036882	chr10:116735001-117822799	ATRNL1
13q12.12	0.019969	0.03899	chr13:24250201-24464999	MIPEP
16q22.1	9.9704e-08	0.03899	chr16:70191051-70284599	CLEC18C	LOC729513
21q11.2	0.040552	0.03899	chr21:11097701-14780599	hsa-mir-3156-3	ANKRD30BP2	MIR3156-3
2q11.2	0.04168	0.04099	chr2:97757601-97987349	ANKRD36	LOC100506123
14q11.2	0.044921	0.046142	chr14:1-20248599	OR11H2	POTEG	OR11H12	OR4Q3	POTEM	LOC642426
8p23.1	0.00080515	0.048627	chr8:11990401-12423299	FAM86B1	DEFB109P1	DEFB130	USP17L2	FAM90A25P	FAM86B2	FAM66A	LOC100133267	LOC100506990
11q21	0.051355	0.050141	chr11:94964201-95523649	FAM76B
16p13.11	0.045897	0.050141	chr16:15005551-15131749	hsa-mir-1972-1	NPIP	PDXDC1
1p31.3	1.1609e-05	0.053794	chr1:62917251-63836299	FOXD3	ANGPTL3	ATG4C	DOCK7	LINC00466
4p16.1	0.028058	0.059939	chr4:9431201-9783649	hsa-mir-548i-2	DEFB131	MIR548I2
6q22.33	0.046142	0.059939	chr6:128222201-129204299	PTPRK
1q21.1	0.024322	0.066327	chr1:144053451-144852349	PPIAL4A	NBPF9	PPIAL4B	LOC653513	PPIAL4C	LOC728855	LOC728875	PFN1P2
2q31.2	0.041048	0.066327	chr2:177055601-178095299	hsa-mir-1246	MTX2	HNRNPA3	LOC375295	MIR1246	MIR4444-1
14q11.2	0.064539	0.06831	chr14:24422801-24505749	DHRS4	DHRS4L2
1p36.13	0.03899	0.0724	chr1:16954001-17017849	MST1P2	MIR3675
9p11.2	0.07198	0.0724	chr9:45727501-65506149	KGFLP1	FAM74A4	LOC643648	FAM74A2
13q13.1	0.018721	0.0724	chr13:32376401-32877999	FRY	EEF1DP3
13q12.11	0.036539	0.077706	chr13:22033451-22245399	EFHA1
1p11.2	1.0229e-05	0.088591	chr1:120935901-143194099	hsa-mir-3118-2	hsa-mir-3118-1	LOC375010	EMBP1
4q12	0.10125	0.098674	chr4:54232201-54326999	FIP1L1
17p12	0.092672	0.098674	chr17:11462101-11873199	DNAH9
6q12	0.10847	0.10847	chr6:66499301-70385799	BAI3
12q21.2	0.089621	0.10847	chr12:77458501-79610999	NAV3
12p12.1	0.051355	0.10847	chr12:21242701-21525999	SLCO1A2	SLCO1B1
12q21.31	0.089816	0.11453	chr12:85421601-85674099	LRRIQ1
4q24	0.12313	0.12041	chr4:103681851-103790149	UBE2D3
17q21.2	0.12188	0.12041	chr17:38080501-40811299	ACLY	ATP6V0A1	CDC6	CCR7	CNP	CSF3	GAST	KAT2A	HCRT	HSD17B1	IGFBP4	JUP	KRT9	KRT10	KRT12	KRT13	KRT14	KRT15	KRT16	KRT17	KRT19	KRT31	KRT32	KRT33A	KRT33B	KRT34	KRT35	NAGLU	PSMD3	RAB5C	RARA	SMARCE1	STAT3	STAT5A	STAT5B	MLX	THRA	TOP2A	DNAJC7	TUBG1	KRT38	KRT37	KRT36	HAP1	NR1D1	MED24
20p12.1	0.11992	0.12041	chr20:13610501-13765799	ESF1
2p14	0.12583	0.12374	chr2:67211551-68273299	ETAA1	LOC644838
13q21.33	0.0022605	0.12374	chr13:68485701-73284199	DACH1	ATXN8OS	KLHL1	LINC00550
16q22.2	0.020315	0.12374	chr16:70835001-71316099	HYDIN
20q11.23	0.12532	0.12374	chr20:35520051-35631999	SAMHD1
1p36.31	0.083424	0.13461	chr1:1-10287749	hsa-mir-34a	hsa-mir-4252	hsa-mir-551a	hsa-mir-4251	hsa-mir-429	hsa-mir-1302-2	RERE	CA6	CDK11B	DFFB	DVL1	MEGF6	ENO1	GABRD	GNB1	ZBTB48	TNFRSF9	PEX10	PIK3CD	PRKCZ	RPL22	SCNN1D	SKI	SLC2A5	TP73	TNFRSF4	MMP23B	MMP23A	KCNAB2	TNFRSF25	TNFRSF14	TNFRSF18	PER3	VAMP3	H6PD	ISG15	PLCH2	CEP104	KLHL21	SLC35E2	UBE4B	UTS2	RER1	PARK7	ACOT7	CLSTN1
2q37.3	0.12968	0.13461	chr2:238317751-238475249	MLPH
13q14.2	0.0023316	0.13461	chr13:47325701-47407549	ESD
6p12.1	0.073408	0.13507	chr6:55740301-56322799	COL21A1
13q34	0.065952	0.13507	chr13:111567301-113030699	SOX1	ARHGEF7	TEX29
7q35	0.14966	0.14966	chr7:143269901-143554199	LOC154761	FAM115C	CTAGE6P
13q33.3	0.10182	0.15796	chr13:108956001-110406299	MYO16
4q25	0.16232	0.16761	chr4:113108001-113238349	AP1AR	TIFA
13q13.1	0.014431	0.16761	chr13:32886001-32975599	BRCA2
13q21.32	0.0013977	0.16761	chr13:63745901-70274599	PCDH9	OR7E156P	LINC00550
1p31.2	3.933e-06	0.17147	chr1:68915501-70225999	DEPDC1
7p21.1	0.11291	0.17147	chr7:17385601-18066399	SNX13
4q13.3	0.083761	0.1821	chr4:70621101-70797999	SULT1E1
7p22.1	0.11882	0.19189	chr7:1-7277749	hsa-mir-589	hsa-mir-339	ACTB	GNA12	GPER	LFNG	NUDT1	PDGFA	PMS2	PRKAR1B	RAC1	FSCN1	ZNF12	AIMP2	MAFK	MAD1L1	EIF3B	CYTH3	KIAA0415	KDELR2	ADAP1	IQCE	SUN1	WIPI2	INTS1	EIF2AK1	SNX8	FTSJ2	GET4	CCZ1	RNF216	ZNF853	CYP2W1	HEATR2	ZDHHC4	CHST12	RADIL	PAPOLB	FAM20C	RBAK	C7orf26	MICALL2	FBXL18	TTYH3	USP42	PSMG3
9p24.1	0.19545	0.19189	chr9:4861001-5231449	JAK2	INSL6
16q12.2	0.091053	0.19189	chr16:55807301-55880099	CES1
6q23.3	0.14074	0.2001	chr6:135560351-135823499	AHI1
7q21.11	0.20332	0.2001	chr7:81399451-82387699	CACNA2D1
14q12	0.078251	0.2001	chr14:27396901-31343799	hsa-mir-3171	FOXG1	PRKD1	SCFD1	G2E3	C14orf23	LOC100505967	MIR548AI
2q24.3	0.12335	0.20531	chr2:166810301-167051899	SCN1A
4q21.21	0.19578	0.20531	chr4:80578901-81120999	GDEP	ANTXR2
16p13.3	0.18038	0.20531	chr16:1-11026299	hsa-mir-3178	hsa-mir-940	hsa-mir-1225	hsa-mir-3177	hsa-mir-662	hsa-mir-3176	ABAT	ABCA3	ADCY9	ARHGDIG	ATP6V0C	CCNF	CLCN7	CREBBP	ECI1	DNASE1	DNASE1L2	E4F1	EMP2	GFER	GRIN2A	HAGH	HBA1	HBA2	HBM	HBQ1	HBZ	HMOX2	IGFALS	MEFV	CIITA	MPG	NUBP1	NDUFB10	NME3	NME4	NTHL1	NTN3	OR1F1	OR2C1	PDPK1	PKD1	PMM2	PPL	RPL3L	RPS2
2q31.1	0.16044	0.23236	chr2:174233701-175199549	SP3	OLA1	LOC285084
6q16.1	0.23249	0.24214	chr6:96653401-97027249	UFL1
8q21.13	0.21441	0.24214	chr8:82671701-85097099	SNX16
14q32.31	0.0042057	0.24214	chr14:96731101-105452149	hsa-mir-203	hsa-mir-4309	hsa-mir-1247	hsa-mir-656	hsa-mir-370	hsa-mir-345	hsa-mir-342	AKT1	CKB	DIO3	DYNC1H1	EIF5	EML1	HSP90AA1	KLC1	MARK3	PPP2R5C	MOK	TNFAIP2	TRAF3	VRK1	WARS	XRCC3	YY1	DLK1	CCNK	BAG5	C14orf2	CDC42BPB	TECPR2	SIVA1	CYP46A1	PAPOLA	RCOR1	PPP1R13B	KIF26A	EVL	C14orf129	CINP	ATG2B	MEG3	ZNF839	BEGAIN	DIO3OS	INF2	BCL11B
14q32.33	4.4535e-05	0.24214	chr14:105399551-105452699	AHNAK2
4q34.1	0.19761	0.25049	chr4:174459501-175220099	FBXO8
10q21.1	0.2536	0.25049	chr10:54531451-58117149	hsa-mir-548f-1	PCDH15	MTRNR2L5
CAUCASIAN (GAINS)
cytoband	q value	residual q value	wide peak boundaries	genes in wide peak
14q11.2	4.8639e-224	4.8639e-224	chr14:22236951-22990949	[DAD1]
7q34	5.5307e-93	1.6605e-92	chr7:142460851-142510649	PRSS1	PRSS2	TRY6
8q24.21	3.1776e-29	2.3895e-27	chr8:128327901-130762299	hsa-mir-1208	hsa-mir-1207	hsa-mir-1205	hsa-mir-1204	MYC	POU5F1B	PVT1	GSDMC	LOC727677	LOC728724	MIR1205	MIR1206	MIR1207	MIR1204	MIR1208
14q32.33	9.7017e-16	9.7017e-16	chr14:105941151-107349540	CRIP1	CRIP2	ELK2AP	ADAM6	KIAA0125	TMEM121	C14orf80	LINC00226	LINC00221
2p11.1	1.2261e-10	1.2261e-10	chr2:91724101-91935899	LOC654342
5q35.3	5.5059e-09	5.6296e-09	chr5:180409001-180432849	BTNL3
1q44	1.0692e-08	9.9453e-08	chr1:248722601-248845299	OR2T34	OR2T10	OR2T11	OR2T29	OR14I1	OR2T27	OR2T35
3q26.2	3.0534e-07	3.0534e-07	chr3:169098901-170184799	MECOM	CLDN11	PRKCI	SKIL	TERC	SEC62	GPR160	MYNN	SLC7A14	LRRC31	PHC3	ARPM1	LRRC34	LRRIQ4	SAMD7	LOC100128164
1q31.3	2.5251e-07	6.6075e-07	chr1:196743751-196875949	CFHR1	CFHR4	CFHR3
11q13.3	1.0692e-08	1.735e-06	chr11:69455851-69488049	CCND1	ORAOV1
19q13.42	4.2296e-09	3.1361e-06	chr19:55297601-55367099	KIR2DL4	KIR2DS4	KIR3DL1	KIR3DL2
6p24.3	4.5617e-06	5.8259e-06	chr6:7845201-8041599	BMP6	MUTED	TXNDC5	PIP5K1P1	MUTED-TXNDC5	EEF1E1-MUTED
1q21.1	3.9833e-09	3.6914e-05	chr1:145769351-145816699	GPR89A
19p13.3	1.6429e-05	4.6984e-05	chr19:571801-2915949	hsa-mir-4321	hsa-mir-1909	hsa-mir-3187	AMH	ATP5D	AZU1	HCN2	BSG	CIRBP	CNN2	CSNK1G2	CFD	ARID3A	EFNA2	ELANE	GAMT	GNG7	MKNK2	GPX4	GADD45B	OAZ1	PALM	POLR2E	POLRMT	PRTN3	PTBP1	RPS15	SGTA	STK11	TCF3	THOP1	SF3A2	AP3D1	MED16	FSTL3	APC2	ABCA7	UQCR11	SBNO2	HMHA1	TIMM13	DAZAP1	FGF22	SLC39A3	LSM7	MBD3
9p11.2	6.0989e-05	6.0989e-05	chr9:42368401-65602549	FAM75A7	LOC286297	FOXD4L4	KGFLP1	FAM75A6	FAM74A4	ANKRD20A3	ANKRD20A2	AQP7P3	FAM27A	LOC642929	LOC643648	FAM74A2	FAM75A5	CNTNAP3B	FOXD4L2	FAM27C	FAM95B1
11p15.4	4.5617e-06	6.4922e-05	chr11:5787901-5841999	OR52N1	OR52N5	OR52N2
8p23.1	0.00011565	0.00011565	chr8:11189651-11295799	FAM167A	SLC35G5	C8orf12	TDH
11q11	0.00016979	0.00021921	chr11:55370751-55433399	OR4P4	OR4C11	OR4S2	OR4C6
19q13.42	5.862e-05	0.00025246	chr19:54799901-54822699	LILRA3	LILRA5
19q13.42	2.9512e-07	0.00027641	chr19:55253451-55286999	KIR2DL1	KIR2DL3
1q23.3	4.0678e-06	0.00057409	chr1:161576751-161596149	FCGR3B	HSPA7
1q22	4.2592e-07	0.0012173	chr1:154922001-156751799	hsa-mir-9-1	hsa-mir-555	hsa-mir-92b	hsa-mir-4258	BGLAP	CKS1B	CLK2	CRABP2	EFNA1	EFNA3	EFNA4	FDPS	GBA	GBAP1	HDGF	LMNA	MEF2D	MTX1	MUC1	PKLR	PRCC	RIT1	SHC1	SSR2	THBS3	CCT3	DAP3	ADAM15	ARHGEF2	SLC25A44	SCAMP3	C1orf61	FAM189B	NES	PMF1	KIAA0907	SYT11	SMG5	RUSC1	LAMTOR2	ZBTB7B	RRNAD1	DPM3	GON4L	GPATCH4	MSTO1
1q21.3	4.4349e-08	0.0015873	chr1:152572951-152637149	LCE2D	LCE3A	LCE3B	LCE3C
11p15.4	8.4553e-05	0.0027852	chr11:3431501-3655799	TRPC2
1q21.1	5.8259e-06	0.0029233	chr1:144892651-144915399	PDE4DIP
1q21.3	5.5059e-09	0.0029233	chr1:152184701-152191849	HRNR
16p13.11	0.0020884	0.0035839	chr16:14863751-14959649	NOMO1	ABCC6P2
9q34.3	0.0044406	0.0044406	chr9:133327701-141213431	hsa-mir-602	hsa-mir-4292	hsa-mir-126	ABCA2	ABL1	ABO	ASS1	C8G	CACNA1B	ENTPD2	CEL	CELP	COL5A1	DBH	SARDH	FCN1	FCN2	FUT7	RAPGEF1	GRIN1	LCN1	NOTCH1	PAEP	PTGDS	RALGDS	RPL7A	RXRA	SNAPC4	SURF1	SURF2	SURF4	MED22	SURF6	TRAF2	TSC1	TTF1	VAV2	BRD3	NUP214	LHX3	GFI1B	SSNA1	EDF1	FUBP3	CLIC3	GTF3C5
17q23.1	0.0010006	0.0057071	chr17:58092751-58123199	HEATR6	TBC1D3P1-DHX40P1	MIR4737
7q34	0.00038788	0.0067594	chr7:141765101-141786299	MGAM
1q21.2	9.9453e-08	0.011993	chr1:148942451-149783399	FCGR1A	FAM91A2	PPIAL4A	LOC388692	HIST2H2BF	LOC645166	PPIAL4B	PPIAL4C	LOC728855	FCGR1C
4p16.1	0.0086082	0.012746	chr4:9495401-9741199	hsa-mir-548i-2	MIR548I2
15q13.3	0.002177	0.01421	chr15:32739451-32888499	LOC100288615
11q13.4	0.00010113	0.015257	chr11:71293801-71506599	FAM86C1	KRTAP5-11
11q14.1	0.0054851	0.019671	chr11:77652201-77691299	INTS4
5p15.33	0.021	0.021	chr5:1-5146549	hsa-mir-4277	NDUFS6	SDHA	SLC6A3	SLC9A3	TERT	TRIP13	PDCD6	SLC12A7	TPPP	EXOC3	PP7080	IRX4	CEP72	AHRR	MRPL36	BRD9	IRX1	ZDHHC11	LPCAT1	CLPTM1L	NKD2	C5orf55	CCDC127	PLEKHG4B	C5orf38	IRX2	ADAMTS16	LOC285577	SLC6A19	LOC340094	SLC6A18	LRRC14B	SDHAP3	LOC728613	MIR4277	LOC100506688	MIR4457	MIR4456	MIR4635
5q31.3	0.021813	0.022455	chr5:140222101-140249099	PCDHA9	PCDHA11	PCDHA10	PCDHA8	PCDHA7	PCDHA6	PCDHA5	PCDHA4	PCDHA3	PCDHA2	PCDHA1
15q11.2	0.0089713	0.022871	chr15:20643951-20867199	HERC2P3	GOLGA6L6	GOLGA8C
19p13.11	0.028364	0.028364	chr19:16229101-16552699	RAB8A	AP1M1	KLF2	FAM32A	EPS15L1	HSH2D	CIB3
1q21.3	2.4489e-09	0.034064	chr1:150482301-150634099	hsa-mir-4257	ECM1	ENSA	MCL1	ADAMTSL4	GOLPH3L	MIR4257
16p11.2	0.016859	0.034064	chr16:29375851-29647299	SULT1A3	SLX1B	SLC7A5P1	LOC388242	SNX29P2	LOC440354	SULT1A4	SLX1A	BOLA2	LOC606724	LOC613038	BOLA2B	SLX1A-SULT1A3	SLX1B-SULT1A4
19p13.2	0.011437	0.040601	chr19:7030551-7081549	ZNF557	MBD3L2	MBD3L5	MBD3L4	MBD3L3
11q25	0.010578	0.044906	chr11:113679551-135006516	hsa-mir-3167	hsa-mir-100	ACRV1	APLP2	APOA1	APOA4	APOC3	ARCN1	FXYD2	CXCR5	CBL	CD3D	CD3E	CD3G	CHEK1	DDX6	DPAGT1	ETS1	FLI1	SLC37A4	GRIK4	H2AFX	HMBS	HSPA8	HTR3A	IL10RA	STT3A	KCNJ1	KCNJ5	VWA5A	MCAM	MLL	NFRKB	NNMT	NRGN	OPCML	PAFAH1B2	PVRL1	RPS25	SC5DL	SCN2B	SCN4B	ST3GAL4	SORL1	SRPR	ST14
4p16.3	0.028364	0.048634	chr4:1-86699	ZNF595	ZNF718
8q24.3	2.4934e-05	0.058377	chr8:141889501-146364022	hsa-mir-1234	hsa-mir-939	hsa-mir-661	hsa-mir-937	hsa-mir-1302-7	BAI1	CYC1	CYP11B1	CYP11B2	EEF1D	GLI4	GML	GPR20	GPT	GRINA	HSF1	LY6E	LY6H	TONSL	PLEC	PTK2	RPL8	TSTA3	ZNF7	ZNF16	PSCA	LY6D	JRK	DGAT1	GPAA1	FOXH1	RECQL4	LRRC14	ZNF623	PTP4A3	PUF60	DENND3	ZC3H3	ARC	BOP1	SCRIB	FBXL6	OPLAH	COMMD5	CPSF1	CYHR1
7p22.1	0.066861	0.066861	chr7:6797051-6863699	CCZ1B	RSPH10B	RSPH10B2
17p11.2	0.079417	0.079417	chr17:16692251-17064549	MPRIP	TNFRSF13B	USP32P1	KRT16P2	FAM106CP
17q21.32	0.015189	0.079417	chr17:45095451-45198199	CDC27
19q13.2	0.079417	0.079417	chr19:40368101-40412149	FCGBP
6q21	0.082286	0.082286	chr6:108985201-109179499	FOXO3	ARMC2	LINC00222
7q22.1	0.087917	0.087917	chr7:99869451-99933449	PMS2P1	GATS	SPDYE3
15q24.1	0.0089713	0.088613	chr15:74356101-74425699	ISLR2	LOC283731	GOLGA6A
22q11.23	0.098858	0.098858	chr22:23656201-23733699	BCR	ZDHHC8P1	CES5AP1
20q13.33	0.10195	0.10195	chr20:58560001-63025520	hsa-mir-647	hsa-mir-4326	hsa-mir-124-3	hsa-mir-133a-2	hsa-mir-3195	hsa-mir-1257	hsa-mir-646	CDH4	CHRNA4	COL9A3	EEF1A2	NPBWR2	KCNQ2	LAMA5	MYT1	NTSR1	OPRL1	PSMA7	PTK6	RPS21	SRMS	TAF4	TCEA2	TPD52L2	TNFRSF6B	OSBPL2	ARFRP1	RGS19	TCFL5	ADRM1	OGFR	DIDO1	HRH3	PRPF6	SS18L1	GTPBP5	GMEB2	SLCO4A1	STMN3	RTEL1	SOX18	YTHDF1	LIME1	UCKL1	C20orf11	PCMTD2
15q24.2	0.011009	0.10718	chr15:75541701-75630199	COMMD4	GOLGA6C	GOLGA6D
11q23.1	0.019431	0.11135	chr11:108126951-124874949	hsa-mir-100	hsa-mir-4301	hsa-mir-34c	APOA1	APOA4	APOC3	ARCN1	ATM	FXYD2	CXCR5	CBL	CD3D	CD3E	CD3G	CRYAB	DDX6	DDX10	DLAT	DPAGT1	DRD2	FDX1	SLC37A4	GRIK4	H2AFX	HMBS	HSPA8	HSPB2	HTR3A	IL10RA	IL18	VWA5A	MCAM	MLL	NCAM1	NNMT	NRGN	PAFAH1B2	POU2AF1	PPP2R1B	PTS	PVRL1	RDX	RPS25	SC5DL	SCN2B	SCN4B
1q32.1	0.0035839	0.1238	chr1:197581001-248402999	hsa-mir-3123	hsa-mir-1537	hsa-mir-1182	hsa-mir-320b-2	hsa-mir-664	hsa-mir-194-1	hsa-mir-3122	hsa-mir-4260	hsa-mir-205	hsa-mir-29b-2	hsa-mir-135b	hsa-mir-1231	hsa-mir-181a-1	ACTA1	ACTN2	ADORA1	PARP1	ADSS	AGT	ARF1	ATF3	ATP2B4	AVPR1B	C4BPA	C4BPB	CACNA1S	CAPN2	CD34	CENPF	CHI3L1	CHIT1	CHML	LYST	CHRM3	CR1	CR1L	CR2	CSRP1	CTSE	CD55	EIF2D	ELF3	ELK4	EPHX1	EPRS	ESRRG
2p13.3	0.13808	0.13808	chr2:70314751-70392649	PCBP1	C2orf42	LOC100133985
2q21.1	0.14851	0.14851	chr2:131388901-131486549	CYP4F30P
15q13.1	0.074043	0.15269	chr15:28882101-28990599	HERC2P9	WHAMMP2
15q14	0.039171	0.16138	chr15:34679901-35045499	hsa-mir-1233-2	GOLGA8A	GJD2	GOLGA8B	MIR1233-1	MIR1233-2
6p21.33	0.11265	0.16841	chr6:29855901-32713099	hsa-mir-1236	hsa-mir-877	ABCF1	AGER	AIF1	ATP6V1G2	CFB	C2	C4A	C4B	DDR1	CDSN	CLIC1	ATF6B	CSNK2B	CYP21A2	CYP21A1P	DOM3Z	GNL1	GTF2H4	HLA-A	HLA-B	HLA-C	HLA-DQA1	HLA-DQA2	HLA-DQB1	HLA-DRA	HLA-DRB1	HLA-DRB5	HLA-DRB6	HLA-E	HLA-H	HLA-J	HLA-L	HSPA1A	HSPA1B	HSPA1L	LTA	LTB	MICB	MSH5	NEU1	NFKBIL1	NOTCH4	PBX2	POU5F1
19p13.2	0.11084	0.16961	chr19:8841501-12167099	hsa-mir-199a-1	hsa-mir-638	hsa-mir-1238	hsa-mir-1181	hsa-mir-4322	ACP5	CDKN2D	CNN1	DNM2	DNMT1	ELAVL3	EPOR	ICAM1	ICAM3	ICAM4	ILF3	LDLR	P2RY11	PDE4A	PIN1	PRKCSH	SMARCA4	ICAM5	TYK2	ZNF69	ZNF121	ZNF177	EIF3G	S1PR2	RAB3D	KEAP1	AP1M2	CARM1	ZNF266	TMED1	CDC37	KANK2	TSPAN16	OR7E24	COL5A3	RDH8	MRPL4	ECSIT	S1PR5	ZNF562	FBXL12
22q13.1	0.17319	0.17319	chr22:38453501-39925949	ATF4	CSNK1E	KCNJ4	MGAT3	PDGFB	RPL3	PLA2G6	SYNGR1	PICK1	GTPBP1	APOBEC3B	JOSD1	DNAL4	TAB1	DDX17	KDELR3	DMC1	CBX6	NPTXR	CBX7	SLC16A8	MAFF	CBY1	SUN2	TMEM184B	SNORD43	APOBEC3C	SMCR7L	TOMM22	APOBEC3G	BAIAP2L2	RPS19BP1	RNU86	SNORD83A	SNORD83B	APOBEC3D	APOBEC3H	APOBEC3A	APOBEC3F	LOC400927	LOC646851	LOC100506472
16p12.3	0.062187	0.177	chr16:17564401-18794099	hsa-mir-3179-3	XYLT1	NOMO2	ABCC6P1	MIR3180-3	MIR3180-1	MIR3179-2	MIR3180-2	MIR3179-1	MIR3179-3
11q13.2	0.0097569	0.18207	chr11:60152451-68341449	hsa-mir-3163	hsa-mir-612	hsa-mir-194-2	hsa-mir-1237	hsa-mir-1908	ACTN3	ADRBK1	ALDH3B1	ALDH3B2	ARL2	BAD	BBS1	C11orf2	MRPL49	ZNHIT2	C11orf9	C11orf10	DAGLA	CAPN1	CD5	CD6	MS4A1	CFL1	CHKA	CHRM1	COX8A	CST6	CTSW	DDB1	EEF1G	MARK2	ESRRA	FAU	FEN1	FKBP2	FTH1	GNG3	GSTP1	SLC29A2	DNAJC4	INCENP	FADS1	FADS3	LRP5	LTBP3	MEN1
17p13.2	0.19042	0.19042	chr17:3336101-4391099	ASPA	ATP2A3	CTNS	ITGAE	P2RX1	P2RX5	UBE2G1	TRPV1	OR1E2	ZZEF1	SHPK	TAX1BP3	ANKFY1	C17orf85	TMEM93	GSG2	CAMKK1	SPATA22	CYB5D2	TRPV3	SPNS3	P2RX5-TAX1BP3
4p16.3	0.10451	0.20164	chr4:3949651-4190499	FAM86EP
7p13	0.20709	0.20709	chr7:44047351-44073699	POLR2J4	SPDYE1	RASA4P
15q26.3	0.16421	0.23055	chr15:83826001-102531392	hsa-mir-1302-10	hsa-mir-1469	hsa-mir-3175	hsa-mir-3174	hsa-mir-9-3	hsa-mir-7-2	hsa-mir-1276	ACAN	ALDH1A3	ANPEP	BLM	BNC1	CHD2	FES	IDH2	IGF1R	ISG20	MAN2A2	MEF2A	MFGE8	NMB	NTRK3	FURIN	PCSK6	PDE8A	PLIN1	POLG	RLBP1	SH3GL3	SNRPA1	NR2F2	ST8SIA2	PEX11A	IQGAP1	PRC1	SLC28A1	ZNF592	SV2B	AP3S2	SEMA4B	CIB1	ABHD2	AKAP13	CHSY1	SYNM	SEC11A
CAUCASIAN (LOSS)
cytoband	q value	residual q value	wide peak boundaries	genes in wide peak
22q11.22	7.3327e-274	8.2395e-271	chr22:22990301-23437699	hsa-mir-650	MIR650	IGLL5
2p11.2	2.4022e-57	2.4022e-57	chr2:89050301-91824799	ANKRD36BP2	MIR4436A
8p23.1	3.6129e-43	5.3955e-34	chr8:7005601-8176599	hsa-mir-548i-3	DEFB4A	SPAG11B	DEFB103B	DEFB104A	DEFB105A	DEFB106A	DEFB107A	FLJ10661	LOC349196	DEFB103A	FAM90A13	FAM90A5	FAM90A7	FAM90A8	FAM90A18	FAM90A9	FAM90A10	DEFB107B	DEFB104B	DEFB106B	DEFB105B	DEFB109P1B	FAM90A14	SPAG11A	FAM90A20	FAM90A19	FAM66B	ZNF705G	FAM66E	LOC100132396	DEFB4B	MIR548I3
14q32.32	2.2036e-40	3.3353e-33	chr14:103188701-103388999	TRAF3
16q22.1	2.7962e-34	2.6726e-32	chr16:70099801-70286849	PDPR	EXOSC6	CLEC18C	LOC729513
4p16.3	5.3592e-27	5.3592e-27	chr4:1-264349	ZNF595	ZNF718	ZNF876P
13q14.2	2.1177e-38	1.4887e-22	chr13:48832651-49063099	RB1	LPAR6
13q13.3	3.3353e-33	3.021e-21	chr13:34540201-36296199	MAB21L1	NBEA
2p24.1	1.1221e-22	1.4016e-20	chr2:21365501-23785399	LOC645949
13q31.1	2.2419e-27	2.3061e-19	chr13:79233301-80055399	RBM26	RBM26-AS1
10p11.21	2.0051e-19	1.4978e-18	chr10:35930351-38238799	ZNF248	ANKRD30A	MTRNR2L7
6p12.3	3.5165e-18	3.6233e-17	chr6:49754951-49989699	CRISP1	DEFB110	DEFB113	DEFB114	DEFB133
8p23.1	1.2845e-23	5.1337e-17	chr8:11189551-11252049	TDH
1p32.3	4.5105e-27	8.7091e-17	chr1:50887301-51701999	CDKN2C	FAF1	C1orf185
22q11.23	1.2239e-22	8.9026e-16	chr22:24323101-24396099	GSTT1	GSTTP1	LOC391322
16q12.1	9.1803e-28	5.9204e-15	chr16:50709801-51170749	hsa-mir-3181	CYLD	NOD2
1p21.3	2.0248e-67	9.4224e-14	chr1:97280401-99127249	hsa-mir-137	DPYD	MIR137HG	MIR137	LOC729987	MIR2682
14q32.12	5.2704e-27	5.7835e-13	chr14:92185701-92347299	TC2N
13q13.3	1.938e-22	1.1344e-12	chr13:38357601-39540099	UFM1	FREM2
16q21	4.9139e-16	3.2835e-12	chr16:59785801-64981249	CDH8	LOC644649
12p13.2	2.3363e-19	7.7577e-12	chr12:11214851-11338299	TAS2R43	TAS2R30	LOC100129361
4q34.2	6.7233e-13	9.4025e-12	chr4:176923601-177105749	WDR17
12q23.2	1.3446e-16	1.4255e-11	chr12:102506101-102789799	PMCH	PARPBP
1p22.1	4.8072e-74	5.6073e-11	chr1:92846301-93297699	GFI1	EVI5
14q22.3	8.1394e-25	6.3092e-11	chr14:56046751-56232999	KTN1
8p22	1.018e-15	1.3372e-10	chr8:14710851-15967299	hsa-mir-383	TUSC3	MIR383
8q21.3	8.1852e-14	1.4613e-10	chr8:87573701-87878699	CNGB3
8p11.22	1.3194e-11	1.5647e-10	chr8:38962401-39463949	ADAM3A	ADAM32	ADAM5P	LOC100130964
1p13.3	5.3494e-51	1.7394e-10	chr1:110224601-110276599	GSTM1	GSTM5
6q25.3	5.1869e-24	3.4358e-10	chr6:155575751-155717599	CLDN20	TFB1M
4q13.1	5.9204e-15	5.0476e-10	chr4:65240801-67142449	EPHA5	LOC401134	LOC100144602
12p13.2	1.0628e-16	5.0476e-10	chr12:10573101-10598899	KLRC2
4q31.1	1.5605e-10	1.196e-09	chr4:141214601-141446299	CLGN	SCOC
1p13.2	6.7346e-51	1.2722e-09	chr1:115323301-115576599	SYCP1
20q13.33	2.3913e-09	2.2685e-09	chr20:58422051-58511749	SYCP2
16q12.2	5.7999e-17	3.4572e-09	chr16:55739101-55895149	CES1	CES1P1	CES1P2
6q27	1.3388e-18	6.2167e-09	chr6:167571301-167704849	TCP10L2
2p14	6.0782e-09	1.0675e-08	chr2:67211951-68316349	C1D	ETAA1	LOC644838
16q11.2	2.7206e-18	2.8035e-08	chr16:34292401-46614499	ANKRD26P1	LOC146481	LOC283914	FLJ26245	UBE2MP1	LOC100130700
1p31.1	7.9643e-43	3.3023e-08	chr1:72241551-74701199	FPGT	LRRIQ3	NEGR1-IT1
6q16.3	3.6372e-11	4.5425e-08	chr6:100911501-101338399	ASCC3
1p22.3	7.4649e-53	4.7603e-08	chr1:86174101-86897899	ODF2L	COL24A1
8q21.13	3.671e-10	5.5088e-08	chr8:82667701-85441299	SNX16
8q23.3	7.9574e-11	1.0672e-07	chr8:113585801-116426699	hsa-mir-2053	MIR2053
12q14.1	2.2124e-08	1.6229e-07	chr12:62260801-62877849	USP15
2q33.1	3.6335e-09	1.6713e-07	chr2:201371451-201467699	SGOL2
11q22.3	1.6713e-07	1.6713e-07	chr11:102954101-103780199	DYNC2H1	MIR4693
1p12	1.9387e-42	1.9675e-07	chr1:118495451-119427799	SPAG17
14q24.3	2.5479e-30	3.0028e-07	chr14:75078601-75179999	KIAA0317
14q11.2	1.6229e-07	4.1654e-07	chr14:1-20482899	OR4K5	OR11H2	OR4K1	OR4K15	OR4N2	OR4K2	POTEG	OR11H12	OR4Q3	OR4M1	POTEM	LOC642426
12p11.22	2.7154e-09	4.6648e-07	chr12:28123201-29423149	CCDC91
1p31.1	5.3707e-56	5.1502e-07	chr1:84417801-84764399	PRKACB
8q22.3	1.7873e-09	6.0248e-07	chr8:104455651-105360499	RIMS2
12q21.2	1.8598e-12	1.1209e-06	chr12:75601351-75728499	CAPS2
13q31.1	1.0209e-14	1.1209e-06	chr13:80113651-84453399	SPRY2
4q13.1	2.8265e-10	1.1363e-06	chr4:57976201-65145549	LPHN3
10p12.2	3.4297e-07	1.2278e-06	chr10:22209551-22634199	BMI1	COMMD3	EBLN1	LOC100130992	COMMD3-BMI1
14q31.1	1.0078e-27	1.3034e-06	chr14:80820801-81528399	CEP128
7p21.1	9.2624e-08	1.4043e-06	chr7:17382401-18066799	SNX13
8p12	1.5243e-09	1.4043e-06	chr8:30670251-30853999	TEX15
13q12.11	7.8113e-10	1.4603e-06	chr13:20247401-20398099	PSPC1
1p36.13	5.8021e-07	1.6721e-06	chr1:17046651-17194599	MST1P9	MIR3675
4q21.21	8.1505e-09	1.6852e-06	chr4:81211251-82009849	BMP3	C4orf22
12q23.3	1.2246e-09	2.2508e-06	chr12:105467701-105570449	KIAA1033
1p21.1	1.3476e-47	2.9167e-06	chr1:101096401-107691099	AMY1A	AMY1B	AMY1C	AMY2A	AMY2B	COL11A1	S1PR1	EXTL2	VCAM1	DPH5	PRMT6	RNPC3	DNAJA1P5	OLFM3	SLC30A7	LOC648740	LOC100129138
2q31.1	8.9439e-11	3.3828e-06	chr2:175816951-176790449	hsa-mir-933	ATP5G3	ATF2	MIR933
1p31.3	6.8947e-22	4.4724e-06	chr1:62917351-63269199	ANGPTL3	DOCK7
10q25.3	1.6721e-06	5.0489e-06	chr10:116737401-117823699	ATRNL1
2q22.1	8.1109e-07	5.4788e-06	chr2:139537901-143642899	LRP1B	LOC647012
13q32.1	8.7215e-10	5.6793e-06	chr13:96443501-96743599	UGGT2
6q23.3	4.2034e-12	7.7235e-06	chr6:135560351-136006299	AHI1
6q24.1	1.7373e-13	8.4935e-06	chr6:139114351-139225649	ECT2L
13q22.3	5.6043e-11	9.4936e-06	chr13:77592951-78129699	MYCBP2
3p24.1	9.8945e-06	9.8945e-06	chr3:28294901-29224549	AZI2	ZCWPW2	LOC645206
7p22.1	4.7234e-07	9.8945e-06	chr7:6791001-7278449	CCZ1B	RSPH10B	RSPH10B2	LOC100131257
12q21.31	1.2134e-13	1.1278e-05	chr12:85423251-85677599	LRRIQ1
16q12.2	9.0341e-16	1.1972e-05	chr16:52553301-53469399	CHD9	LOC643714	LOC643802
18p11.21	1.1352e-05	1.1972e-05	chr18:14542551-15319399	hsa-mir-3156-2	ANKRD30B	MIR3156-2
1p36.11	3.7964e-06	1.9792e-05	chr1:25573601-25688749	RHD
6q14.1	2.9404e-07	2.0814e-05	chr6:80657301-80816349	TTK
6q22.31	2.5484e-09	3.5194e-05	chr6:120336201-121767699	hsa-mir-3144	C6orf170
20q12	3.6338e-05	3.5194e-05	chr20:37668301-39766199	TOP1	MAFB	LOC339568
16p13.3	5.042e-10	4.132e-05	chr16:2580951-2688399	hsa-mir-3178	PDPK1	LOC652276	MIR3178
14q23.1	1.3672e-24	4.6779e-05	chr14:60765701-61111699	SIX6	C14orf39
5q15	3.1437e-06	4.7893e-05	chr5:93410601-94043199	ANKRD32	KIAA0825
10q24.32	1.6221e-05	5.1816e-05	chr10:104142601-104162399	NFKB2
12q23.1	5.1293e-10	5.1816e-05	chr12:96729101-97957599	hsa-mir-1251	NEDD1	RMST	MIR1251
16q24.3	2.724e-09	5.4713e-05	chr16:90034451-90354753	AFG3L1P	C16orf3	GAS8	PRDM7	DBNDD1	CENPBD1	LOC100130015
4p12	4.4609e-06	6.7147e-05	chr4:44724051-46263799	GABRG1
12q22	3.5942e-11	6.81e-05	chr12:93158051-93569699	EEA1
8q24.21	1.9856e-05	7.9585e-05	chr8:126096101-128098599	TRIB1	FAM84B	NSMCE2	LOC100130231	PCAT1
6q13	1.6852e-06	8.102e-05	chr6:71012701-71289099	FAM135A
8q21.3	1.0385e-08	8.8688e-05	chr8:91064101-91634249	CALB1
4p15.31	2.6037e-10	0.00011322	chr4:17842151-20255399	LCORL
1p32.1	1.0586e-16	0.00011592	chr1:60228401-60359549	HOOK1
16p13.3	3.6849e-09	0.00013351	chr16:3767401-4241949	ADCY9	CREBBP
13q12.11	1.0675e-08	0.00014805	chr13:21999901-22246349	EFHA1
1p31.1	4.9935e-27	0.00018938	chr1:68962751-70610899	PIN1P1	LRRC7
2q32.1	9.6361e-09	0.00018938	chr2:188295701-189598749	hsa-mir-561	TFPI	GULP1	MIR561
7q21.11	1.4249e-06	0.0002081	chr7:81399151-82387799	CACNA2D1
16q23.3	4.6989e-09	0.0002081	chr16:82203551-83841849	hsa-mir-3182	CDH13	MIR3182
1p22.2	4.3803e-59	0.00024441	chr1:89454001-89517999	GBP3
4q13.2	1.3374e-08	0.00024441	chr4:69362351-69681899	UGT2B15	UGT2B17
5q21.3	2.0814e-05	0.00024441	chr5:107703801-108670899	FER
10q21.1	2.6417e-05	0.00024441	chr10:54531351-58117149	hsa-mir-548f-1	PCDH15	MTRNR2L5
4q21.1	1.5245e-06	0.00025678	chr4:75971301-76481299	RCHY1	THAP6	LOC441025
10p13	5.6735e-05	0.00025678	chr10:15761401-16526499	FAM188A
13q13.3	6.9591e-14	0.00028485	chr13:36521601-36878699	SOHLH2	CCDC169	CCDC169-SOHLH2
1p36.33	0.00014805	0.00029646	chr1:1570001-1656299	CDK11B	MMP23A	CDK11A	SLC35E2B
18q21.2	0.00031174	0.00030653	chr18:51880701-52544499	C18orf54	C18orf26
4q24	5.6174e-05	0.00031551	chr4:104017601-104510799	CENPE
6q24.2	4.9147e-15	0.00031551	chr6:144509501-145946499	UTRN
12p12.1	6.3829e-11	0.00033557	chr12:21069601-21422799	SLCO1B1	SLCO1B7
13q12.12	5.4164e-09	0.00033557	chr13:25285251-25456999	RNF17
2q24.3	2.39e-07	0.00040951	chr2:166810051-167055199	SCN1A
13q12.13	3.0412e-09	0.00051179	chr13:25916551-26618749	ATP8A2
14q23.1	4.129e-22	0.00058984	chr14:61190851-61447899	MNAT1	TRMT5
10q23.31	0.00028485	0.00065802	chr10:91434951-92017999	KIF20B	FLJ37201	LOC643529
13q33.1	1.5535e-07	0.0007034	chr13:103054101-103338099	TPP2
8p12	4.4086e-07	0.00073676	chr8:30890651-31497299	WRN
1p31.1	3.9872e-43	0.00078498	chr1:78340451-78470949	FUBP1	NEXN
2q21.2	0.0002081	0.00078498	chr2:132558701-133066799	hsa-mir-663b	ANKRD30BL	MIR663B
2q33.1	2.8284e-05	0.00088276	chr2:202345501-202485599	ALS2CR11
2q37.1	0.00023232	0.0010068	chr2:231090301-231589499	SP100	SP140	SP140L	LOC151475
1q31.2	1.3418e-05	0.0010233	chr1:192627451-193028899	RGS2	UCHL5
2q34	5.4713e-05	0.0010233	chr2:211543801-213347099	hsa-mir-548f-2	MIR548F2
4p15.2	5.4788e-06	0.0010233	chr4:26492001-26862599	TBC1D19
8p23.2	1.1874e-12	0.0010233	chr8:2093301-6266749	CSMD1	LOC100287015
1p34.3	5.5763e-05	0.0012338	chr1:35658601-35899299	ZMYM4
13q21.2	4.2839e-16	0.0013339	chr13:58240501-60971349	DIAPH3
12q12	3.269e-05	0.0014417	chr12:40499551-41133299	LRRK2
12q21.31	2.9205e-12	0.0014417	chr12:86230301-88429299	NTS	MGAT4C	C12orf50	MKRN9P	MIR548AL
4q31.3	0.00046853	0.0018383	chr4:151178601-152020999	LRBA	MAB21L2
2q31.2	6.9596e-08	0.0021602	chr2:179345001-179369849	PLEKHA3
2p22.1	0.0018875	0.0025756	chr2:39196501-39405799	SOS1
13q14.3	3.4782e-17	0.0025756	chr13:53016351-53227199	CKAP2	HNRNPA1L2	TPTE2P3
4p15.31	1.5811e-08	0.0027137	chr4:17964651-20530749	hsa-mir-218-1	MIR218-1	SLIT2-IT1
22q12.2	3.2401e-07	0.0028019	chr22:29661551-29833399	AP1B1	EWSR1	RASL10A	GAS2L1	SNORD125	MIR3653
2p24.2	1.9562e-06	0.0029159	chr2:16769051-17845099	VSNL1	RAD51AP2
4q12	4.3356e-05	0.0031491	chr4:54232201-54326449	FIP1L1
8q24.11	3.7359e-05	0.0031491	chr8:118552101-119209649	EXT1
10q11.22	0.00036837	0.0033199	chr10:49482901-49917499	MAPK8	ARHGAP22
4q27	0.00033787	0.0035357	chr4:122872901-123301999	KIAA1109
8q24.22	0.0022132	0.0035357	chr8:132052801-133041299	EFR3A
12q21.31	4.9569e-11	0.0041651	chr12:81649551-82747999	PPFIA2
14q23.3	4.8128e-24	0.0041651	chr14:65470801-66954649	hsa-mir-625	FUT8	MAX	LOC645431	LOC100506321	MIR4708	MIR4706
20p12.1	0.00011415	0.0041651	chr20:13610901-13765799	ESF1
1q31.3	0.00012902	0.0044819	chr1:196716601-196912949	CFHR1	CFHR4	CFHR3
4q22.1	0.00011322	0.0044819	chr4:90872551-93225899	FAM190A
1q21.1	7.3503e-23	0.0048556	chr1:121309751-143465299	hsa-mir-3118-3	hsa-mir-3118-2	hsa-mir-3118-1	LOC375010
14q32.13	5.0651e-14	0.0051647	chr14:94595951-94750399	PPP4R4
6q13	4.132e-05	0.0054643	chr6:70099401-70589299	LMBRD1
8q11.23	0.005031	0.0057806	chr8:53477801-53852499	RB1CC1
4p15.33	0.00023221	0.0067213	chr4:11401601-13546299	NKX3-2	RAB28	LOC285547	HSP90AB2P
16q23.1	2.5438e-06	0.0067213	chr16:74340151-74485749	LOC283922	CLEC18B
12q21.2	2.0454e-09	0.0067429	chr12:77458501-79679549	NAV3
14q23.3	9.3378e-27	0.0077687	chr14:66965201-67656249	GPHN
17q24.3	0.0063402	0.0077687	chr17:67137001-67410999	ABCA10	ABCA5
8q21.3	8.917e-07	0.0082394	chr8:89198901-90914699	RIPK2
12p12.1	1.1209e-06	0.0086024	chr12:25398401-26207999	hsa-mir-4302	IFLTD1	MIR4302	LOC100506451
17p13.1	0.0071017	0.0088209	chr17:7509501-7589399	ATP1B2	SHBG	TP53	SAT2
17q23.1	0.0065871	0.0088209	chr17:58156251-58179299	LOC645638
14q13.2	0.00020867	0.00915	chr14:36005001-36295899	RALGAPA1
4q13.3	5.9818e-06	0.01006	chr4:70621101-70798099	SULT1E1
8p21.2	2.6785e-05	0.01006	chr8:25301701-25699299	CDCA2
22q11.1	9.4936e-06	0.010322	chr22:17128701-17378299	ANKRD62P1-PARP4P3	HSFY1P1	XKR3
8p23.3	2.4007e-13	0.010623	chr8:1-439799	FBXO25	ZNF596	OR4F21	RPL23AP53
12p12.3	2.9696e-07	0.010623	chr12:18892101-19593649	PLEKHA5
13q14.11	2.3105e-13	0.010623	chr13:42534901-42866599	DGKH	LOC100507240
2q37.1	0.0022282	0.011055	chr2:234380701-234526299	USP40
8q22.2	0.00031119	0.011055	chr8:99964301-100548899	VPS13B
13q14.11	4.2495e-12	0.011055	chr13:42045001-42701399	KIAA0564	LOC100507240
4q13.2	1.4235e-06	0.011974	chr4:69536301-69794199	UGT2B10
13q33.1	2.8194e-06	0.011974	chr13:103451001-103698299	ERCC5	BIVM	METTL21CP1	BIVM-ERCC5
14q22.1	2.1832e-08	0.012243	chr14:50862501-51026799	MAP4K5
21q11.2	0.012198	0.012243	chr21:11097701-15288999	hsa-mir-3118-5	hsa-mir-3156-3	C21orf15	ANKRD30BP2	POTED	MIR3156-3
8q24.12	0.00045929	0.013117	chr8:120651101-120846199	TAF2
14q32.2	2.09e-09	0.015139	chr14:96955101-97299649	PAPOLA
18p11.32	0.014929	0.015139	chr18:2636351-2847549	SMCHD1	CBX3P2
1q24.3	0.0021737	0.015897	chr1:172437951-172629349	C1orf9
9p22.2	0.0085375	0.016653	chr9:16870651-17761499	CNTLN
4q33	0.0013339	0.017773	chr4:170190001-170556799	NEK1
12q24.33	0.004794	0.017773	chr12:133257801-133417899	GOLGA3	PXMP2	ANKLE2	PGAM5
8q23.1	6.7147e-05	0.018328	chr8:110355901-110562349	PKHD1L1
17p12	0.0021432	0.018328	chr17:15586151-15638999	ZNF286A
10q21.2	0.0055264	0.019059	chr10:62445151-62631199	CDK1
2p16.1	0.01029	0.020069	chr2:55511601-55746749	CCDC88A
12q21.32	7.2329e-09	0.020728	chr12:88436651-88541849	CEP290
13q14.2	4.3748e-17	0.020728	chr13:47324801-47409649	ESD
13q13.1	3.5675e-12	0.021041	chr13:32886001-32975599	BRCA2
20p11.23	0.0027	0.023314	chr20:18810601-19867199	SLC24A3	LOC100130264
4q23	0.0029838	0.023668	chr4:100463451-100737999	MTTP	RG9MTD2
1q42.13	0.022298	0.024799	chr1:227505801-227922999	ZNF678	ZNF847P	LOC100130093
2q31.1	2.3382e-05	0.024799	chr2:171823601-172180099	TLK1
17p11.2	0.0064909	0.024799	chr17:18639401-18768949	FBXW10	FAM18B1
10p11.22	0.0065049	0.026103	chr10:32832301-33190349	C10orf68
8q13.1	0.010038	0.028827	chr8:67430701-67547299	MYBL1
2p16.1	0.012665	0.03017	chr2:58373351-60614399	FANCL	FLJ30838
4q31.3	0.0070017	0.031708	chr4:152584701-153457449	hsa-mir-3140	PET112	FBXW7	MIR3140
12p13.32	0.030423	0.031708	chr12:319301-4918899	CACNA1C	CCND2	FGF6	FKBP4	FOXM1	NDUFA9	NINJ2	RAD52	KDM5A	SLC6A13	TEAD4	TULP3	FGF23	DYRK4	AKAP3	RAD51AP1	TSPAN9	ERC1	GALNT8	ITFG2	PRMT8	PARP11	C12orf4	C12orf5	WNK1	ADIPOR2	WNT5B	C12orf32	NRIP2	CCDC77	EFCAB4B	CACNA2D4	FBXL14	DCP1B	B4GALNT3	LOC283440	LRTM2	LOC100271702	LOC100292680	MIR3649	LOC100507424	LOC100652846
6q16.1	5.8186e-05	0.03355	chr6:97532851-99282549	hsa-mir-2113	MMS22L	MIR2113	MIR548H3
13q33.3	4.165e-05	0.03355	chr13:108863501-109282099	TNFSF13B	ABHD13
18p11.22	0.033816	0.03355	chr18:9134301-9336899	ANKRD12
13q12.3	7.7577e-12	0.034569	chr13:31548801-31774199	HSPH1
1q31.1	0.003822	0.03586	chr1:186280651-186344899	TPR
7q11.21	0.0080145	0.03586	chr7:63727201-64152199	ZNF680	LOC641746	LOC649395	ZNF736
2q34	0.001777	0.037434	chr2:210885201-211052749	C2orf67
11p14.3	0.032655	0.038724	chr11:21594551-22644099	SLC17A6	ANO5
6q22.33	5.5945e-07	0.039579	chr6:128176201-129204499	PTPRK
13q14.11	5.3644e-13	0.039579	chr13:44199201-44734399	LINC00284	LACC1	CCDC122
13q13.1	1.0595e-09	0.039579	chr13:32376251-32877999	FRY	EEF1DP3
11p13	0.034569	0.041575	chr11:32616401-32851799	CCDC73
12q13.11	0.0048509	0.041575	chr12:46633601-47158549	SLC38A2
4q32.3	0.0056043	0.044622	chr4:166419451-167663049	TLL1
14q12	0.00075646	0.044622	chr14:32438551-32902449	ARHGAP5	ARHGAP5-AS1
6q11.1	0.0001486	0.046867	chr6:58264601-63989649	KHDRBS2
14q21.3	1.1289e-06	0.046867	chr14:47121001-50050299	MDGA2	MIR548Y	LOC100506433
5q12.3	0.022572	0.050312	chr5:64857501-64920599	TRIM23	PPWD1
7q21.11	0.00023992	0.050312	chr7:80546101-81588449	HGF
1p12	3.8786e-48	0.051024	chr1:117753551-118413299	MAN1A2	FAM46C
13q34	5.8207e-05	0.051024	chr13:110959201-111175449	COL4A2
13q21.32	2.4581e-11	0.053384	chr13:63745701-70371199	PCDH9	OR7E156P	LINC00550
6q21	0.00025678	0.054983	chr6:114178901-114378499	HDAC2	LOC285758	FLJ34503
2q33.1	0.0027396	0.05697	chr2:198572951-200137099	PLCL1	BOLL
3q27.2	0.054576	0.05697	chr3:185655901-185864999	ETV5	LOC344887
6q14.1	0.0017749	0.058468	chr6:79608301-79911799	PHIP
11p15.2	0.054462	0.058468	chr11:13515001-14062949	FAR1
13q33.3	0.00010076	0.058468	chr13:108958901-110406649	MYO16
10q23.32	0.026282	0.059844	chr10:93044001-93389449	HECTD2	LOC100188947
2q13	0.065893	0.066834	chr2:111921901-112686899	ANAPC1	LOC541471	MIR4435-2	MIR4435-1
13q34	3.2082e-05	0.066834	chr13:111522001-111973049	ARHGEF7	ANKRD10
16p11.2	0.025928	0.066834	chr16:31716901-32163699	ZNF267	ZNF720
17q12	0.030868	0.066834	chr17:36292701-36453099	TBC1D3F	LOC440434	TBC1D3
14q32.12	7.6986e-11	0.068769	chr14:93799251-94187649	UNC79	COX8C
7q21.12	0.014529	0.072731	chr7:87229501-87507449	SLC25A40	RUNDC3B
1p36.11	0.019388	0.077025	chr1:24201901-24446549	SRSF10	PNRC2	MYOM3	MIR378F
14q22.3	2.0315e-15	0.077025	chr14:57272401-57857499	EXOC5	MUDENG	OTX2OS1
6q21	0.0012338	0.079135	chr6:112420501-112646199	LAMA4
12p12.1	2.9994e-06	0.079135	chr12:22487601-23685249	KIAA0528	ETNK1
6q22.31	2.9868e-07	0.081525	chr6:123384901-123958299	TRDN
18q22.1	0.082699	0.081525	chr18:61765451-64171799	CDH7	LOC284294	LOC400654
6q24.2	3.721e-14	0.086962	chr6:143766151-143929499	FUCA2	PEX3	LOC285740
10q21.2	0.040776	0.086962	chr10:62671501-63422749	TMEM26
18q12.1	0.082349	0.086962	chr18:30351001-31241599	C18orf34
20p12.3	0.0057813	0.086962	chr20:7999901-9331599	PLCB1
1q25.3	0.013297	0.093433	chr1:185071701-185268049	SWT1	TRMT1L
13q33.3	9.9405e-05	0.095129	chr13:106127201-107822299	EFNB2	ARGLU1	LINC00460
4q26	0.0047415	0.10141	chr4:120383001-120980599	PDE5A
6q22.33	9.1975e-06	0.10141	chr6:128841501-129898399	LAMA2
7q11.21	0.025852	0.1062	chr7:64389601-64498749	ERV3-1	ZNF117
17q11.2	0.070361	0.11238	chr17:29421401-29718699	EVI2A	EVI2B	NF1	OMG
6q22.33	1.1363e-06	0.1221	chr6:126360401-127601399	hsa-mir-588	RSPO3	CENPW
20q11.21	0.035762	0.1221	chr20:26188651-29647049	hsa-mir-663	MLLT10P1	FRG1B	MIR663A
2q24.1	0.0032018	0.12262	chr2:154335001-155555799	GALNT13	LOC100144595
3q26.1	0.12005	0.12262	chr3:163719601-164904549	hsa-mir-720	hsa-mir-1263	SI
12p13.31	0.0002453	0.12262	chr12:8387701-8685899	CLEC6A	CLEC4D	LOC389634
2q21.3	0.043341	0.12878	chr2:136261801-136499199	hsa-mir-128-1	R3HDM1	MIR128-1
14q21.2	9.2789e-06	0.13202	chr14:45543501-47120299	FKBP3	PRPF39	MIS18BP1	FANCM	SNORD127
22q13.33	0.13202	0.13202	chr22:47075651-51304566	hsa-mir-3201	ACR	ARSA	CHKB	CPT1B	TYMP	MAPK11	MAPK12	SBF1	PPP6R2	ZBED4	SCO2	RABL2B	MLC1	MAPK8IP2	PLXNB2	BRD1	TBC1D22A	FAM19A5	NCAPH2	MOV10L1	MIOX	PANX2	CERK	ALG12	CRELD2	ADM2	TRABD	SELO	HDAC10	SHANK3	TUBGCP6	LOC90834	LMF2	KLHDC7B	LOC284933	RPL23AP82	LOC339685	C22orf34	CHKB-CPT1B	FLJ46257	IL17REL	FAM116B	PIM3	ODF3B	SYCE3
4q31.21	0.050441	0.14223	chr4:146017301-146054899	ABCE1
10q11.21	0.014929	0.14223	chr10:42848301-43087999	LOC84856	ZNF37BP
2q32.2	0.00047026	0.14973	chr2:191552101-191833799	GLS
4p12	0.030926	0.15455	chr4:47809201-47938299	NFXL1
5p13.2	0.15109	0.15455	chr5:36067001-36152899	hsa-mir-580	LMBRD2	MIR580
4q13.3	0.0048017	0.15984	chr4:71894351-72607499	SLC4A4
8q13.2	0.076512	0.15984	chr8:68108301-68334699	ARFGEF1
13q22.2	4.3214e-06	0.15984	chr13:76178651-77454349	LMO7
4q32.1	0.087367	0.1683	chr4:158093201-158509249	GRIA2	LOC340017
6q14.1	0.008345	0.1683	chr6:76163901-76631099	MYO6	SENP6
12q12	0.0089655	0.1683	chr12:44181901-44238399	TWF1
16p12.3	0.17041	0.1683	chr16:20791351-20869499	LOC81691	ERI2
4p13	0.02089	0.17505	chr4:41988401-42112899	SLC30A9
7q11.21	0.038016	0.17505	chr7:64023501-64363699	ZNF138	ZNF107	LOC641746
3q13.2	0.17826	0.17826	chr3:112218301-112282049	ATG3
4q28.1	0.033016	0.17826	chr4:128695401-128802199	HSPA4L
17p11.2	0.023611	0.17826	chr17:16553201-16692249	CCDC144A
7q33	0.19577	0.19338	chr7:134943201-135242699	CNOT4
7q21.2	0.12204	0.19338	chr7:91509301-91741499	AKAP9
17p11.2	0.065273	0.19723	chr17:20304301-20404899	LGALS9B
12q12	0.01061	0.20978	chr12:38717901-39945049	KIF21A	CPNE8
12q21.33	1.5408e-06	0.21437	chr12:91348901-91539049	EPYC	LUM	KERA
17p13.3	0.19055	0.22328	chr17:3119801-3194999	OR3A2	OR1D4
1q23.3	0.19056	0.22857	chr1:163187301-164761699	RGS5	NUF2	LOC100505795
2p14	0.14797	0.22857	chr2:64118651-64321799	VPS54
20p13	0.23427	0.23361	chr20:1532151-1875699	SIRPB1	SIRPG	LOC100289473
16q22.1	0.052561	0.24884	chr16:69496501-69743349	hsa-mir-1538	NFAT5	MIR1538
6p11.2	0.022556	0.2535	chr6:56889051-57037199	ZNF451	KIAA1586
9p21.3	0.11637	0.2535	chr9:21865951-22447099	CDKN2A	CDKN2B	C9orf53	CDKN2B-AS1
6q13	4.132e-05	1	chr6:1-171115067	hsa-mir-1913	hsa-mir-1202	hsa-mir-1273c	hsa-mir-3145	hsa-mir-548a-2	hsa-mir-588	hsa-mir-3144	hsa-mir-548b	hsa-mir-587	hsa-mir-2113	hsa-mir-4282	hsa-mir-30a	hsa-mir-30c-2	hsa-mir-548u	hsa-mir-133b	hsa-mir-586	hsa-mir-1275	hsa-mir-219-1	hsa-mir-1236	hsa-mir-877	hsa-mir-3143	hsa-mir-548a-1	ABCF1	ACAT2	CRISP1	AGER	AIF1	AIM1	AMD1	ARG1	ATP6V1G2	BAI3	BAK1	BCKDHB	CFB	PRDM1	BMP5	BMP6	DST	BPHL	BTN1A1	BYSL	C2	C4A	C4B	DDR1
6q24.2	3.721e-14	1	chr6:1-171115067	hsa-mir-1913	hsa-mir-1202	hsa-mir-1273c	hsa-mir-3145	hsa-mir-548a-2	hsa-mir-588	hsa-mir-3144	hsa-mir-548b	hsa-mir-587	hsa-mir-2113	hsa-mir-4282	hsa-mir-30a	hsa-mir-30c-2	hsa-mir-548u	hsa-mir-133b	hsa-mir-586	hsa-mir-1275	hsa-mir-219-1	hsa-mir-1236	hsa-mir-877	hsa-mir-3143	hsa-mir-548a-1	ABCF1	ACAT2	CRISP1	AGER	AIF1	AIM1	AMD1	ARG1	ATP6V1G2	BAI3	BAK1	BCKDHB	CFB	PRDM1	BMP5	BMP6	DST	BPHL	BTN1A1	BYSL	C2	C4A	C4B	DDR1
[truncated: 1,172 more columns]
